# Supplementary material for: TELE-critical Care verSus usual Care On ICU PErformance (TELESCOPE): protocol for a cluster-randomised clinical trial on adult general ICUs in Brazil
Source: PubMed Central journal article supplement — BMJ Open. 2021 Jun 21;11(6):e042302. doi: 10.1136/bmjopen-2020-042302 (PMC8217943; doi:10.1136/bmjopen-2020-042302), 2021-06-21
Supplement: bmjopen-2020-042302.draft_revisions.pdf [file bmjopen-2020-042302.draft_revisions.pdf]

# BMJ Open

BMJ Open is committed to open peer review. As part of this commitment we make the peer review history of every article we publish publicly available.

When an article is published we post the peer reviewers' comments and the authors' responses online. We also post the versions of the paper that were used during peer review. These are the versions that the peer review comments apply to.

The versions of the paper that follow are the versions that were submitted during the peer review process. They are not the versions of record or the final published versions. They should not be cited or distributed as the published version of this manuscript.

BMJ Open is an open access journal and the full, final, typeset and author-corrected version of record of the manuscript is available on our site with no access controls, subscription charges or pay-per-view fees (<http://bmjopen.bmj.com>).

If you have any questions on BMJ Open's open peer review process please email [info.bmjopen@bmj.com](mailto:info.bmjopen@bmj.com)

# BMJ Open

## TELE-critical care verSus usual Care On ICU Performance (TELESCOPE): protocol for a cluster-randomised clinical trial on adult general ICUs in Brazil

|                               |                                                                                                                                                                                                                                                                                                                                                                                                                                                                                                                                                                                                                                                                                                                                                                                                                                                                                                                                                                                                                                                                                                                                                                                                                                                                                                                                                                                                                                                                                                                                                                                                                                 |
|-------------------------------|---------------------------------------------------------------------------------------------------------------------------------------------------------------------------------------------------------------------------------------------------------------------------------------------------------------------------------------------------------------------------------------------------------------------------------------------------------------------------------------------------------------------------------------------------------------------------------------------------------------------------------------------------------------------------------------------------------------------------------------------------------------------------------------------------------------------------------------------------------------------------------------------------------------------------------------------------------------------------------------------------------------------------------------------------------------------------------------------------------------------------------------------------------------------------------------------------------------------------------------------------------------------------------------------------------------------------------------------------------------------------------------------------------------------------------------------------------------------------------------------------------------------------------------------------------------------------------------------------------------------------------|
| Journal:                      | <i>BMJ Open</i>                                                                                                                                                                                                                                                                                                                                                                                                                                                                                                                                                                                                                                                                                                                                                                                                                                                                                                                                                                                                                                                                                                                                                                                                                                                                                                                                                                                                                                                                                                                                                                                                                 |
| Manuscript ID                 | bmjopen-2020-042302                                                                                                                                                                                                                                                                                                                                                                                                                                                                                                                                                                                                                                                                                                                                                                                                                                                                                                                                                                                                                                                                                                                                                                                                                                                                                                                                                                                                                                                                                                                                                                                                             |
| Article Type:                 | Protocol                                                                                                                                                                                                                                                                                                                                                                                                                                                                                                                                                                                                                                                                                                                                                                                                                                                                                                                                                                                                                                                                                                                                                                                                                                                                                                                                                                                                                                                                                                                                                                                                                        |
| Date Submitted by the Author: | 02-Jul-2020                                                                                                                                                                                                                                                                                                                                                                                                                                                                                                                                                                                                                                                                                                                                                                                                                                                                                                                                                                                                                                                                                                                                                                                                                                                                                                                                                                                                                                                                                                                                                                                                                     |
| Complete List of Authors:     | Noritomi, Danilo; Hospital Israelita Albert Einstein, Critical Care; Rede Impar, Práticas Clínicas<br>Ranzani, Otavio; Universidade de Sao Paulo Faculdade de Medicina Hospital das Clinicas, Pulmonary Division, Heart Institute, Hospital das Clinicas, University of Sao Paulo, Sao Paulo, Brazil; Barcelona Institute for Global Health, ISGlobal<br>Ferraz, Leonardo; Hospital Israelita Albert Einstein, Critical Care dos Santos, Maura<br>Cordioli, Eduardo; Hospital Israelita Albert Einstein, Critical Care Albaladejo, Renata; Hospital Israelita Albert Einstein, Critical Care Serpa Neto, Ary; Hospital Israelita Albert Einstein, Critical Care; BRICNET<br>Correa, Thiago; ICU, Hospital Israelita Albert Einstein, São Paulo, Brazil; BRICNET<br>Berwanger, Otávio; Hospital Israelita Albert Einstein de Morais, Lúbia; Hospital Israelita Albert Einstein, Critical Care Schettino, Guilherme; Hospital Israelita Albert Einstein, Critical Care Cavalcanti, Alexandre ; HCor Research Institute; BRICNET<br>Biondi, Rodrigo; Instituto de Cardiologia do Distrito Federal; Hospital Brasília<br>Rosa, Regis Goulart; H MV, Intensive Care; BRICNET<br>Salluh, Jorge; Department of Critical Care and Graduate Program in Translational Medicine, D'Or Institute for Research and Education, Rio de Janeiro, Brazil; BRICNET<br>Azevedo, Luciano Cesar; Hospital Sírio-Libanês, Intensive Care Unit; University of Sao Paulo, Emergency Medicine Department<br>Pereira, Adriano; Hospital Israelita Albert Einstein, Critical Care; Universidade Federal de Lavras, Postgraduate Program of Health Sciences |
| Keywords:                     | Telemedicine < BIOTECHNOLOGY & BIOINFORMATICS, Quality in health care < HEALTH SERVICES ADMINISTRATION & MANAGEMENT, INTENSIVE & CRITICAL CARE                                                                                                                                                                                                                                                                                                                                                                                                                                                                                                                                                                                                                                                                                                                                                                                                                                                                                                                                                                                                                                                                                                                                                                                                                                                                                                                                                                                                                                                                                  |
|                               |                                                                                                                                                                                                                                                                                                                                                                                                                                                                                                                                                                                                                                                                                                                                                                                                                                                                                                                                                                                                                                                                                                                                                                                                                                                                                                                                                                                                                                                                                                                                                                                                                                 |

1  
2  
3  
4  
5  
6  
7  
8  
9  
10  
11  
12  
13  
14  
15  
16  
17  
18  
19  
20  
21  
22  
23  
24  
25  
26  
27  
28  
29  
30  
31  
32  
33  
34  
35  
36  
37  
38  
39  
40  
41  
42  
43  
44  
45  
46  
47  
48  
49  
50  
51  
52  
53  
54  
55  
56  
57  
58  
59  
60

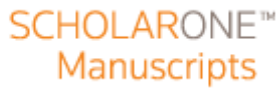

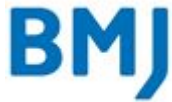

I, the Submitting Author has the right to grant and does grant on behalf of all authors of the Work (as defined in the below author licence), an exclusive licence and/or a non-exclusive licence for contributions from authors who are: i) UK Crown employees; ii) where BMJ has agreed a CC-BY licence shall apply, and/or iii) in accordance with the terms applicable for US Federal Government officers or employees acting as part of their official duties; on a worldwide, perpetual, irrevocable, royalty-free basis to BMJ Publishing Group Ltd ("BMJ") its licensees and where the relevant Journal is co-owned by BMJ to the co-owners of the Journal, to publish the Work in this journal and any other BMJ products and to exploit all rights, as set out in our [licence](#).

The Submitting Author accepts and understands that any supply made under these terms is made by BMJ to the Submitting Author unless you are acting as an employee on behalf of your employer or a postgraduate student of an affiliated institution which is paying any applicable article publishing charge ("APC") for Open Access articles. Where the Submitting Author wishes to make the Work available on an Open Access basis (and intends to pay the relevant APC), the terms of reuse of such Open Access shall be governed by a Creative Commons licence – details of these licences and which [Creative Commons](#) licence will apply to this Work are set out in our licence referred to above.

Other than as permitted in any relevant BMJ Author's Self Archiving Policies, I confirm this Work has not been accepted for publication elsewhere, is not being considered for publication elsewhere and does not duplicate material already published. I confirm all authors consent to publication of this Work and authorise the granting of this licence.

## TITLE PAGE:

**TELE-critical care verSus usual Care On ICU PErformance  
(TELESCOPE): protocol for a cluster-randomised clinical trial on adult  
general ICUs in Brazil**

**Danilo Teixeira Noritomi<sup>1,2,3\*</sup>; Otavio T. Ranzani<sup>4,5\*</sup>; Leonardo Jose Rolim Ferraz<sup>1</sup> ; Maura Cristina dos Santos<sup>1</sup>; Eduardo Cordioli<sup>1</sup>, Renata Albaladejo<sup>1</sup>; Ary Serpa Neto<sup>1,6</sup>; Thiago Domingos Corrêa<sup>1,6</sup>; Otávio Berwanger<sup>1</sup>, Lúbia Caus de Moraes<sup>1</sup>; Guilherme Schettino<sup>1</sup>, Alexandre Biasi Cavalcanti<sup>6,7</sup>, Regis Goulart Rosa<sup>6,9</sup>, Rodrigo Santos Biondi<sup>8</sup>, Jorge Salluh<sup>6,10</sup>, Luciano Azevedo<sup>6,11,12</sup>, Adriano José Pereira<sup>1,2,13,14</sup>, On behalf of the TELESCOPE Trial Investigators**

1. Tele-ICU Department, Hospital Israelita Albert Einstein, São Paulo, SP, Brazil.
2. Department of Critical Care Medicine, Hospital Israelita Albert Einstein, São Paulo, SP, Brazil
3. Quality and Patient Safety Department, Rede Ímpar, São Paulo, SP, Brazil
4. Pulmonary Division, Heart Institute (InCor), Hospital das Clínicas HCFMUSP, Faculdade de Medicina, Universidade de Sao Paulo, São Paulo, Brazil.
5. Barcelona Institute for Global Health, ISGlobal, Barcelona, Spain
6. Brazilian Research in Intensive Care Network (BRICNet)
7. HCor Research Institute, São Paulo, Brazil.
8. Instituto de Cardiologia do Distrito Federal e Hospital Brasília, Rede Ímpar, Brasília (DF), Brasil.
9. Critical Care Department, Hospital Moinhos de Vento, Porto Alegre, RS, Brazil
10. D'or Institute for Research and Education, Rio De Janeiro, Brazil.
11. University of Sao Paulo, Emergency Medicine Department, Sao Paulo, Sao Paulo, Brazil.
12. Hospital Sirio-Libanês, Instituto Sirio-Libanês de Ensino e Pesquisa, Sao Paulo, Sao Paulo, Brazil.
13. Hospital Municipal da Vila Santa Catarina, São Paulo, SP, Brazil.
14. Postgraduate Program of Health Sciences, Universidade Federal de Lavras/MG – Brazil.

\* DTN and OTR contributed equally to this paper.

1  
2  
3 **Research registry:** NCT03920501  
4

5 **Corresponding author:** Danilo Teixeira Noritomi  
6

7 Intensive Care Unit, Hospital Israelita Albert Einstein, São Paulo, SP.  
8

9 **E-mail:** dnoritomi@hotmail.com  
10

11  
12 **Word count:** 3797/ 4000  
13  
14  
15  
16  
17  
18  
19  
20  
21  
22  
23  
24  
25  
26  
27  
28  
29  
30  
31  
32  
33  
34  
35  
36  
37  
38  
39  
40  
41  
42  
43  
44  
45  
46  
47  
48  
49  
50  
51  
52  
53  
54  
55  
56  
57  
58  
59  
60

For peer review only

**ABSTRACT** (word count: 298/300)

**Introduction** – The number of patients requiring admission to Intensive Care Units (ICUs) is increasing worldwide. Brazil is a developing country which suffers from consequences of demographic and epidemiological transitions in a scenario of great regional disparities and shortage of intensive care specialised physicians.

**Methods and analysis** - A multicentre, controlled, cluster-randomised superiority trial including 30 ICUs in Brazil (15 intervention and 15 control), from August 2019 to December 2020. In a parallel assignment, ICUs are randomised to a complex-intervention composed by daily rounds carried out through Tele-ICU by a remote ICU physician; development of local quality indicators dashboards coupled with monthly meetings with local leadership; and dissemination of evidence-based clinical protocols *versus* usual care. Primary outcome is ICU length of stay. Secondary outcomes include classification of the unit according to the profiles defined by the standardized resource use and the standardized mortality rate, hospital mortality, incidence of healthcare-associated infections, ventilator-free days at 28 days, patient-days receiving oral or enteral feeding, patient-days under light sedation or alert and calm, rate of patients under normoxaemia. All adult patients admitted after the beginning of the study in each participant ICU will be enrolled. Inclusion criteria (clusters): public Brazilian ICUs with a minimum of 8 ICU beds interested/committed to participating in the study. Exclusion criteria (clusters): units with fully established daily multidisciplinary rounds by an intensivist, specialized units (e.g., ICUs admitting exclusively cardiac surgical) or step-down units.

**Ethics and dissemination** - The study protocol was approved by the IRB of the Hospital Israelita Albert Einstein (coordinator centre), and by IRBs of each enrolled hospital/ICU. Statistical Analysis Protocol is being prepared for submission before the end of patient's enrolment. Results will be disseminated through conferences, peer-reviewed journals and to each participating unit.

**Trial registration number** - NCT03920501

**Keywords:** Telemedicine, Tele-ICU, Quality Improvement, Intensive Care.

**ARTICLE SUMMARY:**

**Strengths and limitations of this study** (Up to five short bullet points, no longer than one sentence each, that relate specifically to the methods)

- TELESCOPE is the first, large, multicentre cluster randomised trial performed in a middle-income country evaluating if a complex-intervention delivered mainly by TELE-ICU physician and aiming to optimize the care of critically ill patients impacts clinical outcomes.
- TELESCOPE trained general board-certified ICU physicians to deliver TELE-ICU consultancy and provide performance feedback to the attending team and managers, aiming a scalable intervention.
- TELESCOPE used a baseline period as reference for randomisation, by using a minimization algorithm in order to achieve balance between arms and decrease within cluster variability.
- TELESCOPE intervention occurs only inside the ICU and an expected limitation is that length-of-stay depends on factors outside the ICU, such as ward bed availability,



## INTRODUCTION

Healthcare demand for critically ill patients admitted to Intensive Care Units (ICUs) has been expanding worldwide, causing great social impact.<sup>1-3</sup> Several factors have contributed to it, such as population ageing,<sup>4</sup> a higher prevalence of chronic diseases, among others.<sup>3 5</sup> Brazil is especially sensitive to this issue as it experiences great regional disparities and population ageing without adequate control of the main health determinants.<sup>6-9</sup> Such situation has resulted in a large number of frail elderly, who often require critical care due to acute aggravations in chronic conditions.<sup>10-12</sup> This scenario combined with the risk of spending a significant amount of money with suboptimal return for the society, justifies seeking efficient care for severely ill patients.<sup>13</sup>

Daily multidisciplinary round (DMR) is an approach that optimizes the ICU care. DMRs consists of systematic patient-centred discussions aiming to establish joint therapeutic goals for the next 24 hours of ICU care.<sup>14</sup> In different studies, DMR has been associated to better clinical outcomes.<sup>15 16</sup> However, full implementation of DMR is still challenging, since DMR must contain several attributes in order to maximize its results: its multidisciplinary character; proper settings; time and team standardizations; definition of roles; use of guiding tools; reduction of interruptions and focus on documented objectives.<sup>14</sup>

Telecommunication use for health care practice has been described since the advent of telecommunication.<sup>17</sup> The availability of high-speed data traffic has expanded the boundaries of Telemedicine, allowing the emergence of the first trial with critically ill patients in 1977.<sup>18</sup> In recent years, the use of Telemedicine in critically ill patients, known as tele-ICU, has gained relevance.<sup>19</sup> Specifically in the US, the number of ICU beds with some form of Telemedicine coverage has reached at least 15%.<sup>20 21</sup> There is a variety of possible tele-ICU applications, such as second opinion consultations in specific cases, monitoring of vital signs,

1  
2  
3 real-time performance and DMR conducted by a remotely located medical specialist.<sup>22 23</sup> .  
4  
5 However, the benefit of tele-ICU lacks high quality scientific evidence, particularly outside  
6  
7 high-income countries.<sup>24 25</sup> Furthermore, most of the studies published so far address  
8  
9  
10 Telemedicine in ICUs using vital signs monitoring and a continuous response system in a costly  
11  
12 way.<sup>26</sup> Thus, little is known about the use of Telemedicine focused primarily on supporting  
13  
14 DMR, which is understood to be both effective and more feasible from the economic  
15  
16 perspective.  
17  
18  
19  
20  
21  
22

## 23 **METHODS AND ANALYSIS**

### 24 ***Aim and objectives***

25  
26  
27  
28  
29  
30 The TELESCOPE trial aims to answer to the following research question: Does a complex  
31  
32 intervention offered by tele-ICU, focused on DMR attended by remote intensivists, improve  
33  
34 ICU efficiency of adult general units in Brazil?  
35  
36  
37  
38  
39

### 40 ***Primary Goal***

- 41  
42 - To evaluate whether an intervention consisting of guided DMRs, supported by a  
43  
44 remote specialist (intensivist) through Telemedicine and audit / feedback on care  
45  
46 performance will reduce ICU length of stay compared to a control group.  
47  
48

### 49 ***Secondary goals***

- 50  
51  
52 - To evaluate whether an intervention consisting of guided DMRs, supported by a  
53  
54 remote specialist (intensivist) through Telemedicine and audit / feedback on care  
55  
56 performance improves indicators of ICU performance compared to a control group.  
57  
58  
59  
60

### **Study design and setting**

The TELESCOPE trial is a national, multi-centre, controlled, open label, cluster randomised trial. The study tests the effectiveness of daily multidisciplinary rounds conducted by an intensivist through Telemedicine in Brazilian ICUs. Approximately 15,000 patients are expected to be recruited for a period of 18 months in 30 Brazilian ICUs (Figure 1).

After a 2-month observation period (baseline period) in which performance indicators for eligible ICUs is collected without any intervention (with the purpose of obtaining data for randomisation and characterization of the initial ICU status), the ICUs eligible for the study are randomised to either receive DMRs conducted by an intensivist through Telemedicine, from Monday to Friday, in addition to a monthly discussion of care performance indicators performed through virtual meetings (Intervention Group), or receive the unit's usual care (Control Group) (Figure 2). ICU board certified physicians receives a multicomponent training before starting the TELE-ICU DMR, comprising empathy and communication and quality improvement (Figure 3). The study protocol was registered in the Clinicaltrials.Gov (NCT03920501). The study protocol follows the recommendations of the SPIRIT 2013 Statement.<sup>27</sup>

### **Intervention**

#### *Intervention group (Tele-UTI) (Table 1)*

Trial intervention consists of:

1. *Daily multidisciplinary rounds (DMR) led by remote intensivists.* Discussions are conducted by an intensivist located in a remote centre (tele-intensivist) and the local multidisciplinary team (doctor, nurse and physiotherapist). DMRs takes place from

1  
2  
3 Monday to Friday, in predetermined hours (mostly during the mornings), using  
4 Telemedicine equipment, and approach every patient admitted to the participating  
5 ICUs. The main objective of DMR conducted by a tele-intensivist is to discuss  
6 diagnostic hypotheses, active problems and create a treatment plan until the next  
7 DMR. Tele-intensivists make recommendations based on updated scientific evidence,  
8 suitable to the local context. Clinical protocols in texts and videos formats (developed  
9 and used during the tele-intensivists training period) were made available to  
10 physicians and multidisciplinary team of the ICUs in the intervention arm, right after  
11 randomisation and establishment of a DMR routine. Electronic forms for patient  
12 follow-up serves as a guideline (Index) and are filled out by tele-intensivists. According  
13 to the current regulation (national resolution from the Brazilian Federal Council of  
14 Medicine, CFM Resolution 1643 of 2002), tele-intensivists does not act directly upon  
15 patients, but are rather mediated by the local team. Therefore, the local healthcare  
16 practitioners implement the treatment plan. Indicators of adherence to  
17 recommendations made by tele-intensivists are registered. Tele-intensivists do not  
18 write medical prescriptions, nor gives direct orders to the local care team for  
19 procedures or interventions. DMRs may be postponed, interrupted or suspended in  
20 case of urgency / medical emergency situations that may hinder participation of local  
21 doctors.

- 22  
23  
24  
25  
26  
27  
28  
29  
30  
31  
32  
33  
34  
35  
36  
37  
38  
39  
40  
41  
42  
43  
44  
45  
46  
47  
48  
49  
50  
51  
52 2. *Management of ICU performance indicators.* The variables collected for the trial (table  
53 1) are presented aggregately in reports available for each coordinator of the  
54 participating ICUs as well as for tele-intensivists. Data from Case Report Forms - CRFs  
55 (REDCap®, Vanderbilt University Medical Center, TN, USA) are used to automatically  
56  
57  
58  
59  
60

1  
2  
3 feed dashboards in real-time, specially developed for this purpose (R Studio/Shiny®,  
4 Boston, MA, USA). In addition, monthly remote meetings between the local ICU team  
5 and the respective tele-intensivist are organized to discuss these indicators and to  
6 establish possible improvement action plans.  
7  
8  
9  
10  
11  
12  
13  
14

### 15 *Control Group (usual care)*

16  
17 No interventions are delivered to the ICUs randomised to the control group, with the  
18 exception of the systematic data collection required for the comparisons described in the trial  
19 objectives. However, unlike in the ICUs of the intervention group, these indicators are not  
20 available for the care team nor to the coordination of the participating ICUs.  
21  
22  
23  
24  
25  
26  
27  
28  
29

### 30 **Sites**

31  
32 The list of potential units was retrieved from the national registry of health facilities  
33 (“Cadastro Nacional de Estabelecimentos de Saúde – CNES”, in Portuguese), filtering those  
34 facilities with at least 8 ICU adult beds available.  
35  
36  
37  
38  
39  
40  
41  
42

### 43 **Inclusion/Exclusion**

44  
45 The ICUs are invited by electronic means for an interview in which the eligibility and feasibility  
46 criteria below will be verified.  
47  
48  
49  
50  
51

### 52 *Inclusion criteria for ICUs*

- 53 • ICUs of public or philanthropic hospitals
  - 54 • ICUs with a minimum of 8 ICU beds
  - 55 • ICUs with on-site doctors and nurses
- 56  
57  
58  
59  
60

### *Exclusion criteria for ICUs*

- ICUs that already presented DMRs, defined as:
  - Meetings (DMRs)  $\geq 3$  times per week, during weekdays, conducted by a certified intensivist and documented in medical records with fixed visit length ( $>5$  min / patient), using some supporting tool (checklist or standard form), goal-oriented, based on established protocols, including all the patients admitted to the ICU.
  - or
  - Monthly management of indicators (audit and feedback) with specific planning.
- Specialized ICUs (ICUs admitting exclusively cardiac surgery, neurological, burned patients).
- Step-down units or coronary units

### ***Patients***

All consecutive patients that fulfil the inclusion criteria and none of the exclusion criteria will be enrolled.

### **Inclusion/Exclusion**

The patients admitted in the ICU who currently meet the following inclusion criteria are included:

- Age  $\geq 18$  years old
- Patients admitted to the ICU after the beginning of the trial

### *Exclusion criteria for patients*

- Patients admitted to the ICU due to justice-related issues (since in such circumstances the ICU admission or discharge may be determined by law and not medical reasons)
- Patients previously included in the TELESCOPE trial (for the analysis of the primary outcome).

### **Randomisation**

The 30 ICUs are randomly assigned to either the intervention group (n=15) or the control group (n=15) using a restricted randomisation approach to ensure balance across the groups.<sup>28 29</sup> The randomisation unit will be the ICU to avoid contamination of the intervention. Only one ICU per hospital will be included in the trial. The randomisation is performed in blocks, sizes of 14, 7 and 9, following the completion of the baseline period. To ensure allocation concealment, the statistician responsible for the randomisation list receives only the ICU identifier code, being unaware of which unit it refers to. The allocation list is sent to the study coordinator, who informs the ICUs about the randomisation. The allocation will be maintained until the end of the study.

### **Blinding**

The intervention is open, due to the nature of the study (Tele-ICU rounds, quality improvement meetings and delivery of evidence-based clinical protocols). The steering and scientific committees are blinded of the DMRs and monthly feedback/audit meetings.

### **Follow-up**

1  
2  
3 Patients are followed up until hospital discharge by the health care worker responsible for  
4  
5 data collection.  
6  
7  
8  
9  
10  
11  
12

### 13 **Outcomes**

#### 14 15 Primary outcome

16  
17 At an individual level, the primary outcome of this trial is ICU length of stay, measured in days,  
18  
19 taking into account the time interval in hours between patients' ICU admission and time of  
20  
21 transfer to another care facility or another hospital, as defined by the hospital's system date  
22  
23 and time. Date and time will be entered by the health care worker responsible for data  
24  
25 collection.  
26  
27  
28  
29  
30  
31

#### 32 Secondary exploratory outcomes

33  
34 The secondary outcomes of this study include assessing the impact of interventions  
35  
36 implemented through Telemedicine compared to a control group in the following outcomes:  
37  
38

- 39  
40 • Classification of the unit according to the profiles defined by the standardized  
41  
42 resource use (SRU) and the standardized mortality rate (SMR).<sup>30</sup> The SRU reflects the  
43  
44 observed / expected rate of resources used (estimated as ICU length of stay for  
45  
46 surviving patients), adjusted by patient's severity of illness.<sup>31 32</sup> The SMR reflects the  
47  
48 observed / expected rate (according to severity score) of hospital deaths. The profiles  
49  
50 are a combination of SMR (above or below median) and SRU (above or below median)  
51  
52 : Each unit can be assigned to one of four groups: "most efficient" (SMR and SRU <  
53  
54 median); "least efficient" (SMR, SRU > median); "overachieving" (low SMR, high SRU),  
55  
56 "underachieving" (high SMR, low SRU)<sup>31</sup>  
57  
58  
59  
60



- 1
- 2
- 3
- 4
- 5
- 6
- 7
- 8
- 9
- 10
- 11
- 12
- 13
- 14
- 15
- 16
- 17
- 18
- 19
- 20
- 21
- 22
- 23
- 24
- 25
- 26
- 27
- 28
- 29
- 30
- 31
- 32
- 33
- 34
- 35
- 36
- 37
- 38
- 39
- 40
- 41
- 42
- 43
- 44
- 45
- 46
- 47
- 48
- 49
- 50
- 51
- 52
- 53
- 54
- 55
- 56
- 57
- 58
- 59
- 60
- In-hospital mortality, defined as death by any cause from date of ICU admission until the date of hospital discharge or death, whichever comes first
- Incidence of central line-associated bloodstream infection (CLABSI), as defined by the CDC<sup>33</sup>
- Incidence of ventilator-associated event (VAE), as defined by the CDC<sup>34</sup>
- Incidence of catheter-associated urinary tract infection (CAUTI), as defined by the CDC<sup>35</sup>
- Ventilator-free days at 28 days, defined as the number of days from successfully weaning to day 28; patients who died before weaning were deemed to have no ventilator-free days
- Patient-days receiving oral or enteral feeding, defined as any amount oral or enteral diet
- Patient-days under light sedation or alert and calm [Richmond Agitation-Sedation Scale (RASS) = -3 to +1]
- Rate of patients under normoxaemia [peripheral oxygen saturation (SpO<sub>2</sub>) between 92% and 96%]

#### *Other exploratory outcomes*

Other outcomes, considered merely exploratory, will be observed:

- ICU mortality
- 24-hour ICU readmission rate
- Proportion of mechanical ventilation (MV) use
- Early reintubation rate (<48h after extubation)
- Accidental extubation rate

- Compliance to head of bed elevation for patient under MV
- Rate of central venous catheter (CVC) use and duration
- Rate of urinary catheter use and duration
- Adequate prevention of venous thromboembolism (VTE)
- Rate of patients with adequate glycaemic control

### **Data collection**

At the patient level, the following data is collected (Table 2):

*At the time of ICU admission:*

- Identifier, date of birth, gender, main reason of ICU admission (adapted from APACHE III),<sup>36</sup> readmission status
- Anthropometric characteristics, comorbidities (adapted from SAPS3),<sup>37</sup> functional status (adapted from ECOG)<sup>37</sup>
- Respiratory, cardiovascular, and renal support
- Diet and sedation status
- Presence of devices: central venous catheter, arterial line, permanent catheters, urinary catheter, oro/naso-tracheal catheter and tracheostomy
- Date and time of hospital admission
- Date and time of ICU admission
- Simplified Acute Physiology (SAPS 3) score<sup>32</sup>
- Sequential organ failure assessment (SOFA) score<sup>38 39</sup>

*Throughout the ICU admission:*

- 1
- 2
- 3 • Documented goals from the DMR
- 4
- 5
- 6 • Documented discharge order status, defined as any mention to readiness to discharge
- 7
- 8 or ICU transference order
- 9
- 10
- 11 • MV status and mechanical ventilation parameters
- 12
- 13 • SpO<sub>2</sub> range for patients on oxygen therapy
- 14
- 15
- 16 • Head of bed elevation for patients under MV
- 17
- 18 • Spontaneous respiratory test, accidental extubation or re-intubation events
- 19
- 20
- 21 • Need of vasoactive drugs and renal replacement therapy
- 22
- 23 • Continuous sedative infusion and light sedation strategy (reduction/daily
- 24 interruption)
- 25
- 26
- 27
- 28 • Daily value (categorized below, above or within -3 to +1 range) of the RASS for patients
- 29
- 30 undergoing continuous sedation at a predetermined time
- 31
- 32
- 33 • Adequacy of VTE prophylaxis
- 34
- 35
- 36 • Presence of oral or enteral nutrition
- 37
- 38
- 39 • Glycaemic control
- 40
- 41 • Notification of health-care-related infection episodes according to CDC (Centers for
- 42 Disease Control and Prevention) criteria:
- 43
  - 44 ○ Central-line associated bloodstream infection (CLABSI)<sup>33</sup>
  - 45
  - 46 ○ Ventilator-associated events (VAE)<sup>34</sup>
  - 47
  - 48 ○ Catheter-associated urinary tract infection (CAUTI)<sup>35</sup>
  - 49
  - 50 ○ Date and time of central venous catheter (CVC) insertion for patients
  - 51
  - 52 undergoing CVC insertion
  - 53
  - 54
  - 55
  - 56
  - 57
  - 58 • Date and time of withdrawal of CVC for patients undergoing CVC insertion
  - 59
  - 60

- Date and time of indwelling urinary catheter (IUC) insertion for patients submitted to IUC insertion
- Date and time of withdrawal of IUC for patients undergoing IUC insertion
- Documentation of decisions for limiting the life support considering any mention to withholding or withdrawing in the medical records

#### *At the time of ICU discharge*

- Date and time of ICU discharge
- ICU outcome: discharge to ward, hospital transfer, death

#### *At the time of hospital discharge*

- Date and time of hospital discharge
- Hospital outcome: hospital transfer, death

### **Data collection and management**

Trained health care workers collect data, without any involvement from the study committees and investigators. We developed a standard CRFs for the trial, with extensive validation and piloting aiming clarity and consistency.

Data is input using electronic CRFs in the Research Electronic Data Capture system (REDCap®, USA) via Internet and hosted on a server at the Hospital Israelita Albert Einstein/São Paulo - Brazil. Medical data from tele-intensivist consultations is generated and stored using a specific platform developed by the Tele-ICU Department of the Hospital Israelita Albert Einstein/São Paulo - Brazil. Images and audio are never saved or stored. The

1  
2  
3 electronic files are stored in the hospital's servers in a controlled and secure environment to  
4  
5 guarantee confidentiality. Furthermore, access to all documents is user and password  
6  
7 controlled. To ensure data quality, the following procedures are performed:  
8  
9

- 10 • All professionals responsible for data collection are trained before the beginning of  
11 the trial in order to guarantee clear definitions for accurate data collection;  
12
- 13 • A research nurse from the Coordinating Centre is available 24/7 to solve any problem  
14 and question about data collection;  
15
- 16 • Data input in the system are submitted to near real-time verifications to detect  
17 missing data, values outside expected and logic patterns;  
18
- 19 • Remote data monitoring is performed regularly to detect patterns of anomalies,  
20 consistency or credibility problems and other anomalies – according to pre-  
21 established queries created by the system. Any missing data or outlier is individually  
22 reviewed for inspection;  
23
- 24 • The Coordinating Centre reviews follow-up reports regularly to ensure their  
25 consistency and completeness;  
26
- 27 • Centre monitoring is performed while the study is being conducted. A trained  
28 professional is assigned by the Coordinating Centre to monitor the study participating  
29 centres. All the information obtained during the monitoring visits are strictly  
30 confidential.  
31  
32  
33  
34  
35  
36  
37  
38  
39  
40  
41  
42  
43  
44  
45  
46  
47  
48  
49  
50  
51  
52  
53  
54  
55  
56  
57  
58  
59  
60

## Monitoring

### *Interim analyses*

Since our intervention gathers the best available evidence for care of critically ill patients admitted to the ICUs, and we do not predict inherent risks in the performance of the trial, interim analyses are not planned.

### *Intervention Monitoring*

Considering the study aim is to evaluate the impact of a complex intervention (composed by DMR, management of ICU performance indicators, and provision of clinical protocols), specific data (implementation indicators) will be collected and followed in order to ensure adherence to the protocol:

- a) DMR rate per site/bed/day, and DMR duration (including individual and periodic feedback to each tele-intensivist).
- b) Rate of recommendations made, and validated (accepted and not accepted) / DMR
- c) Monthly meeting on performance indicators reports: tele-intensivists will send to study team monthly reports including the executive summary (file sent to the leaderships of each study center/intervention arm, before the monthly meeting) and the meeting record file (structured data about highlighted indicators, action plan, responsibility, and due dates).
- d) Access to the clinical protocols: absolute number of accesses to the video-protocols will be provided and followed.

### *Power/Sample size calculation*

We estimated a mean ICU length-of-stay of 8 [standard deviation (SD) 10] days for general adult public ICUs in Brazil. We used data from published literature and reports from the online

1  
2  
3 project “UTIs Brasileiras”.<sup>40</sup> Using data from 20 ICUs (10 ICUs from Ranzani et al,<sup>41</sup> 10 ICUs  
4  
5 from the ORCHESTRA study,<sup>42</sup> available in the *ems* R package), we estimated an intraclass  
6  
7 correlation coefficient of 0.018. Considering a two-arm cluster trial with an ICC of 0.018, for  
8  
9 a minimum difference of an average length of stay of 1.5 days (8.0 to 6.5 days) and SD of 10  
10  
11 days, power 80%, alpha 5%, we would need a total of 30 clusters (15 intervention units and  
12  
13 15 control units) with an average cluster size of 500 patients per ICU over a period of 18  
14  
15 months. If we use a coefficient of variation of cluster size, estimated by the expected  
16  
17 minimum and maximum method, we will maintain 80% power if the difference between the  
18  
19 clusters minimum and maximum size is 150 patients. If needed, after the baseline period, we  
20  
21 might review the sample calculation and simulate the power for secondary outcomes, using  
22  
23 the data from the selected ICUs.  
24  
25  
26  
27  
28

### 30 **Analysis**

31  
32 All analyses will be thoroughly described in a statistical analysis plan (SAP), which will be  
33  
34 concluded and submitted for publishing prior to database closure and the beginning of  
35  
36 analyses. Primary statistical analyses will be performed according to the intention-to-treat  
37  
38 principle. All outcomes at the patient-level will be performed using models that account for  
39  
40 correlated data within each ICU (ie, ICU as a cluster) with generalised linear mixed models  
41  
42 and adjusted by pre-specified covariates, as will be specified in the SAP. Pre-specified  
43  
44 secondary outcomes and subgroup analyses will not be adjusted for multiple comparisons.  
45  
46 They should, therefore, be interpreted as exploratory. We pre-specified three subgroups:  
47  
48 type of admission (medical vs. surgical), by tertiles of SAPS3 and mechanical ventilation status  
49  
50 (invasive MV vs. not-invasive MV). Sub-groups will be analyzed as an interaction term.  
51  
52  
53  
54  
55

56  
57 We will evaluate the calibration of the SAPS3 model with data from the baseline  
58  
59 period. If necessary, we will recalibrate the model for the studied population. All analyses will  
60

1  
2  
3 be performed with program R (3.4.1 version, the version will be updated at the time of  
4  
5 analysis).  
6  
7  
8  
9

## 10 **ETHICS AND DISSEMINATION**

11  
12 The project was approved by local Research Ethics Committee (IRB) of the coordinating study  
13  
14 centre (Hospital Israelita Albert Einstein) (CAAE: 01523118.0.1001.0071) and by the local IRB  
15  
16 from each one of the 30 ICUs, following the Brazilian legislation. A specialist in regulatory  
17  
18 process will oversee and support the local process. Any modifications in the protocol that  
19  
20 might affect the development of the study and its potential benefits or safety, including  
21  
22 changes in the objectives, design, study population, sample size, interventions or relevant  
23  
24 management aspects, will require amendments to the protocol. Such amendments should be  
25  
26 submitted to the IRB of the coordinating centre and all the IRBs at the participating centre for  
27  
28 proper approval. There will be rigorous procedures of protocol version control.  
29  
30  
31  
32  
33

34  
35 The need for patients' written informed consent was waived in all 30 centres. For one  
36  
37 centre, it was requested written informed consent for health care professionals involved in  
38  
39 the tele-ICU visits. We obtained written agreement from the Director of each institution as  
40  
41 well as by the ICU coordinator.<sup>43-46</sup>  
42  
43  
44

45 All the information in the study will be stored (in paper and/or magnetic media) at  
46  
47 the coordinating centre. All patient-level data will be anonymized. Access to information  
48  
49 from the participants (during the visits) will be restricted to the intensivists performing daily  
50  
51 rounds via Telemedicine. All records with names or other identifiers will be stored separately  
52  
53 from the study records. Information on patients will not be disclosed except for regulatory  
54  
55 purposes.  
56  
57  
58  
59  
60



1  
2  
3 The TELESCOPE study Steering Committee commits to publishing the study results,  
4  
5 whatever they may be. The results of this study will be mainly disseminated through  
6  
7 international scientific publication. The main result of this project will be reported in an  
8  
9 article and sub-studies are planned. Results of this project are expected to be presented in  
10  
11 major sessions at national and international congresses, especially in the field of intensive  
12  
13 care medicine. Study results are expected to be promoted to the lay press and disseminated  
14  
15 in various media outlets due to its impact on the health system.  
16  
17  
18  
19  
20  
21  
22

### 23 **TRIAL STATUS**

24  
25 This paper presents the protocol for the TELESCOPE trial (original version, 1.0, approved in  
26  
27 07/11/2018). The baseline period started on 01/06/2019. First randomisation block and  
28  
29 interventions started in 05/08/2019. At the time of first version of the manuscript submission,  
30  
31 data collection for the trial was ongoing and due to be complete in December 2020.  
32  
33  
34  
35  
36  
37

### 38 **ADDITIONAL INFORMATION**

#### 39 40 41 42 **Funding**

43  
44 The study was conducted in partnership with the Brazilian Ministry of Health through the  
45  
46 Institutional Development Program of the Unified Health System (PROADI - SUS, NUP  
47  
48 25000.018804/2018-23.), and classified in one of the objectives of the National Health Plan,  
49  
50 highlighting the relevance and potential contribution of the project to the governance of the  
51  
52 SUS, according to the ordinance 3.362, 12/8/2017.  
53  
54  
55  
56  
57  
58  
59

#### 60 **Competing interests**

1  
2  
3 None declared.  
4  
5  
6  
7

### 8 **Patient consent** 9

10 Not required.  
11  
12  
13

### 14 **Patient and public involvement** 15

16  
17 This research was done without patient involvement in its design or development. Patients  
18 were not invited to contribute to the writing or editing of this document for readability or  
19 accuracy. This was due to logistic limitations (critical care patients in a national wide study).  
20  
21 Outcomes were chosen according to traditional indicators in the critical care area.  
22  
23  
24  
25  
26  
27  
28  
29

### 30 **Ethics approval** 31

32 This study will be conducted according to the resolution no 466/12 of the Brazilian National  
33 Health Council  
34  
35 (http://bvsmms.saude.gov.br/bvs/saudelegis/cns/2013/res0466\_12\_12\_2012.html). The  
36  
37 study protocol has been approved by the Research Ethics Committee of the coordinating site  
38  
39 (approval number: CAAE 01523118.0.1001.0071) and the Research Ethics Committees of all  
40  
41 participant institutions.  
42  
43  
44  
45  
46  
47  
48  
49

### 50 **Acknowledgments** 51

52 The authors would like to thank the central TELESCOPE team, data collection team of each  
53 participating ICU, as well as the Hospital Israelita Albert Einstein, the Brazilian Ministry of  
54 Health, and the Brazilian Research in Intensive Care Network (BRICNET) for their support in  
55  
56 conducting the study.  
57  
58  
59  
60

1  
2  
3  
4  
5  
6  
7  
8  
9  
10  
11  
12  
13  
14  
15  
16  
17  
18  
19  
20  
21  
22  
23  
24  
25  
26  
27  
28  
29  
30  
31  
32  
33  
34  
35  
36  
37  
38  
39  
40  
41  
42  
43  
44  
45  
46  
47  
48  
49  
50  
51  
52  
53  
54  
55  
56  
57  
58  
59  
60

For peer review only

## REFERENCES

1. Angus DC, Linde-Zwirble WT, Lidicker J, et al. Epidemiology of severe sepsis in the United States: analysis of incidence, outcome, and associated costs of care. *Crit Care Med* 2001;29(7):1303-10. [published Online First: 2001/07/11]
2. Rubenfeld GD, Caldwell E, Peabody E, et al. Incidence and outcomes of acute lung injury. *N Engl J Med* 2005;353(16):1685-93. doi: 353/16/1685 [pii] 10.1056/NEJMoa050333
3. Adhikari NK, Fowler RA, Bhagwanjee S, et al. Critical care and the global burden of critical illness in adults. *Lancet* 2010;376(9749):1339-46. doi: 10.1016/s0140-6736(10)60446-1 [published Online First: 2010/10/12]
4. Needham DM, Bronskill SE, Calinawan JR, et al. Projected incidence of mechanical ventilation in Ontario to 2026: Preparing for the aging baby boomers. *Crit Care Med* 2005;33(3):574-9. [published Online First: 2005/03/09]
5. Angus DC, Barnato AE, Linde-Zwirble WT, et al. Use of intensive care at the end of life in the United States: an epidemiologic study. *Crit Care Med* 2004;32(3):638-43.
6. Burden of disease in Brazil, 1990-2016: a systematic subnational analysis for the Global Burden of Disease Study 2016. *Lancet* 2018;392(10149):760-75. doi: 10.1016/s0140-6736(18)31221-2 [published Online First: 2018/07/25]
7. Barreto MdS, Carreira, L., & Marcon, S.S. Envelhecimento populacional e doenças crônicas: Reflexões sobre os desafios para o Sistema de Saúde Pública. *Revista Kairós Gerontologia* 2015;18(1) [published Online First: 339]
8. Lima-Costa MF, De Oliveira C, Macinko J, et al. Socioeconomic inequalities in health in older adults in Brazil and England. *American journal of public health* 2012;102(8):1535-41. doi: 10.2105/ajph.2012.300765 [published Online First: 2012/06/16]
9. Veras RP, Oliveira M. Aging in Brazil: the building of a healthcare model. *Ciencia & saude coletiva* 2018;23(6):1929-36. doi: 10.1590/1413-81232018236.04722018 [published Online First: 2018/07/05]
10. Ball IM, Bagshaw SM, Burns KE, et al. Outcomes of elderly critically ill medical and surgical patients: a multicentre cohort study. *Canadian journal of anaesthesia = Journal canadien d'anesthesie* 2017;64(3):260-69. doi: 10.1007/s12630-016-0798-4 [published Online First: 2016/12/29]
11. Chin-Yee N, D'Egidio G, Thavorn K, et al. Cost analysis of the very elderly admitted to intensive care units. *Crit Care* 2017;21(1):109. doi: 10.1186/s13054-017-1689-y [published Online First: 2017/05/17]
12. Zampieri FG, Iwashyna TJ, Vigiante EM, et al. Association of frailty with short-term outcomes, organ support and resource use in critically ill patients. *Intensive Care Med* 2018;44(9):1512-20. doi: 10.1007/s00134-018-5342-2
13. Valley TS, Noritomi DT. ICU beds: less is more? Yes. *Intensive Care Med* 2020 doi: 10.1007/s00134-020-06042-1
14. Lane D, Ferri M, Lemaire J, et al. A systematic review of evidence-informed practices for patient care rounds in the ICU\*. *Crit Care Med* 2013;41(8):2015-29. doi: 10.1097/CCM.0b013e31828a435f [published Online First: 2013/05/15]
15. Pronovost PJ, Angus DC, Dorman T, et al. Physician staffing patterns and clinical outcomes in critically ill patients: a systematic review. *JAMA* 2002;288(17):2151-62.
16. Kim MM, Barnato AE, Angus DC, et al. The effect of multidisciplinary care teams on intensive care unit mortality. *Arch Intern Med* 2010;170(4):369-76. doi: 10.1001/archinternmed.2009.521 [published Online First: 2010/02/24]
17. Medicine Io. Telemedicine: A Guide to Assessing Telecommunications for Health Care. Washington, DC: The National Academies Press 1996.

18. Grundy BL, Crawford P, Jones PK, et al. Telemedicine in critical care: an experiment in health care delivery. *Jacep* 1977;6(10):439-44. [published Online First: 1977/10/01]
19. Vranas KC, Slatore CG, Kerlin MP. Telemedicine Coverage of Intensive Care Units: A Narrative Review. *Annals of the American Thoracic Society* 2018 doi: 10.1513/AnnalsATS.201804-225FR [published Online First: 2018/08/10]
20. Kahn JM, Cicero BD, Wallace DJ, et al. Adoption of ICU telemedicine in the United States. *Crit Care Med* 2014;42(2):362-8. doi: 10.1097/CCM.0b013e3182a6419f [published Online First: 2013/10/23]
21. Lilly CM, Zubrow MT, Kempner KM, et al. Critical care telemedicine: evolution and state of the art. *Crit Care Med* 2014;42(11):2429-36. doi: 10.1097/ccm.0000000000000539 [published Online First: 2014/08/01]
22. Lilly CM, Fisher KA, Ries M, et al. A national ICU telemedicine survey: validation and results. *Chest* 2012;142(1):40-47. doi: 10.1378/chest.12-0310 [published Online First: 2012/04/21]
23. Fuhrman SA, Lilly CM. ICU Telemedicine Solutions. *Clinics in chest medicine* 2015;36(3):401-7. doi: 10.1016/j.ccm.2015.05.004 [published Online First: 2015/08/26]
24. Young LB, Chan PS, Lu X, et al. Impact of telemedicine intensive care unit coverage on patient outcomes: a systematic review and meta-analysis. *Arch Intern Med* 2011;171(6):498-506. doi: 10.1001/archinternmed.2011.61 [published Online First: 2011/03/30]
25. Wilcox ME, Adhikari NK. The effect of telemedicine in critically ill patients: systematic review and meta-analysis. *Crit Care* 2012;16(4):R127. doi: 10.1186/cc11429 [published Online First: 2012/07/20]
26. Chen J, Sun D, Yang W, et al. Clinical and Economic Outcomes of Telemedicine Programs in the Intensive Care Unit: A Systematic Review and Meta-Analysis. *J Intensive Care Med* 2018;33(7):383-93. doi: 10.1177/0885066617726942
27. Chan AW, Tetzlaff JM, Altman DG, et al. SPIRIT 2013 statement: defining standard protocol items for clinical trials. *Ann Intern Med* 2013;158(3):200-7. doi: 10.7326/0003-4819-158-3-201302050-00583 [published Online First: 2013/01/09]
28. Carter BR, Hood K. Balance algorithm for cluster randomized trials. *BMC Med Res Methodol* 2008;8:65. doi: 10.1186/1471-2288-8-65
29. Richards-Belle A, Mouncey PR, Wade D, et al. Psychological Outcomes following a nurse-led Preventative Psychological Intervention for critically ill patients (POPPI): protocol for a cluster-randomised clinical trial of a complex intervention. *BMJ Open* 2018;8(2):e020908. doi: 10.1136/bmjopen-2017-020908
30. Rapoport J, Teres D, Lemeshow S, et al. A method for assessing the clinical performance and cost-effectiveness of intensive care units: a multicenter inception cohort study. *Crit Care Med* 1994;22(9):1385-91. [published Online First: 1994/09/01]
31. Rothen HU, Stricker K, Einfalt J, et al. Variability in outcome and resource use in intensive care units. *Intensive Care Med* 2007;33(8):1329-36. doi: 10.1007/s00134-007-0690-3 [published Online First: 2007/06/02]
32. Moreno RP, Metnitz PG, Almeida E, et al. SAPS 3--From evaluation of the patient to evaluation of the intensive care unit. Part 2: Development of a prognostic model for hospital mortality at ICU admission. *Intensive Care Med* 2005;31(10):1345-55. doi: 10.1007/s00134-005-2763-5
33. Centers for Disease Control and Prevention. Bloodstream Infection Event (Central Line-Associated Bloodstream Infection and Non-central Line Associated Bloodstream Infection) 2018 [Available from:

- 1  
2  
3 [https://www.cdc.gov/nhsn/PDFs/pscManual/4PSC\\_CLABSCurrent.pdf](https://www.cdc.gov/nhsn/PDFs/pscManual/4PSC_CLABSCurrent.pdf) accessed  
4 September 2018.  
5  
6 34. Centers for Disease Control and Prevention. Pneumonia (Ventilator-associated [VAP] and  
7 non-ventilator-associated Pneumonia [PNEU]) Event 2018 [Available from:  
8 <https://www.cdc.gov/nhsn/pdfs/pscmanual/6pscvcapcurrent.pdf> accessed September  
9 2018.  
10  
11 35. Centers for Disease Control and Prevention. Urinary Tract Infection (Catheter-Associated  
12 Urinary Tract Infection [CAUTI] and Non-Catheter-Associated Urinary Tract Infection  
13 [UTI]) and Other Urinary System Infection [USI]) Events 2018 [Available from:  
14 <https://www.cdc.gov/nhsn/pdfs/pscmanual/7psccauticurrent.pdf> accessed September  
15 2018.  
16  
17 36. Knaus WA, Wagner DP, Draper EA, et al. The APACHE III prognostic system. Risk  
18 prediction of hospital mortality for critically ill hospitalized adults. *Chest*  
19 1991;100:1619-36.  
20  
21 37. Zampieri FG, Soares M, Borges LP, et al. The Epimed Monitor ICU Database(R): a cloud-  
22 based national registry for adult intensive care unit patients in Brazil. *Rev Bras Ter*  
23 *Intensiva* 2017;29(4):418-26. doi: 10.5935/0103-507X.20170062  
24  
25 38. Vincent JL, Moreno R, Takala J, et al. The SOFA (Sepsis-related Organ Failure  
26 Assessment) score to describe organ dysfunction/failure. On behalf of the Working  
27 Group on Sepsis-Related Problems of the European Society of Intensive Care  
28 Medicine. *Intensive Care Med* 1996;22:707-10.  
29  
30 39. Pandharipande PP, Shintani AK, Hagerman HE, et al. Derivation and validation of  
31 Spo2/Fio2 ratio to impute for Pao2/Fio2 ratio in the respiratory component of the  
32 Sequential Organ Failure Assessment score. *Crit Care Med* 2009;37(4):1317-21. doi:  
33 10.1097/CCM.0b013e31819cefa9  
34  
35 40. Society. TBCC. Brazilian ICUs Project. 2018 [Available from:  
36 [http://www.utisbrasileiras.com.br/perfis-das-utis/evolucao-do-smr-e-do-sruhospitar/  
37 -!/evolutivo-da-turp-sru-hospitarar](http://www.utisbrasileiras.com.br/perfis-das-utis/evolucao-do-smr-e-do-sruhospitar/-!/evolutivo-da-turp-sru-hospitarar)) accessed 01/09/2018.  
38  
39 41. Ranzani OT, Simpson ES, Augusto TB, et al. Evaluation of a minimal sedation protocol  
40 using ICU sedative consumption as a monitoring tool: a quality improvement  
41 multicenter project. *Crit Care* 2014;18(5):580. doi: 10.1186/s13054-014-0580-3  
42  
43 42. Soares M, Bozza FA, Angus DC, et al. Organizational characteristics, outcomes, and  
44 resource use in 78 Brazilian intensive care units: the ORCHESTRA study. *Intensive*  
45 *Care Med* 2015;41(12):2149-60. doi: 10.1007/s00134-015-4076-7  
46  
47 43. Hutton JL, Eccles MP, Grimshaw JM. Ethical issues in implementation research: a  
48 discussion of the problems in achieving informed consent. *Implementation science : IS*  
49 2008;3:52. doi: 10.1186/1748-5908-3-52 [published Online First: 2008/12/19]  
50  
51 44. McRae AD, Weijer C, Binik A, et al. When is informed consent required in cluster  
52 randomized trials in health research? *Trials* 2011;12:202. doi: 10.1186/1745-6215-12-  
53 202 [published Online First: 2011/09/13]  
54  
55 45. Giraudeau B, Caille A, Le Gouge A, et al. Participant informed consent in cluster  
56 randomized trials: review. *PloS one* 2012;7(7):e40436. doi:  
57 10.1371/journal.pone.0040436 [published Online First: 2012/07/14]  
58  
59 46. Sim J, Dawson A. Informed consent and cluster-randomized trials. *American journal of*  
60 *public health* 2012;102(3):480-5. doi: 10.2105/ajph.2011.300389 [published Online  
First: 2012/03/07]

## TABLES

Table 1. Intervention framework

| Component                                                                    | Frequency               | Tool                                                     | Goal                                              | Attendees                                                               |
|------------------------------------------------------------------------------|-------------------------|----------------------------------------------------------|---------------------------------------------------|-------------------------------------------------------------------------|
| Multidisciplinary rounds (DMR) by telemedicine                               | Daily (Monday – Friday) | Semi – structured patient electronic forms               | Establish a therapeutic plan for each ICU patient | Bedside clinicians, nurse and physiotherapists                          |
| Discussion of care performance indicators performed through virtual meetings | Monthly                 | Report with quality indicators (monthly temporal series) | Action Plan for suboptimal quality indicators     | Bedside clinicians, ICU head of department, quality improvement members |

**Table 2. Patient data collection schedule**

|                                          | Baseline period |       |           | After randomisation |       |           |
|------------------------------------------|-----------------|-------|-----------|---------------------|-------|-----------|
|                                          | Admission       | Daily | Discharge | Admission           | Daily | Discharge |
| Patient details                          | x               |       |           | x                   |       |           |
| Pre ICU events                           | x               |       |           | x                   |       |           |
| Type and cause of admission              | x               |       |           | x                   |       |           |
| Severity scores (SAPS 3 and SOFA)        | x               |       |           | x                   |       |           |
| Comorbidities / functional status        | x               |       |           | x                   |       |           |
|                                          |                 |       |           |                     |       |           |
| Treatment goals                          |                 | x     |           |                     | x     |           |
| Organ support and devices                | x               | x     |           | x                   | x     |           |
| Hospital-acquired infections             |                 | x     |           |                     | x     |           |
|                                          |                 |       |           |                     |       |           |
| Length of stay (ICU/Hospital)            |                 | x     | x         |                     | x     | x         |
| Mortality and destination (ICU/Hospital) |                 | x     | x         |                     | x     | x         |

ICU: intensive care unit; SAPS 3 score: simplified acute physiology score; SOFA score: sequential organ failure assessment score.



1  
2  
3 **FIGURES**  
4

5 **Figure 1. Geographic distribution of the 30 ICUs participating in the TELESCOPE trial**  
6

7  
8 **Figure 2. Trial timeline, randomisation, intervention and follow-up**

9 ICU: intensive care unit; IRB: institutional review board  
10

11  
12 **Figure 3. Illustration of the multicomponent training of board-certified intensivists to act in**  
13 **the intervention arm**

14 ICU: intensive care unit; IHI: Institute for Healthcare Improvement  
15  
16  
17  
18  
19  
20  
21  
22  
23  
24  
25  
26  
27  
28  
29  
30  
31  
32  
33  
34  
35  
36  
37  
38  
39  
40  
41  
42  
43  
44  
45  
46  
47  
48  
49  
50  
51  
52  
53  
54  
55  
56  
57  
58  
59  
60

For peer review only

1  
2  
3  
4  
5  
6  
7  
8  
9  
10  
11  
12  
13  
14  
15  
16  
17  
18  
19  
20  
21  
22  
23  
24  
25  
26  
27  
28  
29  
30  
31  
32  
33  
34  
35  
36  
37  
38  
39  
40  
41

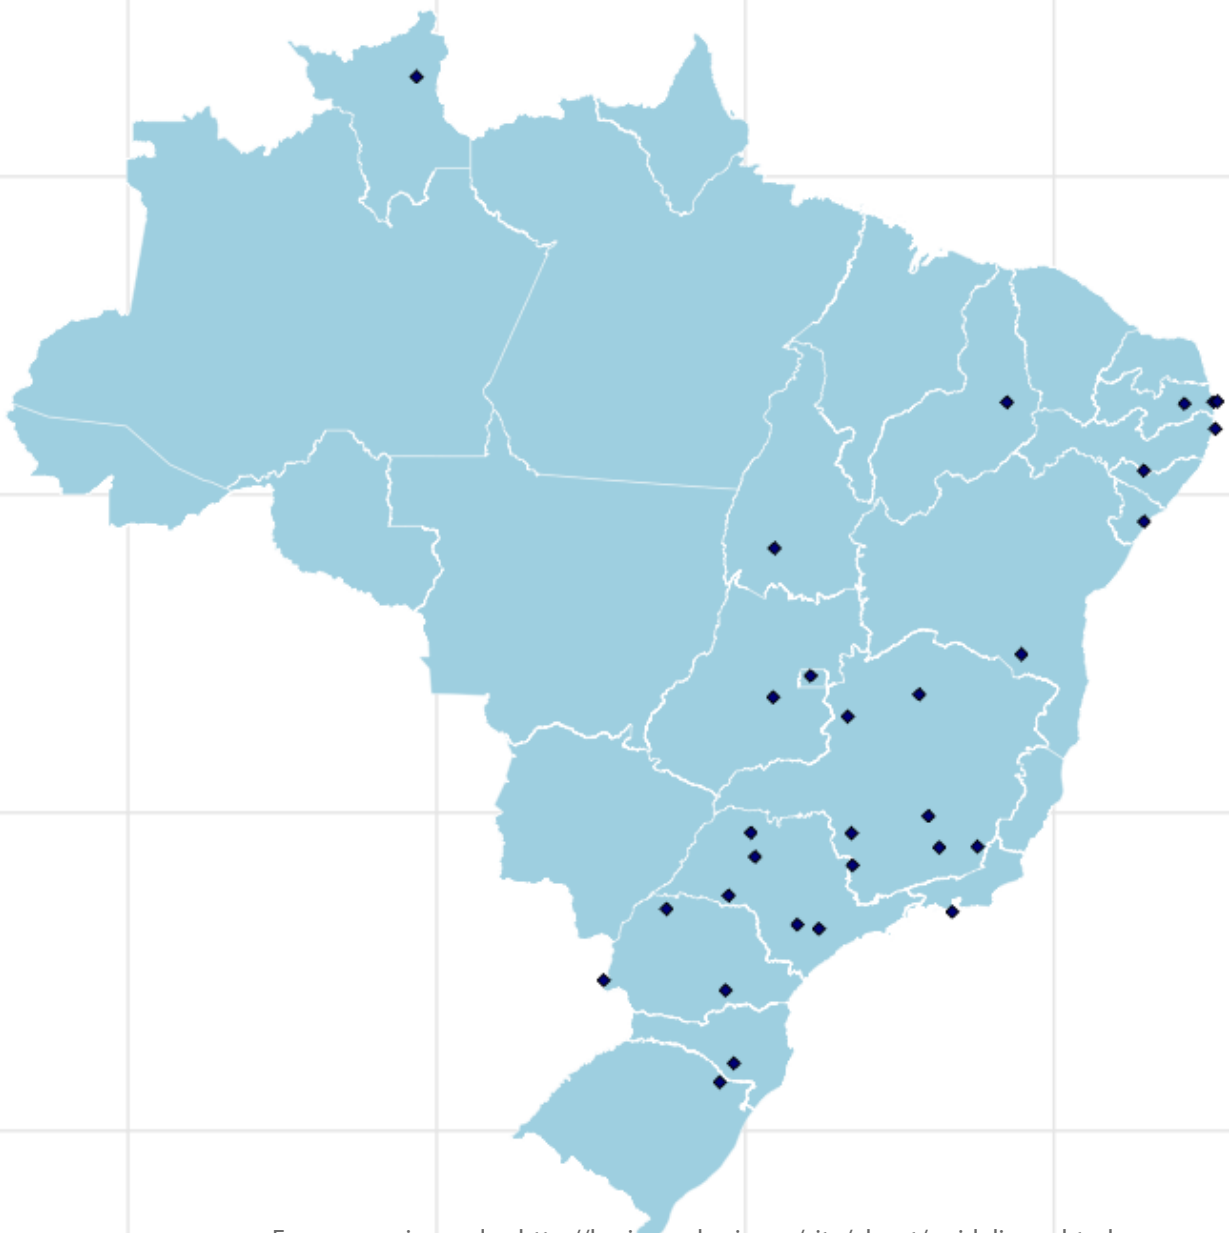

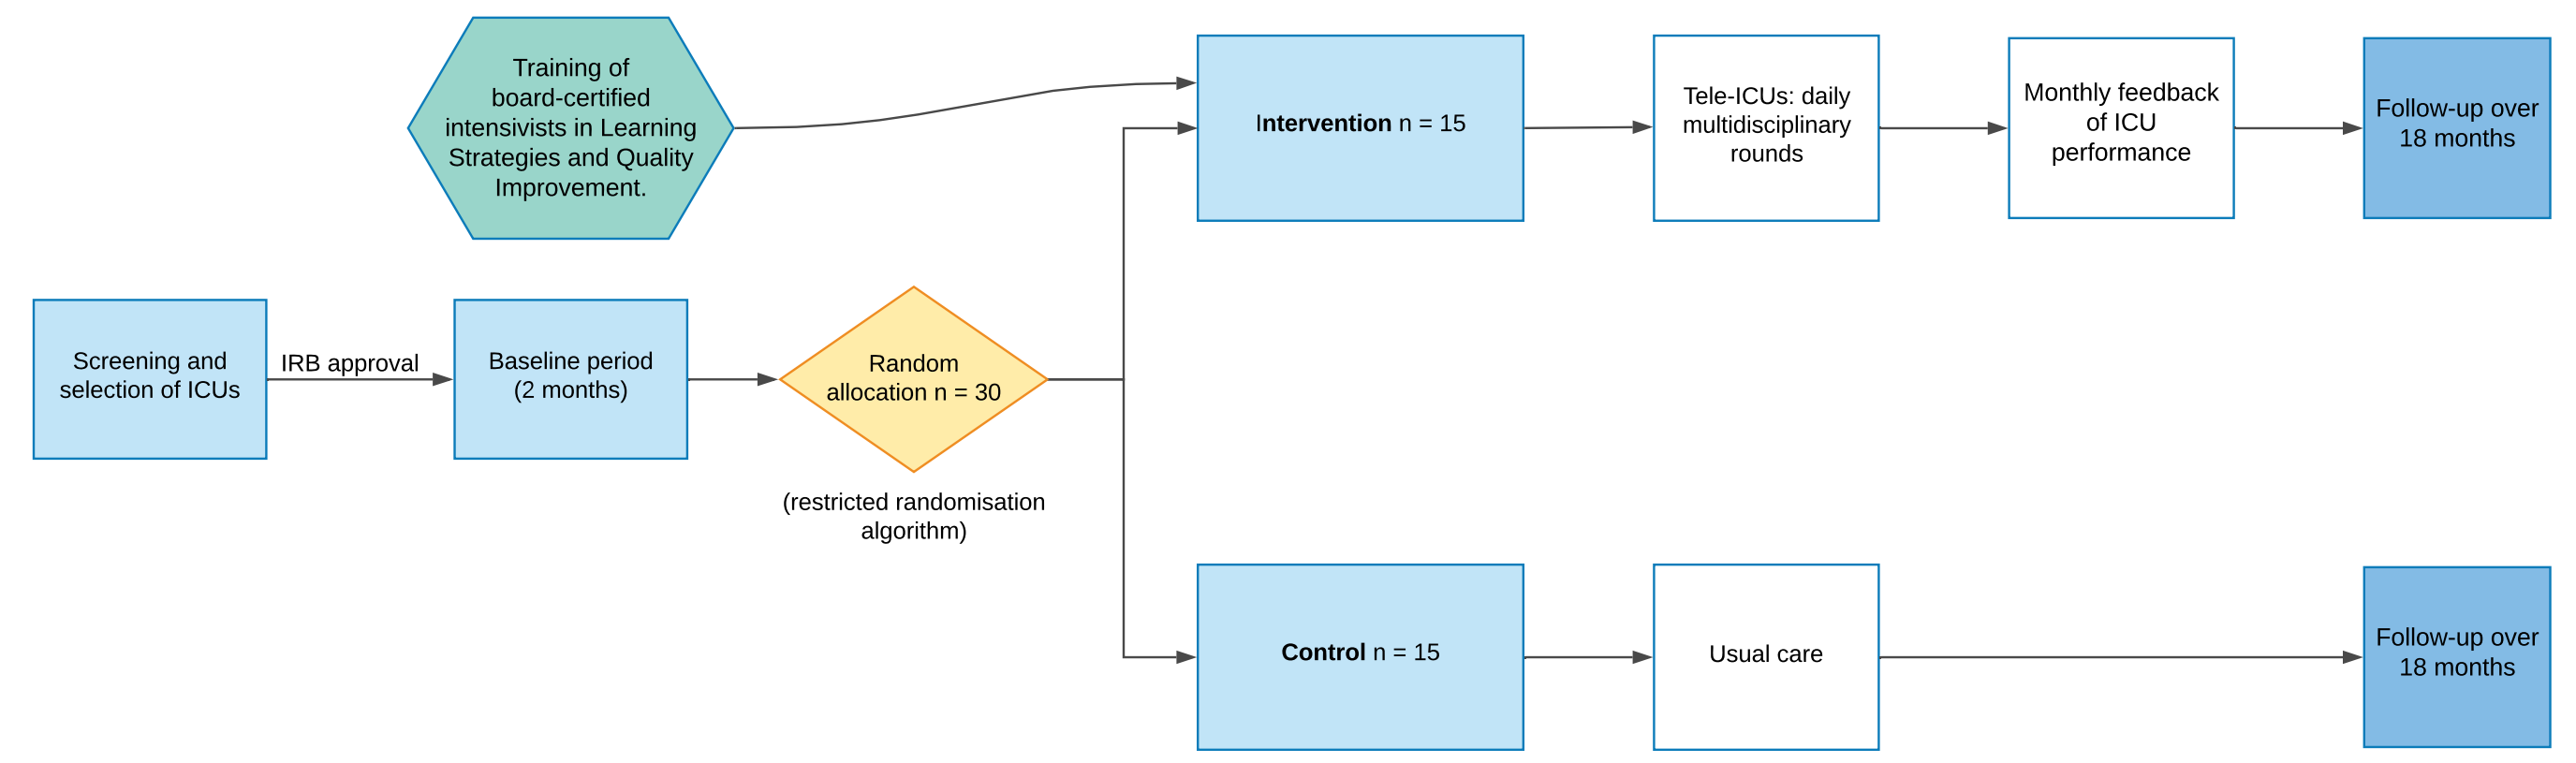

1  
2  
3  
4  
5  
6  
7  
8  
9  
10  
11  
12  
13  
14  
15  
16  
17  
18  
19  
20  
21  
22  
23  
24  
25  
26  
27  
28  
29  
30  
31  
32  
33  
34  
35  
36  
37  
38  
39  
40  
41  
42  
43  
44  
45  
46  
47  
48

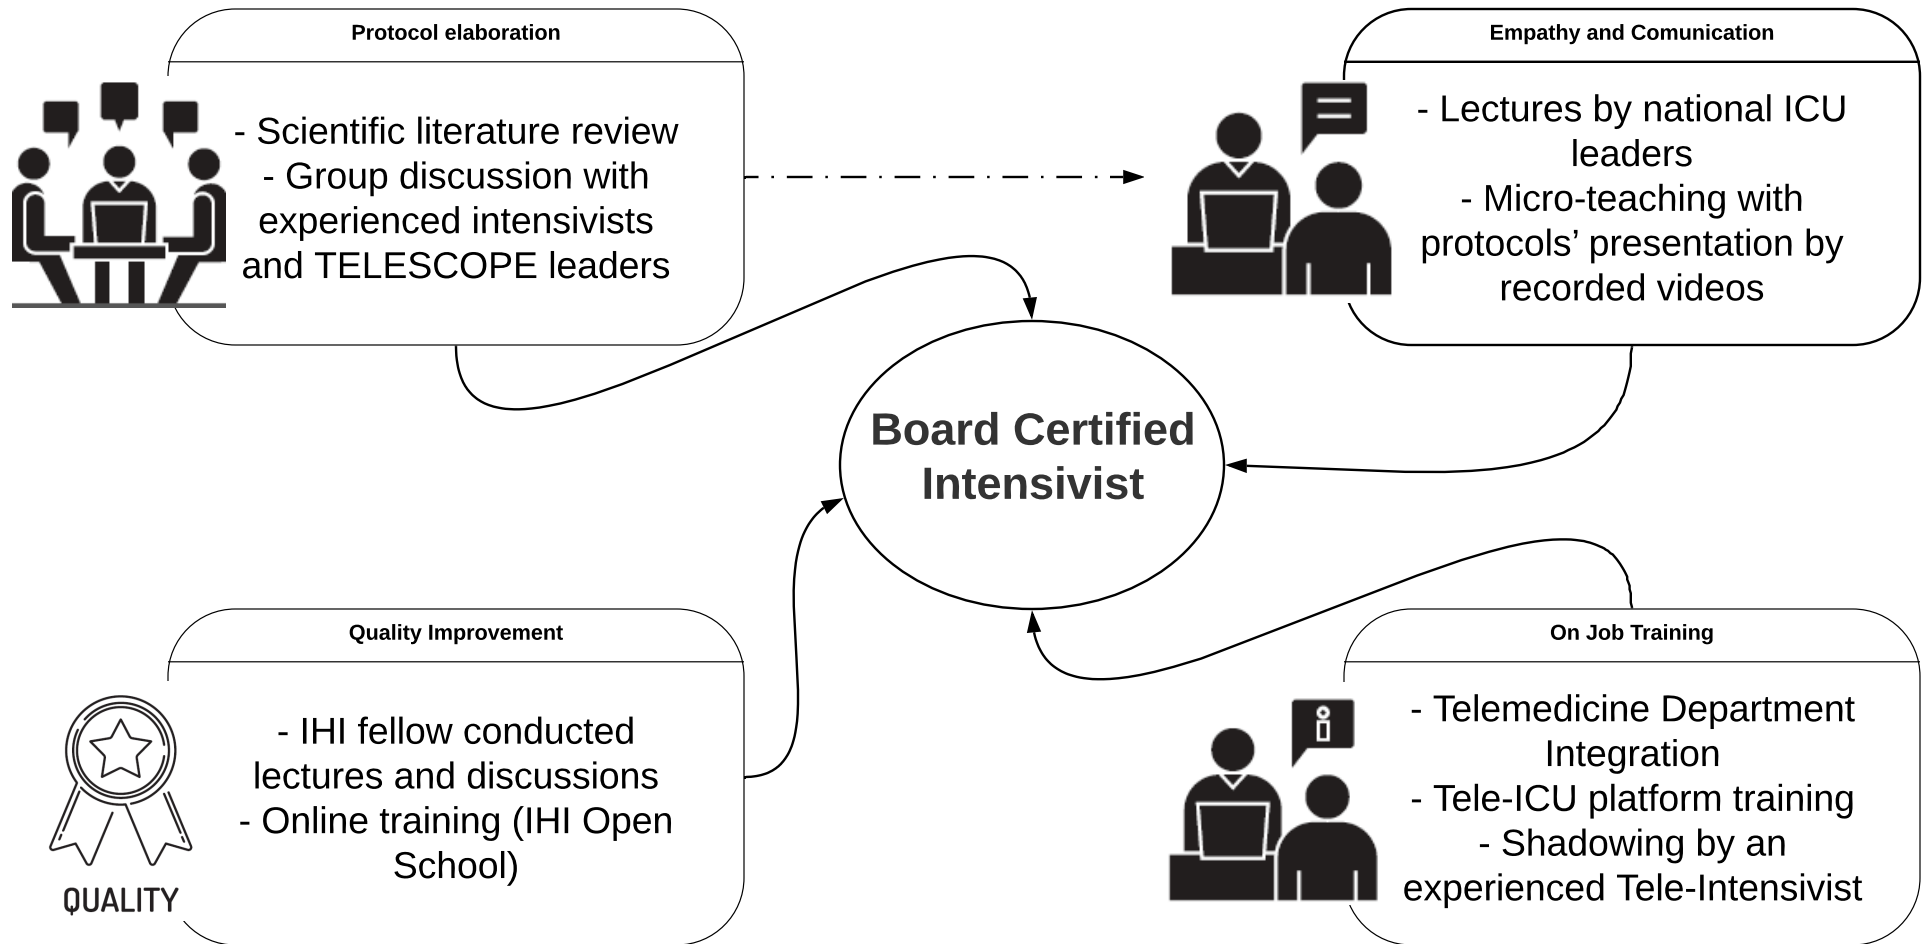

1  
2  
3  
4  
5  
6  
7  
8  
9  
10  
11  
12  
13  
14  
15  
16  
17  
18  
19  
20  
21  
22  
23  
24  
25  
26  
27  
28  
29  
30  
31  
32  
33  
34  
35  
36  
37  
38  
39  
40  
41  
42  
43  
44  
45  
46  
47

# BMJ Open

## TELE-critical care verSus usual Care On ICU Performance (TELESCOPE): protocol for a cluster-randomised clinical trial on adult general ICUs in Brazil

|                                 |                                                                                                                                                                                                                                                                                                                                                                                                                                                                                                                                                                                                                                                                                                                                                                                                                                                                                                                                                                                                                                                                                                                                                                                                                                                                                                                                                                                                                                                                                                                                                                                                                                 |
|---------------------------------|---------------------------------------------------------------------------------------------------------------------------------------------------------------------------------------------------------------------------------------------------------------------------------------------------------------------------------------------------------------------------------------------------------------------------------------------------------------------------------------------------------------------------------------------------------------------------------------------------------------------------------------------------------------------------------------------------------------------------------------------------------------------------------------------------------------------------------------------------------------------------------------------------------------------------------------------------------------------------------------------------------------------------------------------------------------------------------------------------------------------------------------------------------------------------------------------------------------------------------------------------------------------------------------------------------------------------------------------------------------------------------------------------------------------------------------------------------------------------------------------------------------------------------------------------------------------------------------------------------------------------------|
| Journal:                        | <i>BMJ Open</i>                                                                                                                                                                                                                                                                                                                                                                                                                                                                                                                                                                                                                                                                                                                                                                                                                                                                                                                                                                                                                                                                                                                                                                                                                                                                                                                                                                                                                                                                                                                                                                                                                 |
| Manuscript ID                   | bmjopen-2020-042302.R1                                                                                                                                                                                                                                                                                                                                                                                                                                                                                                                                                                                                                                                                                                                                                                                                                                                                                                                                                                                                                                                                                                                                                                                                                                                                                                                                                                                                                                                                                                                                                                                                          |
| Article Type:                   | Protocol                                                                                                                                                                                                                                                                                                                                                                                                                                                                                                                                                                                                                                                                                                                                                                                                                                                                                                                                                                                                                                                                                                                                                                                                                                                                                                                                                                                                                                                                                                                                                                                                                        |
| Date Submitted by the Author:   | 19-Jan-2021                                                                                                                                                                                                                                                                                                                                                                                                                                                                                                                                                                                                                                                                                                                                                                                                                                                                                                                                                                                                                                                                                                                                                                                                                                                                                                                                                                                                                                                                                                                                                                                                                     |
| Complete List of Authors:       | Noritomi, Danilo; Hospital Israelita Albert Einstein, Critical Care; Rede Impar, Práticas Clínicas<br>Ranzani, Otavio; Universidade de Sao Paulo Faculdade de Medicina Hospital das Clinicas, Pulmonary Division, Heart Institute, Hospital das Clinicas, University of Sao Paulo, Sao Paulo, Brazil; Barcelona Institute for Global Health, ISGlobal<br>Ferraz, Leonardo; Hospital Israelita Albert Einstein, Critical Care dos Santos, Maura<br>Cordioli, Eduardo; Hospital Israelita Albert Einstein, Critical Care Albaladejo, Renata; Hospital Israelita Albert Einstein, Critical Care Serpa Neto, Ary; Hospital Israelita Albert Einstein, Critical Care; BRICNET<br>Correa, Thiago; ICU, Hospital Israelita Albert Einstein, São Paulo, Brazil; BRICNET<br>Berwanger, Otávio; Hospital Israelita Albert Einstein de Morais, Lúbia; Hospital Israelita Albert Einstein, Critical Care Schettino, Guilherme; Hospital Israelita Albert Einstein, Critical Care Cavalcanti, Alexandre ; HCor Research Institute; BRICNET<br>Biondi, Rodrigo; Instituto de Cardiologia do Distrito Federal; Hospital Brasília<br>Rosa, Regis Goulart; H MV, Intensive Care; BRICNET<br>Salluh, Jorge; Department of Critical Care and Graduate Program in Translational Medicine, D'Or Institute for Research and Education, Rio de Janeiro, Brazil; BRICNET<br>Azevedo, Luciano Cesar; Hospital Sírio-Libanês, Intensive Care Unit; University of Sao Paulo, Emergency Medicine Department<br>Pereira, Adriano; Hospital Israelita Albert Einstein, Critical Care; Universidade Federal de Lavras, Postgraduate Program of Health Sciences |
| <b>Primary Subject Heading</b>: | Intensive care                                                                                                                                                                                                                                                                                                                                                                                                                                                                                                                                                                                                                                                                                                                                                                                                                                                                                                                                                                                                                                                                                                                                                                                                                                                                                                                                                                                                                                                                                                                                                                                                                  |
| Secondary Subject Heading:      | Health services research                                                                                                                                                                                                                                                                                                                                                                                                                                                                                                                                                                                                                                                                                                                                                                                                                                                                                                                                                                                                                                                                                                                                                                                                                                                                                                                                                                                                                                                                                                                                                                                                        |
| Keywords:                       | Telemedicine < BIOTECHNOLOGY & BIOINFORMATICS, Quality in health care < HEALTH SERVICES ADMINISTRATION & MANAGEMENT, INTENSIVE & CRITICAL CARE                                                                                                                                                                                                                                                                                                                                                                                                                                                                                                                                                                                                                                                                                                                                                                                                                                                                                                                                                                                                                                                                                                                                                                                                                                                                                                                                                                                                                                                                                  |

1  
2  
3  
4  
5  
6  
7  
8  
9  
10  
11  
12  
13  
14  
15  
16  
17  
18  
19  
20  
21  
22  
23  
24  
25  
26  
27  
28  
29  
30  
31  
32  
33  
34  
35  
36  
37  
38  
39  
40  
41  
42  
43  
44  
45  
46  
47  
48  
49  
50  
51  
52  
53  
54  
55  
56  
57  
58  
59  
60

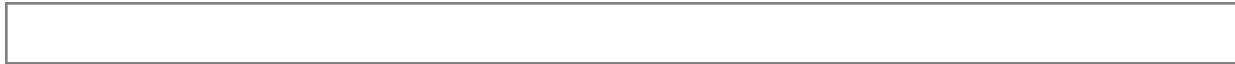

SCHOLARONE™  
Manuscripts



I, the Submitting Author has the right to grant and does grant on behalf of all authors of the Work (as defined in the below author licence), an exclusive licence and/or a non-exclusive licence for contributions from authors who are: i) UK Crown employees; ii) where BMJ has agreed a CC-BY licence shall apply, and/or iii) in accordance with the terms applicable for US Federal Government officers or employees acting as part of their official duties; on a worldwide, perpetual, irrevocable, royalty-free basis to BMJ Publishing Group Ltd ("BMJ") its licensees and where the relevant Journal is co-owned by BMJ to the co-owners of the Journal, to publish the Work in this journal and any other BMJ products and to exploit all rights, as set out in our [licence](#).

The Submitting Author accepts and understands that any supply made under these terms is made by BMJ to the Submitting Author unless you are acting as an employee on behalf of your employer or a postgraduate student of an affiliated institution which is paying any applicable article publishing charge ("APC") for Open Access articles. Where the Submitting Author wishes to make the Work available on an Open Access basis (and intends to pay the relevant APC), the terms of reuse of such Open Access shall be governed by a Creative Commons licence – details of these licences and which [Creative Commons](#) licence will apply to this Work are set out in our licence referred to above.

Other than as permitted in any relevant BMJ Author's Self Archiving Policies, I confirm this Work has not been accepted for publication elsewhere, is not being considered for publication elsewhere and does not duplicate material already published. I confirm all authors consent to publication of this Work and authorise the granting of this licence.

## TITLE PAGE:

**TELE-critical care verSus usual Care On ICU PErformance (TELESCOPE): protocol for a cluster-randomised clinical trial on adult general ICUs in Brazil**

Danilo Teixeira Noritomi<sup>1,2,3\*</sup>; Otavio T. Ranzani<sup>4,5\*</sup>; Leonardo Jose Rolim Ferraz<sup>1</sup>; Maura Cristina dos Santos<sup>1</sup>; Eduardo Cordioli<sup>1</sup>, Renata Albaladejo<sup>1</sup>; Ary Serpa Neto<sup>1,6</sup>; Thiago Domingos Corrêa<sup>1,6</sup>; Otávio Berwanger<sup>1</sup>, Lúbia Caus de Moraes<sup>1</sup>; Guilherme Schettino<sup>1</sup>, Alexandre Biasi Cavalcanti<sup>6,7</sup>, Regis Goulart Rosa<sup>6,9</sup>, Rodrigo Santos Biondi<sup>8</sup>, Jorge Salluh<sup>6,10</sup>, Luciano Azevedo<sup>6,11,12</sup>, Adriano José Pereira<sup>1,2,13,14</sup>, On behalf of the TELESCOPE Trial Investigators

1. Tele-ICU Department, Hospital Israelita Albert Einstein, São Paulo, SP, Brazil.
2. Department of Critical Care Medicine, Hospital Israelita Albert Einstein, São Paulo, SP, Brazil
3. Quality and Patient Safety Department, Rede Ímpar, São Paulo, SP, Brazil
4. Pulmonary Division, Heart Institute (InCor), Hospital das Clinicas HCFMUSP, Faculdade de Medicina, Universidade de Sao Paulo, São Paulo, Brazil.
5. Barcelona Institute for Global Health, ISGlobal, Barcelona, Spain
6. Brazilian Research in Intensive Care Network (BRICNet)
7. HCor Research Institute, São Paulo, Brazil.
8. Instituto de Cardiologia do Distrito Federal e Hospital Brasília, Rede Ímpar, Brasília (DF), Brasil.
9. Critical Care Department, Hospital Moinhos de Vento, Porto Alegre, RS, Brazil
10. D'or Institute for Research and Education, Rio De Janeiro, Brazil.
11. University of Sao Paulo, Emergency Medicine Department, Sao Paulo, Sao Paulo, Brazil.
12. Hospital Sirio-Libanês, Instituto Sirio-Libanês de Ensino e Pesquisa, Sao Paulo, Sao Paulo, Brazil.
13. Hospital Municipal da Vila Santa Catarina, São Paulo, SP, Brazil.
14. Postgraduate Program of Health Sciences, Universidade Federal de Lavras/MG – Brazil.

\* DTN and OTR contributed equally to this paper.

**Research registry:** NCT03920501

**Version:** 3.0 – December 2020

**Funding:** PROADI – Institutional Development Program of the Unified Health System (n° 25000.018804/2018-23). Secretaria de Ciência, Tecnologia, Inovação e Insumos Estratégicos. Brazilian Ministry of Health. [diego.diniz@saude.gov.br](mailto:diego.diniz@saude.gov.br).

**Contributors:** DTN, OTR and AJP developed the main study intervention. DTN, OTR and AJP developed the original concept of this study. DTN, OTR, MS, ASN, TDC, RA, LC, ABC, RB, RGR, JS, LA, GS, OB, EC, LRF and AJP contributed to study design. DTN, OTR, MS, ASN and AJP wrote the first draft of the paper, and TDC, RA, LC, ABC, RB, RGR, JS, LA, GS, OB, EC and LRF revised the first draft. The final manuscript was reviewed by all the authors. All authors read and approved the final manuscript.



1  
2  
3 **Corresponding author:** Danilo Teixeira Noritomi  
4

5 Intensive Care Unit, Hospital Israelita Albert Einstein, São Paulo, SP.  
6

7 **E-mail:** dnoritomi@hotmail.com  
8  
9

10 **Word count:** 4239/ 4000  
11  
12  
13  
14  
15  
16  
17  
18  
19  
20  
21  
22  
23  
24  
25  
26  
27  
28  
29  
30  
31  
32  
33  
34  
35  
36  
37  
38  
39  
40  
41  
42  
43  
44  
45  
46  
47  
48  
49  
50  
51  
52  
53  
54  
55  
56  
57  
58  
59  
60

For peer review only

**SYNOPSIS (WHO Trial Registration Data Set)**

| <b>Data category</b>                       | <b>Information</b>                                                                                                                                                                                    |
|--------------------------------------------|-------------------------------------------------------------------------------------------------------------------------------------------------------------------------------------------------------|
| Primary register and identification number | <a href="https://clinicaltrials.gov">ClinicalTrials.gov</a> - NCT03920501                                                                                                                             |
| Date of first registration                 | April 19, 2019                                                                                                                                                                                        |
| Secondary identification numbers           | PROADI 25000.018804/2018-23                                                                                                                                                                           |
| Development agency / funding source        | Ministry of Health (Institutional Development Program of the Unified Health System – PROADI SUS)                                                                                                      |
| Primary sponsor                            | Ministry of Health                                                                                                                                                                                    |
| Secondary sponsor                          | Hospital Israelita Albert Einstein                                                                                                                                                                    |
| General contact                            | <i>DN</i> , MD, PhD. Phone: (+55) 11 96490-7494, e-mail: danilo.noritomi@einstein.br                                                                                                                  |
| Academic contact                           | <i>DN</i> , MD, PhD. Phone: (+55) 11 96490-7494, e-mail: danilo.noritomi@einstein.br                                                                                                                  |
| Public title                               | The influence of Telemedicine in the treatment of Intensive Care Unit (ICU) patients.                                                                                                                 |
| Academic title                             | Multicentric, controlled, cluster randomized superiority study to evaluate the effectiveness of specialist assistance via Telemedicine in patients admitted to ICUs in Brazilian hospitals.           |
| Countries involved in recruitment          | Brazil                                                                                                                                                                                                |
| Health conditions/ problems studied        | ICU care design, critically ill patients, Telemedicine.                                                                                                                                               |
| Interventions                              | Comparator: use of Telemedicine (intensivists) in daily ICU multidisciplinary rounds and quality indicators management (audit and feedback)<br>Control: ICUs in the same strata, with no intervention |

| Data category                         | Information                                                                                                                                                                                                                                                                                                                                                                                                                                                                                                                                                                                                                                              |
|---------------------------------------|----------------------------------------------------------------------------------------------------------------------------------------------------------------------------------------------------------------------------------------------------------------------------------------------------------------------------------------------------------------------------------------------------------------------------------------------------------------------------------------------------------------------------------------------------------------------------------------------------------------------------------------------------------|
| Main inclusion and exclusion criteria | <p>ICU clusters (all adult patients admitted after the beginning of the study will be included, with the exception of those admitted for non-medical reasons)</p> <p>Age: <math>\geq 18</math> years old</p> <p>Sex: Both</p> <p>Accepts volunteers: No</p> <p>Inclusion criteria for units: Public Hospital ICUs with a minimum of 8 hospital beds interested and committed to participating in the study.</p> <p>Exclusion criteria for units: Units with fully established daily multidisciplinary rounds by an intensivist, specialized units (such as ICUs admitting exclusively cardiac surgical or neurological patients) or step-down units.</p> |
| Type of study                         | <p>Intervention / cluster</p> <p>Allocation: randomization stratified by patients' previous ICU length of stay</p> <p>Intervention design: parallel assignment</p> <p>Masking: Open</p> <p>Primary purpose: Quality improvement</p>                                                                                                                                                                                                                                                                                                                                                                                                                      |
| Expected date of first inclusion      | February 2019                                                                                                                                                                                                                                                                                                                                                                                                                                                                                                                                                                                                                                            |
| Sample size                           | 30 clusters (15 in each group), approximately 15.000 patients                                                                                                                                                                                                                                                                                                                                                                                                                                                                                                                                                                                            |
| Recruitment status                    | Not initiated (expected for 2019)                                                                                                                                                                                                                                                                                                                                                                                                                                                                                                                                                                                                                        |
| Primary outcome                       | Length of stay in the ICU (days)                                                                                                                                                                                                                                                                                                                                                                                                                                                                                                                                                                                                                         |

| Data category      | Information                                                                                                                                                                                                                                                                                                                                                                                                                                                                                                                                                                                                                                                                                                                                                                                                                                                                   |
|--------------------|-------------------------------------------------------------------------------------------------------------------------------------------------------------------------------------------------------------------------------------------------------------------------------------------------------------------------------------------------------------------------------------------------------------------------------------------------------------------------------------------------------------------------------------------------------------------------------------------------------------------------------------------------------------------------------------------------------------------------------------------------------------------------------------------------------------------------------------------------------------------------------|
| Secondary outcomes | <ul style="list-style-type: none"> <li>• Classification based on the association between standardized mortality ratio (SMR) and standardized resource use (SRU)</li> <li>• Rate per patient per day receiving oral or enteral nutrition</li> <li>• Rate per patient per day in appropriate sedation (RASS = -3 to +1)</li> <li>• Rate of normoxic patients on oxygen therapy (92% <math>\geq</math>SpO<sub>2</sub><math>\geq</math>96%)</li> <li>• Time without mechanical ventilation (MV) in 28 days</li> <li>• Duration of CVC use</li> <li>• Duration of vesical delayed probe (VDP) use</li> <li>• Incidence of central line-associated bloodstream infection (CLABSI) (43)</li> <li>• Incidence of ventilator-associated pneumonia (VAP) (44)</li> <li>• Incidence of catheter-associated urinary tract infection (CAUTI) (45)</li> <li>• Hospital Mortality</li> </ul> |

1  
2  
3  
4  
5  
6  
7  
8  
9  
10  
11  
12  
13  
14  
15  
16  
17  
18  
19  
20  
21  
22  
23  
24  
25  
26  
27  
28  
29  
30  
31  
32  
33  
34  
35  
36  
37  
38  
39  
40  
41  
42  
43  
44  
45  
46  
47  
48  
49  
50  
51  
52  
53  
54  
55  
56  
57  
58  
59  
60

For peer review only

**PROJECT VERSION CONTROL**

| Date               | Comments                                 |
|--------------------|------------------------------------------|
| September 25, 2018 | Original version (version 1.0)           |
| October 09, 2020   | Updated risks and benefits (version 2.0) |
| December 31, 2020  | Enrolment period extension (version 3.0) |

For peer review only

1  
2  
3  
4  
5  
6  
7  
8  
9  
10  
11  
12  
13  
14  
15  
16  
17  
18  
19  
20  
21  
22  
23  
24  
25  
26  
27  
28  
29  
30  
31  
32  
33  
34  
35  
36  
37  
38  
39  
40  
41  
42  
43  
44  
45  
46  
47  
48  
49  
50  
51  
52  
53  
54  
55  
56  
57  
58  
59  
60

For peer review only

## FUNDING/SPONSOR

The Ministry of Health (Institutional Development Program of the Unified Health System – PROADI SUS) was the primary source of funding, including costs of physician services, purchase of equipment (hardware) for Telemedicine sessions, hiring of local professionals for data collection, and travel expenses for training and monitoring. The same funding also covered costs related to the regulatory part of the study – data collection, monitoring, data curation and statistical support. The Hospital Israelita Albert Einstein allocated time of professionals and specialists who sat on the Trial Management Committee (TMC) of the study, as well as assign its Telemedicine service system. The sponsor had no role regarding design; collection, management, analysis, and interpretation of data; writing of the report; and the decision to submit the report for publication.



## COMPOSITION, ROLES AND RESPONSIBILITIES

**Coordinating Center:** Hospital Israelita Albert Einstein (HIAE)

**Executive Committee** (Design and execution of the study, protocol preparation and revisions, preparation of the investigator's brochure (IB) and case reform forms (CRF), organization of the meetings of the committee of representatives of the ICUs participating in the study, oversight of the clinical trials office (ARO) management activities, publishing of study reports):

- Adriano José Pereira – intensivist. Intensive Care Unit, Hospital Israelita Albert Einstein  
- **Principal Investigator/Study Chair.**
- Danilo Teixeira Noritomi - intensivist. Hospital Israelita Albert Einstein, São Paulo, SP.  
**Senior Investigator.**
- Otavio Tavares Ranzani – intensivist and epidemiologist
- Maura Santos - Senior Nurse

**Steering Committee:**

- Adriano José Pereira – intensivist. Intensive Care Unit, Hospital Israelita Albert Einstein  
- **Principal Investigator/Study Chair.**
- Alexandre Biasi Cavalcanti – intensivist. Research Institute HCor, São Paulo, SP.  
Member of BRICNet – Brazilian Research in Intensive Care Network
- Ary Serpa Neto – intensivist. Hospital Alemão Oswaldo Cruz, São Paulo, SP. Member  
of BRICNet – Brazilian Research in Intensive Care Network
- Danilo Teixeira Noritomi - intensivist. Hospital Israelita Albert Einstein, São Paulo, SP.  
**Senior Investigator.**
- Eduardo Cordioli. Health Care Manager of the Department of Telemedicine of the  
Hospital Israelita Albert Einstein, São Paulo, SP
- Fernando Gatti. Coordinator of the Hospital Infection Control Service of the Hospital  
Israelita Albert Einstein, São Paulo, SP – 10
- Jorge Salluh. Intensivist. Professor in the UFRJ Graduate Program, Researcher of the  
Intensive Care Department, IDOR- Rio de Janeiro

- 1
- 2
- 3 – Leonardo José Rolin Ferraz – intensivist. Intensive Care Unit, Hospital Israelita Albert
- 4 Einstein
- 5
- 6
- 7
- 8 – Lúbia Caus. Intensivist. Intensive Care Unit, Hospital Israelita Albert Einstein.
- 9
- 10
- 11 – Luciano Azevedo – intensivist. Hospital Sírio-Libanês & Hospital São Paulo, UNIFESP,
- 12 São Paulo, SP. Member of BRICNet – Brazilian Research in Intensive Care Network
- 13
- 14
- 15 – Maura Cristina Santos. Senior nurse of the Department of Severely ill Patients, tele –
- 16 ICU. Study Manager
- 17
- 18
- 19 – Otávio Berwanger – epidemiologist. Hospital Israelita Albert Einstein, São Paulo, SP
- 20
- 21
- 22 – Otavio Tavares Ranzani – intensivist and epidemiologist
- 23
- 24
- 25 – Regis Goulart Rosa – intensivist. Adult Intensive Care Unit of the Hospital Moinhos de
- 26 Vento, Porto Alegre, RS
- 27
- 28
- 29 – Renata Albaladejo. Nurse specialist in Telemedicine
- 30
- 31
- 32 – Rodrigo Biondi – intensive care physician
- 33
- 34
- 35 – Thiago Domingos Correa – intensivist. Hospital Israelita Albert Einstein, São Paulo, SP.
- 36 Member of BRICNet – Brazilian Research in Intensive Care Network
- 37
- 38

### ***Project Office***

- 39
- 40
- 41 – Composed by Main Researcher, Senior Researcher and Study Manager
- 42
- 43
- 44 – Responsible for the trial planning
- 45
- 46
- 47 – Responsible for organizing meetings with the representative committee of the ICUs
- 48 participating in the trial
- 49
- 50
- 51 – Responsible for producing semiannual progress reports for the Ministry of Health and
- 52 the Ethics Committee
- 53
- 54
- 55 – Responsible for the trial master file
- 56
- 57
- 58 – Responsible for managing the trial financial resources (in partnership with the PROADI
- 59 institutional office) and contractual issues with third parties and individual centers
- 60

- Responsible for making recommendations for local investigators
- Responsible for semi-annual monitoring (in partnership with ARO), providing feedbacks and decisions on visits to the centers
- Responsible for data checking
- Responsible for randomization

#### ***Representative Committee of ICUs participating in the trial***

- Ensure implementation of interventions at the center
- Ensure data collection quality
- Monitor trial and, if necessary, approve protocol changes or amendments/IB, ensuring the trial is conducted as efficiently as possible.

#### ***Local Investigators***

- A local investigator will be appointed in each center (ICU coordinator or senior doctor at the ICU). He will oversee hired data collectors. In intervention on the ICUs, they will be responsible for ensuring the implementation of intervention proposed by a remote intensivist (Telemedicine), data collection / feeding, filling in the CRF (Case Report Form) and patient follow-up.

#### ***Data manager***

- Responsible (together with Einstein's technical Telemedicine team) for maintaining patient care system, data feeding and verification.
- Responsible to execute the Data Monitoring Plan.

#### ***Sponsor (Brazil Ministry of Health)***

- Approval of detailed study proposal, according to public interest
- Project schedule development follow-up (quarterly face-to-face or virtual meetings; annual written report)
- Pre-publication consent (according to current legislation)
- No participation or interference in the analyses and results.

**ABSTRACT** (word count: 297/300)

**Introduction** – Daily multidisciplinary rounds (DMRs) consists of systematic patient-centred discussions aiming to establish joint therapeutic goals for the next 24 hours of ICU care. The aim of the present study protocol is to evaluate whether an intervention consisting of guided DMRs, supported by a remote specialist and audit / feedback on care performance will reduce ICU length of stay compared to a control group.

**Methods and analysis** - A multicentre, controlled, cluster-randomised superiority trial including 30 ICUs in Brazil (15 intervention and 15 control), from August 2019 to December 2020. In a parallel assignment, ICUs are randomised to a complex-intervention composed by daily rounds carried out through Tele-ICU by a remote ICU physician; development of local quality indicators dashboards coupled with monthly meetings with local leadership; and dissemination of evidence-based clinical protocols *versus* usual care. Primary outcome is ICU length of stay. Secondary outcomes include classification of the unit according to the profiles defined by the standardized resource use and the standardized mortality rate, hospital mortality, incidence of healthcare-associated infections, ventilator-free days at 28 days, patient-days receiving oral or enteral feeding, patient-days under light sedation or alert and calm, rate of patients under normoxaemia. All adult patients admitted after the beginning of the study in each participant ICU will be enrolled. Inclusion criteria (clusters): public Brazilian ICUs with a minimum of 8 ICU beds interested/committed to participating in the study. Exclusion criteria (clusters): units with fully established daily multidisciplinary rounds by an intensivist, specialized or step-down units.

**Ethics and dissemination** - The study protocol was approved by the IRB of the coordinator centre, and by IRBs of each enrolled hospital/ICU. Statistical Analysis Protocol is being prepared for submission before the end of patient's enrolment. Results will be disseminated through conferences, peer-reviewed journals and to each participating unit.

**Keywords:** Telemedicine, Tele-ICU, Quality Improvement, Intensive Care.

**ARTICLE SUMMARY:**

**Strengths and limitations of this study** (Up to five short bullet points, no longer than one sentence each, that relate specifically to the methods)

- TELESCOPE is the first, large, multicentre cluster randomised trial performed in a middle-income country evaluating if a complex-intervention delivered mainly by TELE-ICU physician and aiming to optimize the care of critically ill patients impacts clinical outcomes.
- TELESCOPE trained general board-certified ICU physicians to deliver TELE-ICU consultancy and provide performance feedback to the attending team and managers.
- TELESCOPE used a baseline period as reference for randomisation, by using a minimization algorithm in order to achieve balance between arms and decrease within cluster variability.
- TELESCOPE intervention occurs only inside the ICU and an expected limitation is that length-of-stay depends on factors outside the ICU, such as ward bed availability.

## INTRODUCTION

Healthcare demand for critically ill patients admitted to Intensive Care Units (ICUs) has been expanding worldwide, causing great social impact.<sup>1-3</sup> Several factors have contributed to it, such as population ageing,<sup>4</sup> a higher prevalence of chronic diseases, among others.<sup>3 5</sup> Brazil is especially sensitive to this issue as it experiences great regional disparities and population ageing without adequate control of the main health determinants.<sup>6-9</sup> Such situation has resulted in a large number of frail elderly, who often require critical care due to acute aggravations in chronic conditions.<sup>10-12</sup> This scenario combined with the risk of spending a significant amount of money with suboptimal return for the society, justifies seeking efficient care for severely ill patients.<sup>13</sup>

Daily multidisciplinary round (DMR) is an approach that optimizes the ICU care<sup>14-16</sup> DMRs consists of systematic patient-centred discussions aiming to establish joint therapeutic goals for the next 24 hours of ICU care.<sup>14</sup> In different studies, DMR has been associated to better clinical outcomes.<sup>15 16</sup> However, full implementation of DMR is still challenging, since DMR must contain several attributes in order to maximize its results: its multidisciplinary character; proper settings; time and team standardizations; definition of roles; use of guiding tools; reduction of interruptions and focus on documented objectives.<sup>14</sup>

Telecommunication use for health care practice, the prototype for what telemedicine has become, has been described since the advent of telecommunication.<sup>17</sup> The availability of high-speed data traffic has expanded the boundaries of Telemedicine, allowing the emergence of the first trial with critically ill patients in 1977.<sup>18</sup> In recent years, the use of Telemedicine in critically ill patients, known as tele-ICU, has gained relevance.<sup>19</sup> Specifically in the US, the number of ICU beds with some form of Telemedicine coverage has reached at

1  
2  
3 least 15%.<sup>20 21</sup> There is a variety of possible tele-ICU applications, such as second opinion  
4  
5 consultations in specific cases, monitoring of vital signs, real-time performance and DMR  
6  
7 conducted by a remotely located medical specialist.<sup>22 23</sup> . However, the benefit of tele-ICU  
8  
9 lacks high quality scientific evidence, particularly outside high-income countries.<sup>24 25</sup>  
10  
11 Furthermore, most of the studies published so far address Telemedicine in ICUs using vital  
12  
13 signs monitoring and a continuous response system in a costly way.<sup>26</sup> Thus, little is known  
14  
15 about the use of Telemedicine focused primarily on supporting DMR, which is understood to  
16  
17 be both effective and more feasible from the economic perspective.  
18  
19  
20  
21  
22  
23  
24  
25

## 26 **METHODS AND ANALYSIS**

### 27 ***Aim and objectives***

28  
29 The TELESCOPE trial aims to answer to the following research question: Does a complex  
30  
31 intervention offered by tele-ICU, focused on DMR attended by remote intensivists, improve  
32  
33 ICU efficiency of adult general units in Brazil?  
34  
35  
36  
37  
38  
39

#### 40 *Primary Goal*

- 41  
42  
43 - To evaluate whether an intervention consisting of guided DMRs, supported by a  
44  
45 remote specialist (intensivist) through Telemedicine and audit / feedback on care  
46  
47 performance will reduce ICU length of stay compared to a control group.  
48

#### 49 *Secondary goals*

- 50  
51  
52 - To evaluate whether an intervention consisting of guided DMRs, supported by a  
53  
54 remote specialist (intensivist) through Telemedicine and audit / feedback on care  
55  
56 performance improves indicators of ICU performance compared to a control group.  
57  
58  
59  
60

### ***Study design and setting***

1  
2  
3 The TELESCOPE trial is a national, multi-centre, controlled, open label, cluster  
4 randomised trial. The study tests the effectiveness of daily multidisciplinary rounds  
5 conducted by an intensivist through Telemedicine in Brazilian ICUs. Approximately 15,000  
6 patients are expected to be recruited for a period of 18 months in 30 Brazilian ICUs (Figure  
7  
8  
9  
10  
11  
12  
13 1).

14  
15 After a 2-month observation period (baseline period) in which performance indicators  
16 for eligible ICUs is collected without any intervention (with the purpose of obtaining data for  
17 randomisation and characterization of the initial ICU status), the ICUs eligible for the study  
18 are randomised to either receive DMRs conducted by an intensivist through Telemedicine,  
19 from Monday to Friday, in addition to a monthly discussion of care performance indicators  
20 performed through virtual meetings (Intervention Group), or receive the unit's usual care  
21 (Control Group) (Figure 2). ICU board certified physicians receives a multicomponent training  
22 before starting the tele-ICU DMR, comprising empathy and communication and quality  
23 improvement (Figure 3). The study protocol was registered in the Clinicaltrials.Gov  
24 (NCT03920501). The study protocol follows the recommendations of the SPIRIT 2013  
25 Statement (supplementary file 1).<sup>27</sup>

## 45 **Intervention**

### 47 *Intervention group (Tele-ICU) (Table 1)*

49 Trial intervention consists of:

- 51  
52 1. *Daily multidisciplinary rounds (DMR) led by remote intensivists* - Discussions are  
53 conducted by an intensivist located in a remote centre (tele-intensivist) and the local  
54 multidisciplinary team (doctor, nurse and physiotherapist). DMRs takes place from  
55 Monday to Friday, in predetermined hours (mostly during the mornings), using  
56  
57  
58  
59  
60



1  
2  
3 Telemedicine equipment, and approach every patient admitted to the participating  
4  
5 ICUs. The main objective of DMR conducted by a tele-intensivist is to discuss  
6  
7 diagnostic hypotheses, active problems and create a treatment plan until the next  
8  
9 DMR. Tele-intensivists make recommendations based on updated scientific evidence,  
10  
11 suitable to the local context. Clinical protocols in texts and videos formats (developed  
12  
13 and used during the tele-intensivists training period) were made available to  
14  
15 physicians and multidisciplinary team of the ICUs in the intervention arm, right after  
16  
17 randomisation and establishment of a DMR routine. Electronic forms for patient  
18  
19 follow-up serves as a guideline (Index) and are filled out by tele-intensivists. According  
20  
21 to the current regulation (national resolution from the Brazilian Federal Council of  
22  
23 Medicine, CFM Resolution 1643 of 2002), tele-intensivists does not act directly upon  
24  
25 patients, but are rather mediated by the local team. Therefore, the local healthcare  
26  
27 practitioners implement the treatment plan. Indicators of adherence to  
28  
29 recommendations made by tele-intensivists are registered. Tele-intensivists do not  
30  
31 write medical prescriptions, nor gives direct orders to the local care team for  
32  
33 procedures or interventions. DMRs may be postponed, interrupted or suspended in  
34  
35 case of urgency / medical emergency situations that may hinder participation of local  
36  
37 doctors.  
38  
39  
40  
41  
42  
43  
44  
45  
46  
47  
48  
49

- 50 2. *Management of ICU performance* - The variables collected for the trial (table 1) are  
51  
52 presented aggregately in reports available for each coordinator of the participating  
53  
54 ICUs as well as for tele-intensivists. Data from Case Report Forms - CRFs (REDCap®,  
55  
56 Vanderbilt University Medical Center, TN, USA) are used to automatically feed  
57  
58 dashboards in real-time, specially developed for this purpose (R Studio/Shiny®,  
59  
60

1  
2  
3 Boston, MA, USA). In addition, monthly remote meetings between the local ICU team  
4  
5 and the respective tele-intensivist are organized to discuss these indicators and to  
6  
7 establish possible improvement action plans.  
8  
9

### 10 11 12 13 *Control Group (usual care)*

14  
15 No interventions are delivered to the ICUs randomised to the control group, except for the  
16  
17 systematic data collection required for the comparisons described in the trial objectives.  
18  
19 However, unlike in the ICUs of the intervention group, these data are not available for the  
20  
21 care team nor to the coordination of the participating ICUs.  
22  
23  
24  
25  
26  
27

### 28 **Sites**

29  
30 The list of potential units was retrieved from the national registry of health facilities  
31  
32 (“Cadastro Nacional de Estabelecimentos de Saúde – CNES”, in Portuguese), filtering those  
33  
34 facilities with at least 8 ICU adult beds available.  
35  
36  
37  
38  
39

### 40 Inclusion/Exclusion

41  
42 The ICUs are invited by electronic means for an interview in which the eligibility and feasibility  
43  
44 criteria below will be verified.  
45  
46  
47  
48  
49

### 50 *Inclusion criteria for ICUs*

- 51  
52
- 53 • ICUs of public or philanthropic hospitals
  - 54 • ICUs with a minimum of 8 ICU beds
  - 55 • ICUs with on-site registered doctors and nurses
- 56  
57  
58  
59  
60

### *Exclusion criteria for ICUs*

- ICUs that already presented DMRs, defined as:
  - Meetings (DMRs)  $\geq 3$  times per week, during weekdays, conducted by a certified intensivist and documented in medical records with fixed visit length (>5 min / patient), using some supporting tool (checklist or standard form), goal-oriented, based on established protocols, including all the patients admitted to the ICU.
  - or
  - Monthly management of indicators (audit and feedback) with specific planning.
- Specialized ICUs (ICUs admitting exclusively cardiac surgery, neurological, burned patients).
- Step-down units or coronary units

### **Patients**

All consecutive patients that fulfil the inclusion criteria and none of the exclusion criteria will be enrolled.

### **Inclusion/Exclusion**

The patients admitted in the ICU who currently meet the following inclusion criteria are included:

- Age  $\geq 18$  years old
- Patients admitted to the ICU after the beginning of the trial

### *Exclusion criteria for patients*

- Patients admitted to the ICU due to justice-related issues (since in such circumstances the ICU admission or discharge may be determined by law and not medical reasons)
- Patients previously included in the TELESCOPE trial (for the analysis of the primary outcome).

### **Randomisation**

The 30 ICUs are randomly assigned to either the intervention group (n=15) or the control group (n=15) using a restricted randomisation approach to ensure balance across the groups using the following variables at the ICU level: number of ICU beds, mean SAPS 3, mean ICU LOS, SMR, SRU, and a dummy indicator for Brazilian region where the ICU is located (South/Southeast x North/Northeast/Central-West).<sup>28 29</sup> The randomisation unit will be the ICU to avoid contamination of the intervention. Only one ICU per hospital will be included in the trial. The randomisation is performed in blocks, sizes of 14, 7 and 9, following the completion of the baseline period. To ensure allocation concealment, the statistician responsible for the randomisation list receives only the ICU identifier code, being unaware of which unit it refers to. The allocation list is sent to the study coordinator, who informs the ICUs about the randomisation. The allocation will be maintained until the end of the study.

### **Blinding**

The intervention is open, due to the nature of the study (Tele-ICU rounds, quality improvement meetings and delivery of evidence-based clinical protocols). The steering and scientific committees are blinded of the DMRs and monthly feedback/audit meetings.

### **Follow-up**

Patients are followed up until hospital discharge by the health care worker responsible for data collection.

### **Outcomes**

#### Primary outcome

At an individual level, the primary outcome of this trial is ICU length of stay, measured in days, taking into account the time interval in hours between patients' ICU admission and time of transfer to another care facility or another hospital, as defined by the hospital's system date and time. Date and time will be entered by the health care worker responsible for data collection.

#### Secondary exploratory outcomes

The secondary outcomes of this study include assessing the impact of interventions implemented through Telemedicine compared to a control group in the following outcomes:

- Classification of the unit according to the profiles defined by the standardized resource use (SRU) and the standardized mortality rate (SMR).<sup>30</sup> The SRU reflects the observed / expected rate of resources used (estimated as ICU length of stay for surviving patients), adjusted by patient's severity of illness.<sup>31 32</sup> The SMR reflects the observed / expected rate (according to severity score) of hospital deaths. The profiles are a combination of SMR (above or below median) and SRU (above or below median)  
: Each unit can be assigned to one of four groups: "most efficient" (SMR and SRU <

1  
2  
3 median); "least efficient" (SMR, SRU > median); "overachieving" (low SMR, high SRU),  
4  
5 "underachieving" (high SMR, low SRU)<sup>31</sup>  
6  
7

- 8  
9
- 10 • In-hospital mortality, defined as death by any cause from date of ICU admission until  
11 the date of hospital discharge or death, whichever comes first  
12
  - 13 • Incidence of central line-associated bloodstream infection (CLABSI), as defined by the  
14 CDC<sup>33</sup>  
15
  - 16 • Incidence of ventilator-associated event (VAE), as defined by the CDC<sup>34</sup>  
17
  - 18 • Incidence of catheter-associated urinary tract infection (CAUTI), as defined by the  
19 CDC<sup>35</sup>  
20
  - 21 • Ventilator-free days at 28 days, defined as the number of days from successfully  
22 weaning to day 28; patients who died before weaning were deemed to have no  
23 ventilator-free days  
24
  - 25 • Patient-days receiving oral or enteral feeding, defined as any amount oral or enteral  
26 diet  
27
  - 28 • Patient-days under light sedation or alert and calm [Richmond Agitation-Sedation  
29 Scale (RASS) = -3 to +1]  
30
  - 31 • Rate of patients under normoxaemia [peripheral oxygen saturation (SpO<sub>2</sub>) between  
32 92% and 96%]  
33  
34  
35  
36  
37  
38  
39  
40  
41  
42  
43  
44  
45  
46  
47  
48  
49

#### 50 *Other exploratory outcomes*

51  
52 Other outcomes, considered merely exploratory, will be observed:

- 53  
54
- 55 • ICU mortality  
56
  - 57 • 24-hour ICU readmission rate  
58
  - 59 • Proportion of mechanical ventilation (MV) use  
60

- Early reintubation rate (<48h after extubation)
- Accidental extubation rate
- Compliance to head of bed elevation for patient under MV
- Rate of central venous catheter (CVC) use and duration
- Rate of urinary catheter use and duration
- Adequate prevention of venous thromboembolism (VTE)
- Rate of patients with adequate glycaemic control

We will truncate the primary and secondary outcomes follow-up at 90 days.

### **Data collection**

At the patient level, the following data is collected (Table 2):

*At the time of ICU admission:*

- Identifier, date of birth, gender, main reason of ICU admission (adapted from APACHE III),<sup>36</sup> readmission status
- Anthropometric characteristics, comorbidities (adapted from SAPS3),<sup>37</sup> functional status (adapted from ECOG)<sup>37</sup>
- Respiratory, cardiovascular, and renal support
- Diet and sedation status
- Presence of devices: central venous catheter, arterial line, permanent catheters, urinary catheter, oro/naso-tracheal catheter and tracheostomy
- Date and time of hospital admission
- Date and time of ICU admission

- 1
- 2
- 3 • Simplified Acute Physiology (SAPS 3) score<sup>32</sup>
- 4
- 5
- 6 • Sequential organ failure assessment (SOFA) score<sup>38 39</sup>
- 7
- 8
- 9

10 *Throughout the ICU admission:*

- 11
- 12
- 13 • Documented goals from the DMR
- 14
- 15 • Documented discharge order status, defined as any mention to readiness to discharge
- 16 or ICU transference order
- 17
- 18 • MV status and mechanical ventilation parameters
- 19
- 20 • SpO<sub>2</sub> range for patients on oxygen therapy
- 21
- 22 • Head of bed elevation for patients under MV
- 23
- 24 • Spontaneous respiratory test, accidental extubation or re-intubation events
- 25
- 26 • Need of vasoactive drugs and renal replacement therapy
- 27
- 28 • Continuous sedative infusion and light sedation strategy (reduction/daily
- 29 interruption)
- 30
- 31 • Daily value (categorized below, above or within -3 to +1 range) of the RASS for patients
- 32 undergoing continuous sedation at a predetermined time
- 33
- 34 • Adequacy of VTE prophylaxis: considered adequate when patient is bedridden without
- 35 any of the following exclusion criteria: active bleeding, stress gastric ulcer,
- 36 uncontrolled arterial hypertension (>180/110 mmHg), coagulation disorder, allergy,
- 37 kidney failure (Cl<30 ml/min), ocular or cranial surgery in last 2 weeks, and lumbar
- 38 puncture in last 24h).
- 39
- 40 • Presence of oral or enteral nutrition
- 41
- 42 • Glycemic control: considered adequate if between 60 to 180 mg/dL
- 43
- 44
- 45
- 46
- 47
- 48
- 49
- 50
- 51
- 52
- 53
- 54
- 55
- 56
- 57
- 58
- 59
- 60



- 1  
2  
3  
4  
5  
6  
7  
8  
9  
10  
11  
12  
13  
14  
15  
16  
17  
18  
19  
20  
21  
22  
23  
24  
25  
26  
27  
28  
29  
30  
31  
32  
33  
34  
35  
36  
37  
38  
39  
40  
41  
42  
43  
44  
45  
46  
47  
48  
49  
50  
51  
52  
53  
54  
55  
56  
57  
58  
59  
60
- Notification of health-care-related infection episodes according to CDC (Centers for Disease Control and Prevention) criteria:
    - Central-line associated bloodstream infection (CLABSI)<sup>33</sup>
    - Ventilator-associated events (VAE)<sup>34</sup>
    - Catheter-associated urinary tract infection (CAUTI)<sup>35</sup>
    - Date and time of central venous catheter (CVC) insertion for patients undergoing CVC insertion
  - Date and time of withdrawal of CVC for patients undergoing CVC insertion
  - Date and time of indwelling urinary catheter (IUC) insertion for patients submitted to IUC insertion
  - Date and time of withdrawal of IUC for patients undergoing IUC insertion
  - Documentation of decisions for limiting the life support considering any mention to withholding or withdrawing in the medical records

*At the time of ICU discharge*

- Date and time of ICU discharge
- ICU outcome: discharge to ward, hospital transfer, death

*At the time of hospital discharge*

- Date and time of hospital discharge
- Hospital outcome: hospital transfer, death

## Data collection and management

Trained health care workers collect data, without any involvement from the study committees and investigators. We developed a standard CRFs for the trial, with extensive validation and piloting aiming clarity and consistency.

Data is input using electronic CRFs in the Research Electronic Data Capture system (REDCap®, USA) via Internet and hosted on a server at the Hospital Israelita Albert Einstein/São Paulo - Brazil. Medical data from tele-intensivist consultations is generated and stored using a specific platform developed by the Tele-ICU Department of the Hospital Israelita Albert Einstein/São Paulo - Brazil. Images and audio are never saved or stored. The electronic files are stored in the hospital's servers in a controlled and secure environment to guarantee confidentiality. Furthermore, access to all documents is user and password controlled. To ensure data quality, the following procedures are performed:

- All professionals responsible for data collection are trained before the beginning of the trial in order to guarantee clear definitions for accurate data collection;
- A research nurse from the Coordinating Centre is available 24/7 to solve any problem and question about data collection;
- Data input in the system are submitted to near real-time verifications to detect missing data, values outside expected and logic patterns;
- Remote data monitoring is performed regularly to detect patterns of anomalies, consistency or credibility problems and other anomalies – according to pre-established queries created by the system. Any missing data or outlier is individually reviewed for inspection;
- The Coordinating Centre reviews follow-up reports regularly to ensure their consistency and completeness;

- Centre monitoring is performed while the study is being conducted. A trained professional is assigned by the Coordinating Centre to monitor the study participating centres. All the information obtained during the monitoring visits are strictly confidential.

## Monitoring

### *Interim analyses*

Since our intervention gathers the best available evidence for care of critically ill patients admitted to the ICUs, and we do not predict inherent risks in the performance of the trial, interim analyses are not planned. Therefore, a formal Data Monitoring Committee was deemed unneeded. Adverse events are not expected to occur but could be reported by local researchers, data assistants, and local doctors.

### *Intervention Monitoring*

Considering the study aim is to evaluate the impact of a complex intervention (composed by DMR, management of ICU performance indicators, and provision of clinical protocols), specific data (implementation indicators) will be collected and followed in order to ensure adherence to the protocol:

- a) DMR rate per site/bed/day, and DMR duration (including individual and periodic feedback to each tele-intensivist).
- b) Rate of recommendations made, and validated (accepted and not accepted) / DMR
- c) Monthly meeting on performance indicators reports: tele-intensivists will send to study team monthly reports including the executive summary (file sent to the leaderships of each study center/intervention arm, before the

1  
2  
3 monthly meeting) and the meeting record file (structured data about  
4 highlighted indicators, action plan, responsibility, and due dates).  
5  
6

7  
8 d) Access to the clinical protocols: absolute number of accesses to the video-  
9 protocols will be provided and followed.  
10  
11

### 12 13 **Auditing**

14  
15 Trial conduct is subjected to audit by Einstein Research Integrity Committee, at any time,  
16 independently of the IRB and research team, the same way as any interventional studies  
17 performed at Albert Einstein Hospital (random selection).  
18  
19

### 20 21 **Power/Sample size calculation**

22  
23 We estimated a mean ICU length-of-stay of 8 [standard deviation (SD) 10] days for general  
24 adult public ICUs in Brazil. We used data from published literature and reports from the online  
25 project "UTIs Brasileiras".<sup>40</sup> Using data from 20 ICUs (10 ICUs from Ranzani et al,<sup>41</sup> 10 ICUs  
26 from the ORCHESTRA study,<sup>42</sup> available in the *ems* R package), we estimated an intraclass  
27 correlation coefficient of 0.018. Considering a two-arm cluster trial with an ICC of 0.018, for  
28 a minimum difference of an average length of stay of 1.5 days (8.0 to 6.5 days) and SD of 10  
29 days, power 80%, alpha 5%, we would need a total of 30 clusters (15 intervention units and  
30 15 control units) with an average cluster size of 500 patients per ICU over a period of 18  
31 months. If we use a coefficient of variation of cluster size, estimated by the expected  
32 minimum and maximum method, we will maintain 80% power if the difference between the  
33 clusters minimum and maximum size is 150 patients. If needed, after the baseline period, we  
34 might review the sample calculation and simulate the power for secondary outcomes, using  
35 the data from the selected ICUs.  
36  
37  
38  
39  
40  
41  
42  
43  
44  
45  
46  
47  
48  
49  
50  
51  
52  
53  
54  
55

### 56 57 **Analysis**

1  
2  
3 All analyses will be thoroughly described in a statistical analysis plan (SAP), which will be  
4 concluded and submitted for publishing prior to database closure and the beginning of  
5 analyses. Primary statistical analyses will be performed according to the intention-to-treat  
6 principle. All outcomes at the patient-level will be performed using models that account for  
7 correlated data within each ICU (ie, ICU as a cluster) with generalised linear mixed models  
8 and adjusted by pre-specified covariates, as will be specified in the SAP. Pre-specified  
9 secondary outcomes and subgroup analyses will not be adjusted for multiple comparisons.  
10 They should, therefore, be interpreted as exploratory. We pre-specified three subgroups:  
11 type of admission (medical vs. surgical), by tertiles of SAPS3 and mechanical ventilation status  
12 (invasive MV vs. not-invasive MV). Sub-groups will be analyzed as an interaction term.  
13  
14  
15  
16  
17  
18  
19  
20  
21  
22  
23  
24  
25  
26  
27

28 We will evaluate the calibration of the SAPS3 model with data from the baseline  
29 period. If necessary, we will recalibrate the model for the studied population. All analyses will  
30 be performed with program R (3.4.1 version, the version will be updated at the time of  
31 analysis).  
32  
33  
34  
35  
36  
37  
38  
39

## 40 **ETHICS AND DISSEMINATION**

41  
42 The project was approved by local Research Ethics Committee (IRB) of the  
43 coordinating study centre (Hospital Israelita Albert Einstein) (CAAE: 01523118.0.1001.0071)  
44 and by the local IRB from each one of the 30 ICUs (supplementary file 2), following the  
45 Brazilian legislation. A specialist in regulatory process will oversee and support the local  
46 process. Any modifications in the protocol that might affect the development of the study  
47 and its potential benefits or safety, including changes in the objectives, design, study  
48 population, sample size, interventions or relevant management aspects, will require  
49 amendments to the protocol. Such amendments should be submitted to the IRB of the  
50  
51  
52  
53  
54  
55  
56  
57  
58  
59  
60

1  
2  
3 coordinating centre and all the IRBs at the participating centre for proper approval. There will  
4  
5 be rigorous procedures of protocol version control.  
6  
7

8 The need for patients' written informed consent was waived in all 30 centres. For one  
9  
10 centre, it was requested written informed consent for health care professionals involved in  
11  
12 the tele-ICU visits. We obtained written agreement from the Director of each institution as  
13  
14 well as by the ICU coordinator.<sup>43-46</sup>  
15  
16

17  
18 Therefore, the set interventions are not specifically directed to the patients but to the  
19  
20 whole cluster together: the ICU (intervention type A).<sup>47</sup> In this type of interventions, there is  
21  
22 only one decision to be made for each cluster and individual choice are not appropriated.<sup>47</sup>  
23  
24 In this sense, informed consent was proposed and signed in the cluster-level. In the best  
25  
26 interest of patients, medical teams and other professionals, the Hospital Director and the  
27  
28 Head of ICU (Physician) were the responsible to sign the consent form. This proposal was  
29  
30 approved by all the involved IRBs (coordinating centre and the IRBs of each one of the 30  
31  
32 participant hospitals).  
33  
34  
35

36  
37 All the information in the study will be stored (in paper and/or magnetic media) at  
38  
39 the coordinating centre. All patient-level data will be anonymized, and will be accessed only  
40  
41 by the data manager and statistician. Access to information from the participants (during the  
42  
43 visits) will be restricted to the intensivists performing daily rounds via Telemedicine. All  
44  
45 records with names or other identifiers will be stored separately from the study records.  
46  
47 Information on patients will not be disclosed except for regulatory purposes.  
48  
49  
50

51  
52 The TELESCOPE study Steering Committee commits to publishing the study results,  
53  
54 whatever they may be. The results of this study will be mainly disseminated through  
55  
56 international scientific publication. The main result of this project will be reported in an  
57  
58 article and sub-studies are planned. Results of this project are expected to be presented in  
59  
60

1  
2  
3 major sessions at national and international congresses, especially in the field of intensive  
4 care medicine. Study results are expected to be promoted to the lay press and disseminated  
5  
6 in various media outlets due to its impact on the health system.  
7  
8  
9

## 10 11 12 13 **TRIAL STATUS**

14  
15 This paper presents the protocol for the TELESCOPE trial (original version, 1.0, approved in  
16 07/11/2018). The baseline period started on 01/06/2019. First randomisation block and  
17  
18 interventions started in 05/08/2019. At the time of first version of the manuscript submission,  
19  
20 data collection for the trial was ongoing and due to be complete in the first semester of 2021.  
21  
22  
23  
24  
25  
26  
27

## 28 **ADDITIONAL INFORMATION**

### 29 30 31 32 **Funding**

33  
34 The study was conducted in partnership with the Brazilian Ministry of Health through the  
35 Institutional Development Program of the Unified Health System (PROADI - SUS, NUP  
36 25000.018804/2018-23.), and classified in one of the objectives of the National Health Plan,  
37  
38 highlighting the relevance and potential contribution of the project to the governance of the  
39  
40 SUS, according to the ordinance 3.362, 12/8/2017.  
41  
42  
43  
44  
45  
46  
47  
48  
49

### 50 **Authorship**

51  
52 Authorship will follow current guidelines of International Committee of Medical Journal  
53  
54 Editors (ICMJE). Executive and Steering Committee are planned to be list as authors/co-  
55  
56 authors, since fulfilling authorship criteria (substantive contributions to the design, conduct,  
57  
58 interpretation, and reporting of a clinical trial). If some protocol authors are not named  
59  
60

1  
2  
3 author info publications (not fulfil such criteria), their names will be acknowledged in the  
4  
5 reports. Three main papers are planned: Protocol paper, Statistical Analysis Plan, Main Paper  
6  
7 (trial results). Principal Investigator - AJP, Senior Researcher - DTN and OTR - Statistician  
8  
9 Specialist will share and alternate in first, second and last positions. Local PIs will be cited as  
10  
11 collaborators in the main paper. The same is planned for abstracts or oral presentations in  
12  
13 international meetings. Disputes regarding authorship will be settled by the Study Chair and  
14  
15 Executive Committee. Professional writer's participations are not planned.  
16  
17  
18  
19  
20  
21  
22

### 23 **Competing interests**

24  
25 None declared.  
26  
27  
28  
29

### 30 **Patient consent**

31  
32 Not required.  
33  
34  
35  
36  
37

### 38 **Patient and public involvement**

39  
40 This research was done without patient involvement in its design or development. Patients  
41  
42 were not invited to contribute to the writing or editing of this document for readability or  
43  
44 accuracy. This was due to logistic limitations (critical care patients in a national wide study).  
45  
46 Outcomes were chosen according to traditional indicators in the critical care area.  
47  
48  
49  
50  
51

### 52 **Ethics approval**

53  
54 This study will be conducted according to the resolution no 466/12 of the Brazilian National  
55  
56 Health Council  
57  
58 ([http://bvsmms.saude.gov.br/bvs/saudelegis/cns/2013/res0466\\_12\\_12\\_2012.html](http://bvsmms.saude.gov.br/bvs/saudelegis/cns/2013/res0466_12_12_2012.html)). The  
59  
60



1  
2  
3 study protocol has been approved by the Research Ethics Committee of the coordinating  
4  
5 site (approval number: CAAE 01523118.0.1001.0071) and the Research Ethics Committees  
6  
7  
8 of all participant institutions (supplementary file 2).  
9  
10  
11  
12

### 13 **Acknowledgments**

14  
15 The authors would like to thank the central TELESCOPE team, data collection team of each  
16  
17 participating ICU, as well as the Hospital Israelita Albert Einstein, the Brazilian Ministry of  
18  
19 Health, and the Brazilian Research in Intensive Care Network (BRICNET) for their support in  
20  
21 conducting the study.  
22  
23  
24  
25  
26  
27  
28  
29  
30  
31  
32  
33  
34  
35  
36  
37  
38  
39  
40  
41  
42  
43  
44  
45  
46  
47  
48  
49  
50  
51  
52  
53  
54  
55  
56  
57  
58  
59  
60

## REFERENCES

1. Angus DC, Linde-Zwirble WT, Lidicker J, et al. Epidemiology of severe sepsis in the United States: analysis of incidence, outcome, and associated costs of care. *Crit Care Med* 2001;29(7):1303-10. [published Online First: 2001/07/11]
2. Rubenfeld GD, Caldwell E, Peabody E, et al. Incidence and outcomes of acute lung injury. *N Engl J Med* 2005;353(16):1685-93. doi: 353/16/1685 [pii] 10.1056/NEJMoa050333
3. Adhikari NK, Fowler RA, Bhagwanjee S, et al. Critical care and the global burden of critical illness in adults. *Lancet* 2010;376(9749):1339-46. doi: 10.1016/s0140-6736(10)60446-1 [published Online First: 2010/10/12]
4. Needham DM, Bronskill SE, Calinawan JR, et al. Projected incidence of mechanical ventilation in Ontario to 2026: Preparing for the aging baby boomers. *Crit Care Med* 2005;33(3):574-9. [published Online First: 2005/03/09]
5. Angus DC, Barnato AE, Linde-Zwirble WT, et al. Use of intensive care at the end of life in the United States: an epidemiologic study. *Crit Care Med* 2004;32(3):638-43.
6. Burden of disease in Brazil, 1990-2016: a systematic subnational analysis for the Global Burden of Disease Study 2016. *Lancet* 2018;392(10149):760-75. doi: 10.1016/s0140-6736(18)31221-2 [published Online First: 2018/07/25]
7. Barreto MdS, Carreira, L., & Marcon, S.S. Envelhecimento populacional e doenças crônicas: Reflexões sobre os desafios para o Sistema de Saúde Pública. *Revista Kairós Gerontologia* 2015;18(1) [published Online First: 339]
8. Lima-Costa MF, De Oliveira C, Macinko J, et al. Socioeconomic inequalities in health in older adults in Brazil and England. *American journal of public health* 2012;102(8):1535-41. doi: 10.2105/ajph.2012.300765 [published Online First: 2012/06/16]
9. Veras RP, Oliveira M. Aging in Brazil: the building of a healthcare model. *Ciencia & saude coletiva* 2018;23(6):1929-36. doi: 10.1590/1413-81232018236.04722018 [published Online First: 2018/07/05]
10. Ball IM, Bagshaw SM, Burns KE, et al. Outcomes of elderly critically ill medical and surgical patients: a multicentre cohort study. *Canadian journal of anaesthesia = Journal canadien d'anesthesie* 2017;64(3):260-69. doi: 10.1007/s12630-016-0798-4 [published Online First: 2016/12/29]
11. Chin-Yee N, D'Egidio G, Thavorn K, et al. Cost analysis of the very elderly admitted to intensive care units. *Crit Care* 2017;21(1):109. doi: 10.1186/s13054-017-1689-y [published Online First: 2017/05/17]
12. Zampieri FG, Iwashyna TJ, Vigiante EM, et al. Association of frailty with short-term outcomes, organ support and resource use in critically ill patients. *Intensive Care Med* 2018;44(9):1512-20. doi: 10.1007/s00134-018-5342-2
13. Valley TS, Noritomi DT. ICU beds: less is more? Yes. *Intensive Care Med* 2020 doi: 10.1007/s00134-020-06042-1
14. Lane D, Ferri M, Lemaire J, et al. A systematic review of evidence-informed practices for patient care rounds in the ICU\*. *Crit Care Med* 2013;41(8):2015-29. doi: 10.1097/CCM.0b013e31828a435f [published Online First: 2013/05/15]
15. Pronovost PJ, Angus DC, Dorman T, et al. Physician staffing patterns and clinical outcomes in critically ill patients: a systematic review. *JAMA* 2002;288(17):2151-62.
16. Kim MM, Barnato AE, Angus DC, et al. The effect of multidisciplinary care teams on intensive care unit mortality. *Arch Intern Med* 2010;170(4):369-76. doi: 10.1001/archinternmed.2009.521 [published Online First: 2010/02/24]
17. Medicine Io. Telemedicine: A Guide to Assessing Telecommunications for Health Care. Washington, DC: The National Academies Press 1996.

18. Grundy BL, Crawford P, Jones PK, et al. Telemedicine in critical care: an experiment in health care delivery. *Jacep* 1977;6(10):439-44. [published Online First: 1977/10/01]
19. Vranas KC, Slatore CG, Kerlin MP. Telemedicine Coverage of Intensive Care Units: A Narrative Review. *Annals of the American Thoracic Society* 2018 doi: 10.1513/AnnalsATS.201804-225FR [published Online First: 2018/08/10]
20. Kahn JM, Cicero BD, Wallace DJ, et al. Adoption of ICU telemedicine in the United States. *Crit Care Med* 2014;42(2):362-8. doi: 10.1097/CCM.0b013e3182a6419f [published Online First: 2013/10/23]
21. Lilly CM, Zubrow MT, Kempner KM, et al. Critical care telemedicine: evolution and state of the art. *Crit Care Med* 2014;42(11):2429-36. doi: 10.1097/ccm.0000000000000539 [published Online First: 2014/08/01]
22. Lilly CM, Fisher KA, Ries M, et al. A national ICU telemedicine survey: validation and results. *Chest* 2012;142(1):40-47. doi: 10.1378/chest.12-0310 [published Online First: 2012/04/21]
23. Fuhrman SA, Lilly CM. ICU Telemedicine Solutions. *Clinics in chest medicine* 2015;36(3):401-7. doi: 10.1016/j.ccm.2015.05.004 [published Online First: 2015/08/26]
24. Young LB, Chan PS, Lu X, et al. Impact of telemedicine intensive care unit coverage on patient outcomes: a systematic review and meta-analysis. *Arch Intern Med* 2011;171(6):498-506. doi: 10.1001/archinternmed.2011.61 [published Online First: 2011/03/30]
25. Wilcox ME, Adhikari NK. The effect of telemedicine in critically ill patients: systematic review and meta-analysis. *Crit Care* 2012;16(4):R127. doi: 10.1186/cc11429 [published Online First: 2012/07/20]
26. Chen J, Sun D, Yang W, et al. Clinical and Economic Outcomes of Telemedicine Programs in the Intensive Care Unit: A Systematic Review and Meta-Analysis. *J Intensive Care Med* 2018;33(7):383-93. doi: 10.1177/0885066617726942
27. Chan AW, Tetzlaff JM, Altman DG, et al. SPIRIT 2013 statement: defining standard protocol items for clinical trials. *Ann Intern Med* 2013;158(3):200-7. doi: 10.7326/0003-4819-158-3-201302050-00583 [published Online First: 2013/01/09]
28. Carter BR, Hood K. Balance algorithm for cluster randomized trials. *BMC Med Res Methodol* 2008;8:65. doi: 10.1186/1471-2288-8-65
29. Richards-Belle A, Mouncey PR, Wade D, et al. Psychological Outcomes following a nurse-led Preventative Psychological Intervention for critically ill patients (POPPI): protocol for a cluster-randomised clinical trial of a complex intervention. *BMJ Open* 2018;8(2):e020908. doi: 10.1136/bmjopen-2017-020908
30. Rapoport J, Teres D, Lemeshow S, et al. A method for assessing the clinical performance and cost-effectiveness of intensive care units: a multicenter inception cohort study. *Crit Care Med* 1994;22(9):1385-91. [published Online First: 1994/09/01]
31. Rothen HU, Stricker K, Einfalt J, et al. Variability in outcome and resource use in intensive care units. *Intensive Care Med* 2007;33(8):1329-36. doi: 10.1007/s00134-007-0690-3 [published Online First: 2007/06/02]
32. Moreno RP, Metnitz PG, Almeida E, et al. SAPS 3--From evaluation of the patient to evaluation of the intensive care unit. Part 2: Development of a prognostic model for hospital mortality at ICU admission. *Intensive Care Med* 2005;31(10):1345-55. doi: 10.1007/s00134-005-2763-5
33. Centers for Disease Control and Prevention. Bloodstream Infection Event (Central Line-Associated Bloodstream Infection and Non-central Line Associated Bloodstream Infection) 2018 [Available from:

- 1  
2  
3 [https://www.cdc.gov/nhsn/PDFs/pscManual/4PSC\\_CLABSCurrent.pdf](https://www.cdc.gov/nhsn/PDFs/pscManual/4PSC_CLABSCurrent.pdf) accessed  
4 September 2018.  
5  
6 34. Centers for Disease Control and Prevention. Pneumonia (Ventilator-associated [VAP] and  
7 non-ventilator-associated Pneumonia [PNEU]) Event 2018 [Available from:  
8 <https://www.cdc.gov/nhsn/pdfs/pscmanual/6pscvcapcurrent.pdf> accessed September  
9 2018.  
10  
11 35. Centers for Disease Control and Prevention. Urinary Tract Infection (Catheter-Associated  
12 Urinary Tract Infection [CAUTI] and Non-Catheter-Associated Urinary Tract Infection  
13 [UTI]) and Other Urinary System Infection [USI]) Events 2018 [Available from:  
14 <https://www.cdc.gov/nhsn/pdfs/pscmanual/7psccauticurrent.pdf> accessed September  
15 2018.  
16  
17 36. Knaus WA, Wagner DP, Draper EA, et al. The APACHE III prognostic system. Risk  
18 prediction of hospital mortality for critically ill hospitalized adults. *Chest*  
19 1991;100:1619-36.  
20  
21 37. Zampieri FG, Soares M, Borges LP, et al. The Epimed Monitor ICU Database(R): a cloud-  
22 based national registry for adult intensive care unit patients in Brazil. *Rev Bras Ter*  
23 *Intensiva* 2017;29(4):418-26. doi: 10.5935/0103-507X.20170062  
24  
25 38. Vincent JL, Moreno R, Takala J, et al. The SOFA (Sepsis-related Organ Failure  
26 Assessment) score to describe organ dysfunction/failure. On behalf of the Working  
27 Group on Sepsis-Related Problems of the European Society of Intensive Care  
28 Medicine. *Intensive Care Med* 1996;22:707-10.  
29  
30 39. Pandharipande PP, Shintani AK, Hagerman HE, et al. Derivation and validation of  
31 Spo2/Fio2 ratio to impute for Pao2/Fio2 ratio in the respiratory component of the  
32 Sequential Organ Failure Assessment score. *Crit Care Med* 2009;37(4):1317-21. doi:  
33 10.1097/CCM.0b013e31819cefa9  
34  
35 40. Society. TBCC. Brazilian ICUs Project. 2018 [Available from:  
36 <http://www.utisbrasileiras.com.br/perfis-das-utis/evolucao-do-smr-e-do-sruhospitalar/>  
37 [-!/evolutivo-da-turp-sru-hospitalar\)](http://www.utisbrasileiras.com.br/perfis-das-utis/evolucao-do-smr-e-do-sruhospitalar/) accessed 01/09/2018.  
38  
39 41. Ranzani OT, Simpson ES, Augusto TB, et al. Evaluation of a minimal sedation protocol  
40 using ICU sedative consumption as a monitoring tool: a quality improvement  
41 multicenter project. *Crit Care* 2014;18(5):580. doi: 10.1186/s13054-014-0580-3  
42  
43 42. Soares M, Bozza FA, Angus DC, et al. Organizational characteristics, outcomes, and  
44 resource use in 78 Brazilian intensive care units: the ORCHESTRA study. *Intensive*  
45 *Care Med* 2015;41(12):2149-60. doi: 10.1007/s00134-015-4076-7  
46  
47 43. Hutton JL, Eccles MP, Grimshaw JM. Ethical issues in implementation research: a  
48 discussion of the problems in achieving informed consent. *Implementation science : IS*  
49 2008;3:52. doi: 10.1186/1748-5908-3-52 [published Online First: 2008/12/19]  
50  
51 44. McRae AD, Weijer C, Binik A, et al. When is informed consent required in cluster  
52 randomized trials in health research? *Trials* 2011;12:202. doi: 10.1186/1745-6215-12-  
53 202 [published Online First: 2011/09/13]  
54  
55 45. Giraudeau B, Caille A, Le Gouge A, et al. Participant informed consent in cluster  
56 randomized trials: review. *PloS one* 2012;7(7):e40436. doi:  
57 10.1371/journal.pone.0040436 [published Online First: 2012/07/14]  
58  
59 46. Sim J, Dawson A. Informed consent and cluster-randomized trials. *American journal of*  
60 *public health* 2012;102(3):480-5. doi: 10.2105/ajph.2011.300389 [published Online  
First: 2012/03/07]  
47. Medical Research Council. Cluster randomised trials: Methodological and ethical  
considerations MRC clinical trials series. 2002. Available at:  
[https://www.cebm.org/wp-content/uploads/Cluster-randomised-trials-  
Methodological-and-ethical-considerations.pdf](https://www.cebm.org/wp-content/uploads/Cluster-randomised-trials-Methodological-and-ethical-considerations.pdf). Last access in January 5th, 2021.

## TABLES

Table 1. Intervention framework

| Component                                                                    | Frequency               | Tool                                                     | Goal                                              | Attendees                                                               |
|------------------------------------------------------------------------------|-------------------------|----------------------------------------------------------|---------------------------------------------------|-------------------------------------------------------------------------|
| Multidisciplinary rounds (DMR) by telemedicine                               | Daily (Monday – Friday) | Semi – structured patient electronic forms               | Establish a therapeutic plan for each ICU patient | Bedside clinicians, nurse and physiotherapists                          |
| Discussion of care performance indicators performed through virtual meetings | Monthly                 | Report with quality indicators (monthly temporal series) | Action Plan for suboptimal quality indicators     | Bedside clinicians, ICU head of department, quality improvement members |

**Table 2. Patient data collection schedule**

|                                          | Baseline period |       |           | After randomisation |       |           |
|------------------------------------------|-----------------|-------|-----------|---------------------|-------|-----------|
|                                          | Admission       | Daily | Discharge | Admission           | Daily | Discharge |
| Patient details                          | x               |       |           | x                   |       |           |
| Pre ICU events                           | x               |       |           | x                   |       |           |
| Type and cause of admission              | x               |       |           | x                   |       |           |
| Severity scores (SAPS 3 and SOFA)        | x               |       |           | x                   |       |           |
| Comorbidities / functional status        | x               |       |           | x                   |       |           |
|                                          |                 |       |           |                     |       |           |
| Treatment goals                          |                 | x     |           |                     | x     |           |
| Organ support and devices                | x               | x     |           | x                   | x     |           |
| Hospital-acquired infections             |                 | x     |           |                     | x     |           |
|                                          |                 |       |           |                     |       |           |
| Length of stay (ICU/Hospital)            |                 | x     | x         |                     | x     | x         |
| Mortality and destination (ICU/Hospital) |                 | x     | x         |                     | x     | x         |

ICU: intensive care unit; SAPS 3 score: simplified acute physiology score; SOFA score: sequential organ failure assessment score.

**FIGURES**

**Figure 1. Geographic distribution of the 30 ICUs participating in the TELESCOPE trial**

**Figure 2. Trial timeline, randomisation, intervention and follow-up**

ICU: intensive care unit; IRB: institutional review board

**Figure 3. Illustration of the multicomponent training of board-certified intensivists to act in the intervention arm**

ICU: intensive care unit; IHI: Institute for Healthcare Improvement

For peer review only

1  
2  
3  
4  
5  
6  
7  
8  
9  
10  
11  
12  
13  
14  
15  
16  
17  
18  
19  
20  
21  
22  
23  
24  
25  
26  
27  
28  
29  
30  
31  
32  
33  
34  
35  
36  
37  
38  
39  
40  
41





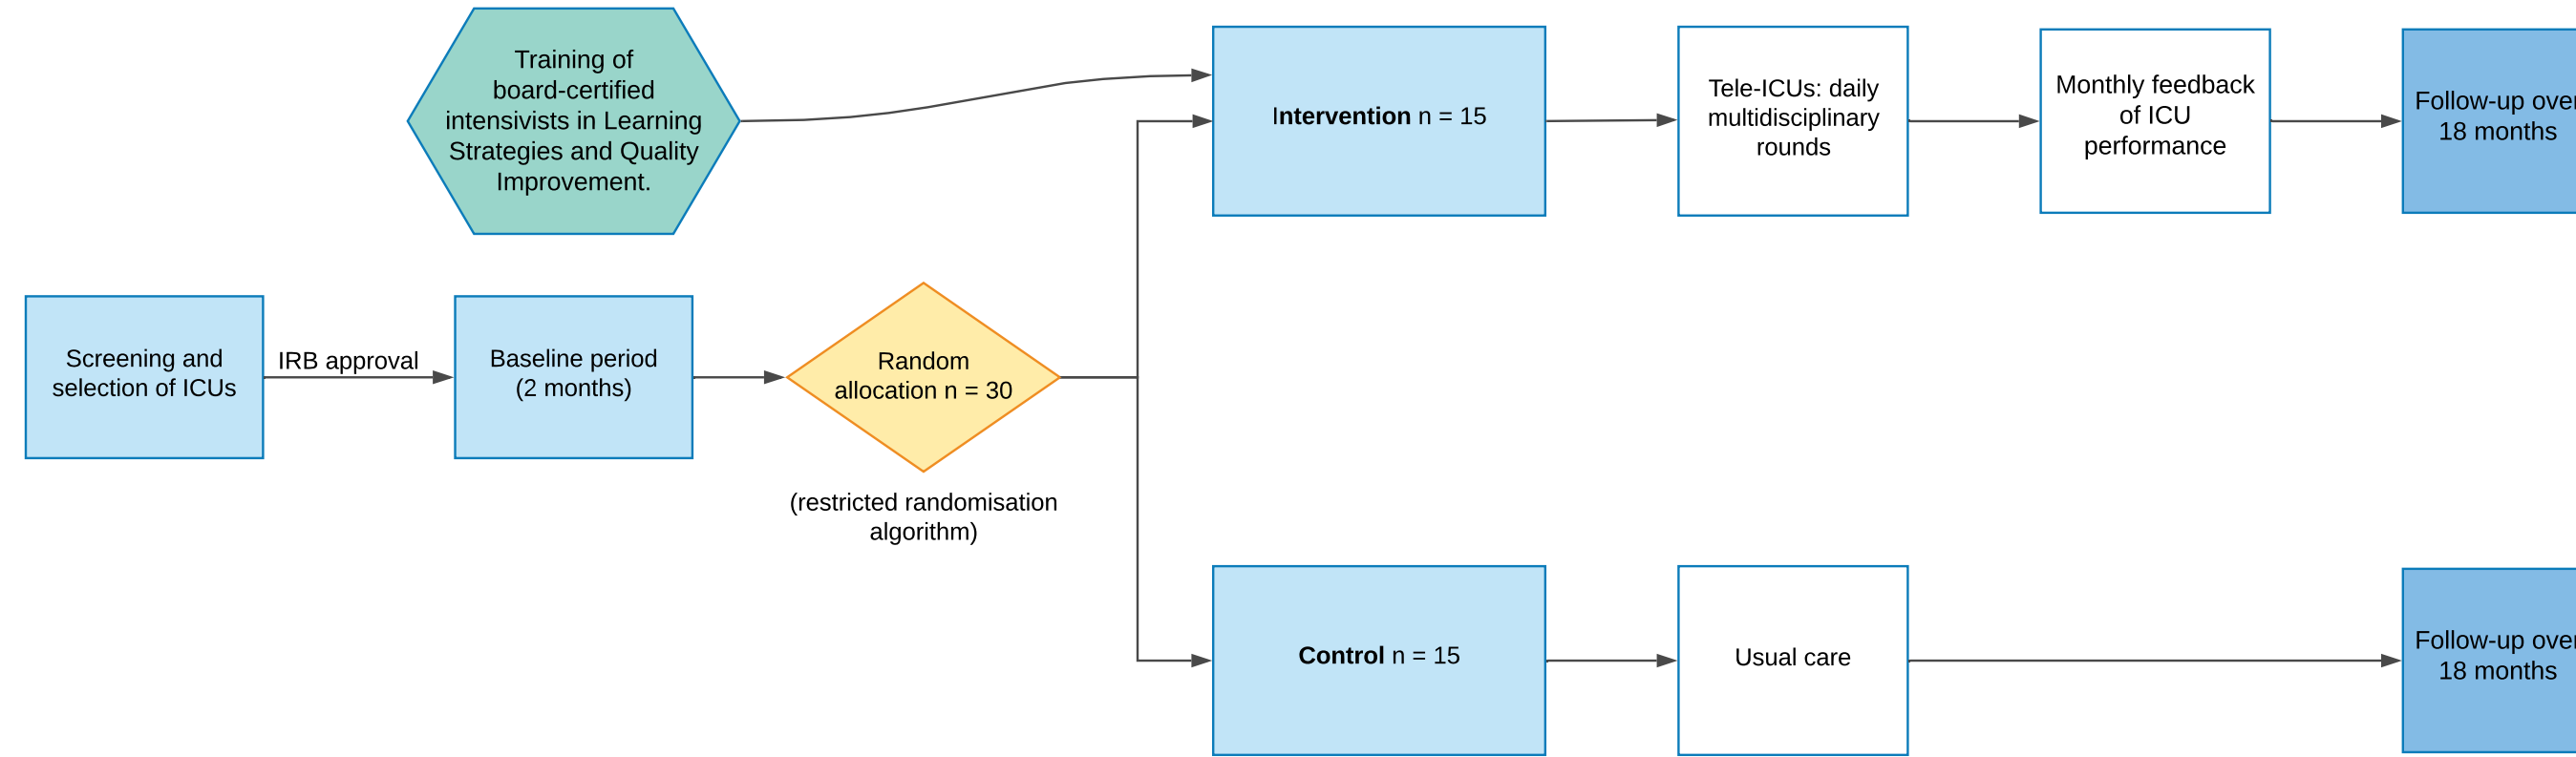

1  
2  
3  
4  
5  
6  
7  
8  
9  
10  
11  
12  
13  
14  
15  
16  
17  
18  
19  
20  
21  
22  
23  
24  
25  
26  
27  
28  
29  
30  
31  
32  
33  
34  
35  
36  
37  
38  
39  
40  
41  
42  
43  
44  
45  
46  
47  
48

1  
2  
3  
4  
5  
6  
7  
8  
9  
10  
11  
12  
13  
14  
15  
16  
17  
18  
19  
20  
21  
22  
23  
24  
25  
26  
27  
28  
29  
30  
31  
32  
33  
34  
35  
36  
37  
38  
39  
40  
41  
42  
43  
44  
45  
46  
47

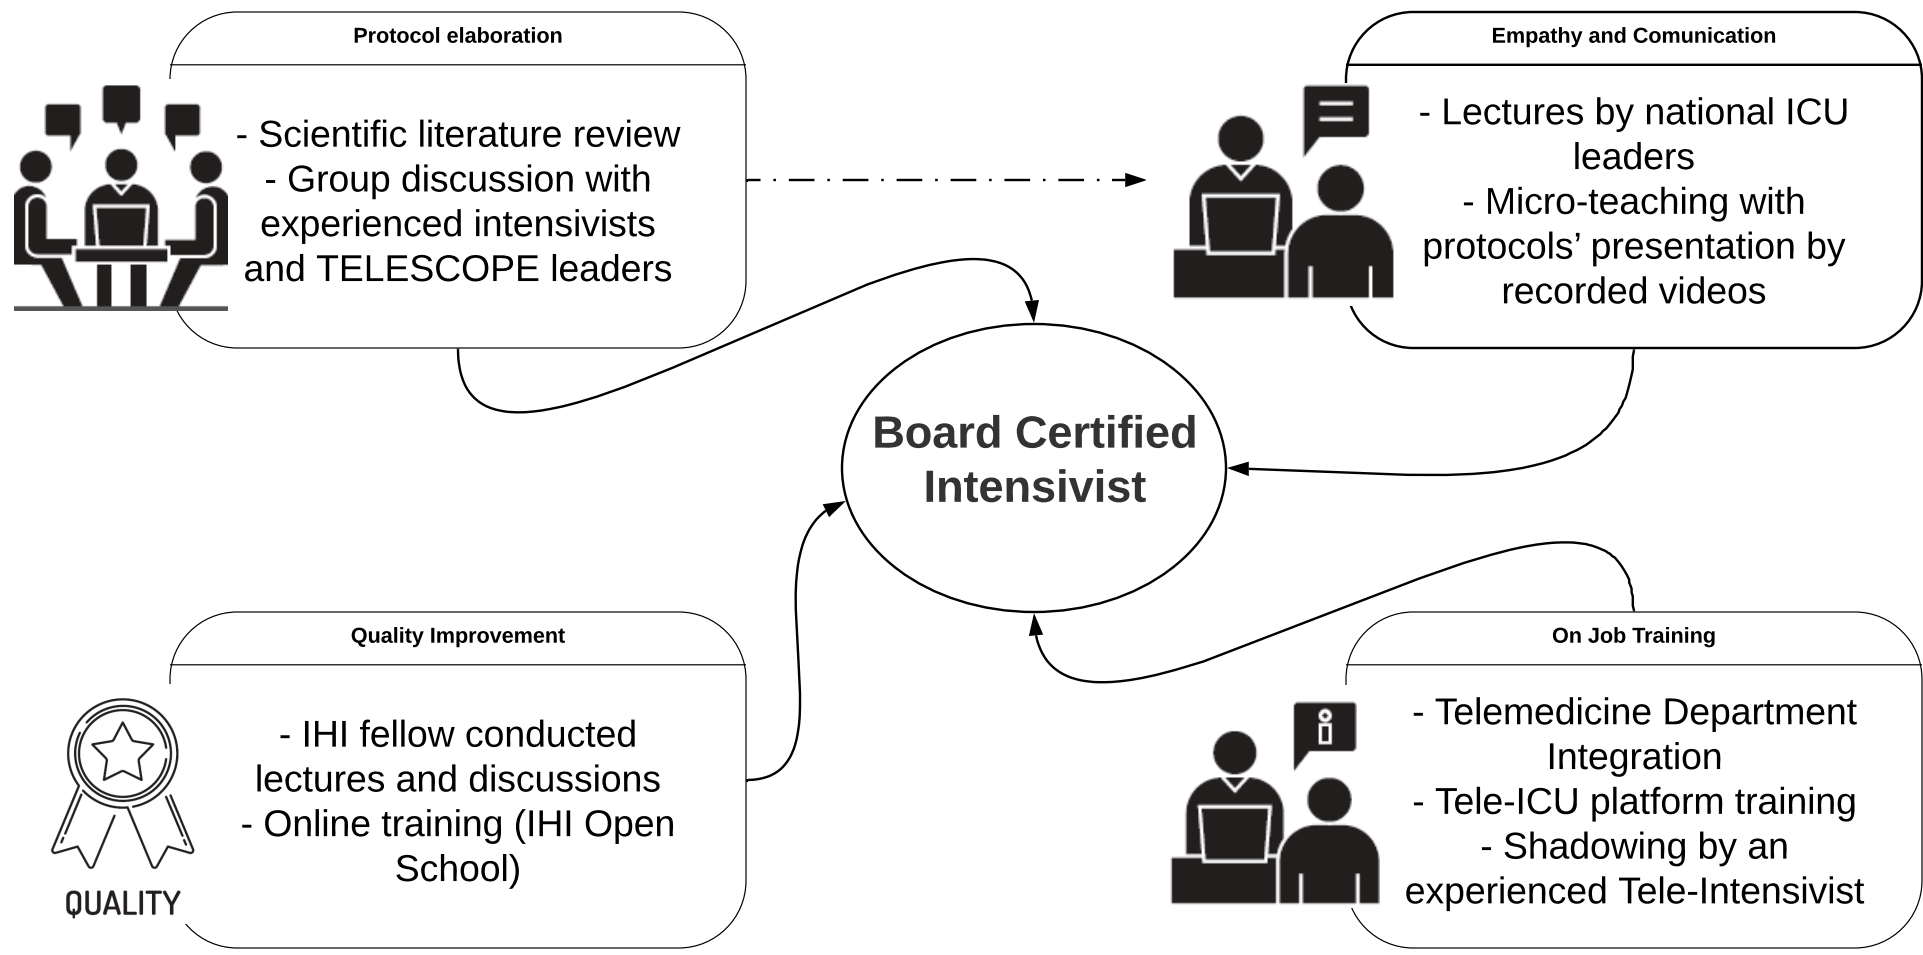

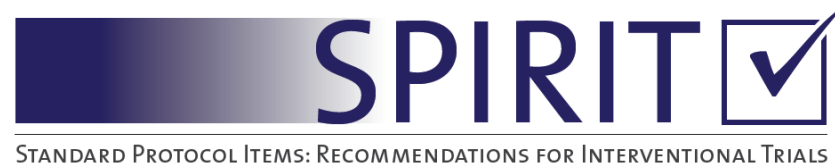

SPIRIT 2013 Checklist: Recommended items to address in a clinical trial protocol and related documents\*

| Section/item                      | Item No | Description                                                                                                                                                                                                                                                                              | Addressed on page number |
|-----------------------------------|---------|------------------------------------------------------------------------------------------------------------------------------------------------------------------------------------------------------------------------------------------------------------------------------------------|--------------------------|
| <b>Administrative information</b> |         |                                                                                                                                                                                                                                                                                          |                          |
| Title                             | 1       | Descriptive title identifying the study design, population, interventions, and, if applicable, trial acronym                                                                                                                                                                             | 01                       |
| Trial registration                | 2a      | Trial identifier and registry name. If not yet registered, name of intended registry                                                                                                                                                                                                     | 01                       |
|                                   | 2b      | All items from the World Health Organization Trial Registration Data Set                                                                                                                                                                                                                 | 02-04                    |
| Protocol version                  | 3       | Date and version identifier                                                                                                                                                                                                                                                              | 01 and 05                |
| Funding                           | 4       | Sources and types of financial, material, and other support                                                                                                                                                                                                                              | 01                       |
| Roles and responsibilities        | 5a      | Names, affiliations, and roles of protocol contributors                                                                                                                                                                                                                                  | 01                       |
|                                   | 5b      | Name and contact information for the trial sponsor                                                                                                                                                                                                                                       | 01                       |
|                                   | 5c      | Role of study sponsor and funders, if any, in study design; collection, management, analysis, and interpretation of data; writing of the report; and the decision to submit the report for publication, including whether they will have ultimate authority over any of these activities | 06                       |
|                                   | 5d      | Composition, roles, and responsibilities of the coordinating centre, steering committee, endpoint adjudication committee, data management team, and other individuals or groups overseeing the trial, if applicable (see Item 21a for data monitoring committee)                         | 07-10                    |

## Introduction

|                          |    |                                                                                                                                                                                                           |       |
|--------------------------|----|-----------------------------------------------------------------------------------------------------------------------------------------------------------------------------------------------------------|-------|
| Background and rationale | 6a | Description of research question and justification for undertaking the trial, including summary of relevant studies (published and unpublished) examining benefits and harms for each intervention        | 13-14 |
|                          | 6b | Explanation for choice of comparators                                                                                                                                                                     | 15-17 |
| Objectives               | 7  | Specific objectives or hypotheses                                                                                                                                                                         | 14    |
| Trial design             | 8  | Description of trial design including type of trial (eg, parallel group, crossover, factorial, single group), allocation ratio, and framework (eg, superiority, equivalence, noninferiority, exploratory) | 14-15 |

## Methods: Participants, interventions, and outcomes

|                      |     |                                                                                                                                                                                                                                                                                                                                                                                |       |
|----------------------|-----|--------------------------------------------------------------------------------------------------------------------------------------------------------------------------------------------------------------------------------------------------------------------------------------------------------------------------------------------------------------------------------|-------|
| Study setting        | 9   | Description of study settings (eg, community clinic, academic hospital) and list of countries where data will be collected. Reference to where list of study sites can be obtained                                                                                                                                                                                             | 14-15 |
| Eligibility criteria | 10  | Inclusion and exclusion criteria for participants. If applicable, eligibility criteria for study centres and individuals who will perform the interventions (eg, surgeons, psychotherapists)                                                                                                                                                                                   | 17-18 |
| Interventions        | 11a | Interventions for each group with sufficient detail to allow replication, including how and when they will be administered                                                                                                                                                                                                                                                     | 15-16 |
|                      | 11b | Criteria for discontinuing or modifying allocated interventions for a given trial participant (eg, drug dose change in response to harms, participant request, or improving/worsening disease)                                                                                                                                                                                 | NA    |
|                      | 11c | Strategies to improve adherence to intervention protocols, and any procedures for monitoring adherence (eg, drug tablet return, laboratory tests)                                                                                                                                                                                                                              | 25-26 |
|                      | 11d | Relevant concomitant care and interventions that are permitted or prohibited during the trial                                                                                                                                                                                                                                                                                  | 18    |
| Outcomes             | 12  | Primary, secondary, and other outcomes, including the specific measurement variable (eg, systolic blood pressure), analysis metric (eg, change from baseline, final value, time to event), method of aggregation (eg, median, proportion), and time point for each outcome. Explanation of the clinical relevance of chosen efficacy and harm outcomes is strongly recommended | 19-21 |

|   |                      |    |                                                                                                                                                                                       |               |
|---|----------------------|----|---------------------------------------------------------------------------------------------------------------------------------------------------------------------------------------|---------------|
| 1 | Participant timeline | 13 | Time schedule of enrolment, interventions (including any run-ins and washouts), assessments, and visits for participants. A schematic diagram is highly recommended (see Figure)      | 15 (Figure 2) |
| 2 |                      |    |                                                                                                                                                                                       |               |
| 3 |                      |    |                                                                                                                                                                                       |               |
| 4 | Sample size          | 14 | Estimated number of participants needed to achieve study objectives and how it was determined, including clinical and statistical assumptions supporting any sample size calculations | 26            |
| 5 |                      |    |                                                                                                                                                                                       |               |
| 6 |                      |    |                                                                                                                                                                                       |               |
| 7 | Recruitment          | 15 | Strategies for achieving adequate participant enrolment to reach target sample size                                                                                                   | NA            |
| 8 |                      |    |                                                                                                                                                                                       |               |
| 9 |                      |    |                                                                                                                                                                                       |               |

### 10 **Methods: Assignment of interventions (for controlled trials)**

#### 11 Allocation:

|    |                                  |     |                                                                                                                                                                                                                                                                                                                                                          |       |
|----|----------------------------------|-----|----------------------------------------------------------------------------------------------------------------------------------------------------------------------------------------------------------------------------------------------------------------------------------------------------------------------------------------------------------|-------|
| 12 |                                  |     |                                                                                                                                                                                                                                                                                                                                                          |       |
| 13 |                                  |     |                                                                                                                                                                                                                                                                                                                                                          |       |
| 14 | Sequence generation              | 16a | Method of generating the allocation sequence (eg, computer-generated random numbers), and list of any factors for stratification. To reduce predictability of a random sequence, details of any planned restriction (eg, blocking) should be provided in a separate document that is unavailable to those who enrol participants or assign interventions | 18-19 |
| 15 |                                  |     |                                                                                                                                                                                                                                                                                                                                                          |       |
| 16 |                                  |     |                                                                                                                                                                                                                                                                                                                                                          |       |
| 17 |                                  |     |                                                                                                                                                                                                                                                                                                                                                          |       |
| 18 |                                  |     |                                                                                                                                                                                                                                                                                                                                                          |       |
| 19 | Allocation concealment mechanism | 16b | Mechanism of implementing the allocation sequence (eg, central telephone; sequentially numbered, opaque, sealed envelopes), describing any steps to conceal the sequence until interventions are assigned                                                                                                                                                | 18-19 |
| 20 |                                  |     |                                                                                                                                                                                                                                                                                                                                                          |       |
| 21 |                                  |     |                                                                                                                                                                                                                                                                                                                                                          |       |
| 22 |                                  |     |                                                                                                                                                                                                                                                                                                                                                          |       |
| 23 |                                  |     |                                                                                                                                                                                                                                                                                                                                                          |       |
| 24 | Implementation                   | 16c | Who will generate the allocation sequence, who will enrol participants, and who will assign participants to interventions                                                                                                                                                                                                                                | 19    |
| 25 |                                  |     |                                                                                                                                                                                                                                                                                                                                                          |       |
| 26 |                                  |     |                                                                                                                                                                                                                                                                                                                                                          |       |
| 27 | Blinding (masking)               | 17a | Who will be blinded after assignment to interventions (eg, trial participants, care providers, outcome assessors, data analysts), and how                                                                                                                                                                                                                | 19    |
| 28 |                                  |     |                                                                                                                                                                                                                                                                                                                                                          |       |
| 29 |                                  |     |                                                                                                                                                                                                                                                                                                                                                          |       |
| 30 |                                  | 17b | If blinded, circumstances under which unblinding is permissible, and procedure for revealing a participant's allocated intervention during the trial                                                                                                                                                                                                     | 19    |
| 31 |                                  |     |                                                                                                                                                                                                                                                                                                                                                          |       |
| 32 |                                  |     |                                                                                                                                                                                                                                                                                                                                                          |       |
| 33 |                                  |     |                                                                                                                                                                                                                                                                                                                                                          |       |

### 34 **Methods: Data collection, management, and analysis**

|    |                         |     |                                                                                                                                                                                                                                                                                                                                                                                                              |       |
|----|-------------------------|-----|--------------------------------------------------------------------------------------------------------------------------------------------------------------------------------------------------------------------------------------------------------------------------------------------------------------------------------------------------------------------------------------------------------------|-------|
| 35 |                         |     |                                                                                                                                                                                                                                                                                                                                                                                                              |       |
| 36 | Data collection methods | 18a | Plans for assessment and collection of outcome, baseline, and other trial data, including any related processes to promote data quality (eg, duplicate measurements, training of assessors) and a description of study instruments (eg, questionnaires, laboratory tests) along with their reliability and validity, if known. Reference to where data collection forms can be found, if not in the protocol | 21-24 |
| 37 |                         |     |                                                                                                                                                                                                                                                                                                                                                                                                              |       |
| 38 |                         |     |                                                                                                                                                                                                                                                                                                                                                                                                              |       |
| 39 |                         |     |                                                                                                                                                                                                                                                                                                                                                                                                              |       |
| 40 |                         |     |                                                                                                                                                                                                                                                                                                                                                                                                              |       |
| 41 |                         |     |                                                                                                                                                                                                                                                                                                                                                                                                              |       |
| 42 |                         |     |                                                                                                                                                                                                                                                                                                                                                                                                              |       |

1 18b Plans to promote participant retention and complete follow-up, including list of any outcome data to be 24-25  
2 collected for participants who discontinue or deviate from intervention protocols  
3  
4 Data management 19 Plans for data entry, coding, security, and storage, including any related processes to promote data quality 24-25  
5 (eg, double data entry; range checks for data values). Reference to where details of data management  
6 procedures can be found, if not in the protocol  
7  
8 Statistical methods 20a Statistical methods for analysing primary and secondary outcomes. Reference to where other details of 26-27  
9 the statistical analysis plan can be found, if not in the protocol  
10  
11 20b Methods for any additional analyses (eg, subgroup and adjusted analyses) 26  
12  
13 20c Definition of analysis population relating to protocol non-adherence (eg, as randomised analysis), and any 26  
14 statistical methods to handle missing data (eg, multiple imputation)  
15  
16  
17 **Methods: Monitoring**  
18  
19 Data monitoring 21a Composition of data monitoring committee (DMC); summary of its role and reporting structure; statement 25  
20 of whether it is independent from the sponsor and competing interests; and reference to where further  
21 details about its charter can be found, if not in the protocol. Alternatively, an explanation of why a DMC is  
22 not needed  
23  
24 21b Description of any interim analyses and stopping guidelines, including who will have access to these 25  
25 interim results and make the final decision to terminate the trial  
26  
27 Harms 22 Plans for collecting, assessing, reporting, and managing solicited and spontaneously reported adverse 25  
28 events and other unintended effects of trial interventions or trial conduct  
29  
30 Auditing 23 Frequency and procedures for auditing trial conduct, if any, and whether the process will be independent 26  
31 from investigators and the sponsor  
32  
33  
34 **Ethics and dissemination**  
35  
36 Research ethics 24 Plans for seeking research ethics committee/institutional review board (REC/IRB) approval 27-28  
37 approval  
38  
39  
40  
41  
42

|    |                     |     |                                                                                                                 |          |
|----|---------------------|-----|-----------------------------------------------------------------------------------------------------------------|----------|
| 1  | Protocol            | 25  | Plans for communicating important protocol modifications (eg, changes to eligibility criteria, outcomes,        | 27-28    |
| 2  | amendments          |     | analyses) to relevant parties (eg, investigators, REC/IRBs, trial participants, trial registries, journals,     |          |
| 3  |                     |     | regulators)                                                                                                     |          |
| 4  |                     |     |                                                                                                                 |          |
| 5  | Consent or assent   | 26a | Who will obtain informed consent or assent from potential trial participants or authorised surrogates, and      | 27-28    |
| 6  |                     |     | how (see Item 32)                                                                                               |          |
| 7  |                     |     |                                                                                                                 |          |
| 8  |                     | 26b | Additional consent provisions for collection and use of participant data and biological specimens in            | NA       |
| 9  |                     |     | ancillary studies, if applicable                                                                                |          |
| 10 |                     |     |                                                                                                                 |          |
| 11 | Confidentiality     | 27  | How personal information about potential and enrolled participants will be collected, shared, and               | 28       |
| 12 |                     |     | maintained in order to protect confidentiality before, during, and after the trial                              |          |
| 13 |                     |     |                                                                                                                 |          |
| 14 |                     |     |                                                                                                                 |          |
| 15 | Declaration of      | 28  | Financial and other competing interests for principal investigators for the overall trial and each study site   | 29       |
| 16 | interests           |     |                                                                                                                 |          |
| 17 |                     |     |                                                                                                                 |          |
| 18 | Access to data      | 29  | Statement of who will have access to the final trial dataset, and disclosure of contractual agreements that     | 28       |
| 19 |                     |     | limit such access for investigators                                                                             |          |
| 20 |                     |     |                                                                                                                 |          |
| 21 | Ancillary and post- | 30  | Provisions, if any, for ancillary and post-trial care, and for compensation to those who suffer harm from trial | NA       |
| 22 | trial care          |     | participation                                                                                                   |          |
| 23 |                     |     |                                                                                                                 |          |
| 24 | Dissemination       | 31a | Plans for investigators and sponsor to communicate trial results to participants, healthcare professionals,     | 28       |
| 25 | policy              |     | the public, and other relevant groups (eg, via publication, reporting in results databases, or other data       |          |
| 26 |                     |     | sharing arrangements), including any publication restrictions                                                   |          |
| 27 |                     |     |                                                                                                                 |          |
| 28 |                     | 31b | Authorship eligibility guidelines and any intended use of professional writers                                  | 28       |
| 29 |                     |     |                                                                                                                 |          |
| 30 |                     | 31c | Plans, if any, for granting public access to the full protocol, participant-level dataset, and statistical code | NA       |
| 31 |                     |     |                                                                                                                 |          |
| 32 |                     |     |                                                                                                                 |          |
| 33 | <b>Appendices</b>   |     |                                                                                                                 |          |
| 34 |                     |     |                                                                                                                 |          |
| 35 | Informed consent    | 32  | Model consent form and other related documentation given to participants and authorised surrogates              | Appendix |
| 36 | materials           |     |                                                                                                                 |          |
| 37 |                     |     |                                                                                                                 |          |
| 38 | Biological          | 33  | Plans for collection, laboratory evaluation, and storage of biological specimens for genetic or molecular       | NA       |
| 39 | specimens           |     | analysis in the current trial and for future use in ancillary studies, if applicable                            |          |
| 40 |                     |     |                                                                                                                 |          |
| 41 |                     |     |                                                                                                                 |          |

1  
2  
3  
4  
5  
6  
7  
8  
9  
10  
11  
12  
13  
14  
15  
16  
17  
18  
19  
20  
21  
22  
23  
24  
25  
26  
27  
28  
29  
30  
31  
32  
33  
34  
35  
36  
37  
38  
39  
40  
41  
42  
43  
44  
45  
46

\*It is strongly recommended that this checklist be read in conjunction with the SPIRIT 2013 Explanation & Elaboration for important clarification on the items. Amendments to the protocol should be tracked and dated. The SPIRIT checklist is copyrighted by the SPIRIT Group under the Creative Commons [“Attribution-NonCommercial-NoDerivs 3.0 Unported”](#) license.

For peer review only



**Supplementary File 2. Research ethics committees of the TELESCOPE trial.**

| Centre      | HOSPITAL (Brazilian estate)                                       | RESEARCH ETHICS COMMITTEE                                                                               | APPROVAL NUMBER           |
|-------------|-------------------------------------------------------------------|---------------------------------------------------------------------------------------------------------|---------------------------|
| Coordinator | Hospital Albert Einstein (SP)                                     | Hospita Israelita Albert Einstein HIAE                                                                  | CAAE 01523118.0.1001.0071 |
| Centre 1    | Hospital Universitário da Universidade Federal de Sergipe (SE)    | Universidade Federal de Sergipe UFS                                                                     | CAAE 01523118.0.2005.5546 |
| Centre 2    | Hospital Municipal Senhora Santana (Hospital Microrregional) (MG) | Faculdade de Talentos Humanos - FACTHUS                                                                 | CAAE 01523118.0.2001.9028 |
| Centre 3    | Santa Casa de Paranavaí (PR)                                      | Universidade Estadual do Parana UNESPAR                                                                 | CAAE 01523118.0.2025.9247 |
| Centre 4    | Hospital de Caridade de Irati (PR)                                | Universidade Estadual do Centro Oeste - Campus de Irati - UNICENTRO                                     | CAAE 01523118.0.2015.8967 |
| Centre 5    | Hospital Regional de Gurupi (TO)                                  | Centro Universitario UNIRG                                                                              | CAAE 01523118.0.2026.5518 |
| Centre 6    | Hospital Nossa Senhora da Oliveira – HNSO (RS)                    | Comitê de Ética em Pesquisa do Hospital Nossa Senhora de Pompéia                                        | CAAE 01523118.0.2023.5331 |
| Centre 7    | Hospital de Trauma Dom Luiz Gonzaga Fernandes (PB)                | Secretaria de Saude do Estado da Paraíba                                                                | CAAE 01523118.0.2033.5186 |
| Centre 8    | Hospital Regional de Assis (SP)                                   | Hospital Regional do Câncer de Presidente Prudente HRCPP                                                | CAAE 01523118.0.2012.8247 |
| Centre 9    | Hospital Municipal de Paracatu (MG)                               | Faculdade de Ciências e Educação Sena Aires                                                             | CAAE 01523118.0.2010.5595 |
| Centre 10   | Hospital Regional Dr. Clodolfo Rodrigues de Melo (AL)             | Universidade Federal de Alagoas                                                                         | CAAE 01523118.0.2029.5013 |
| Centre 11   | Hospital Municipal Rocha Faria (RJ)                               | Secretaria Municipal de Saúde do Rio de Janeiro - SMS/RJ                                                | CAAE 01523118.0.2021.5279 |
| Centre 12   | Hospital Universitario Nova Esperança (PB)                        | Escola de Enfermagem Nova Esperança LTDA                                                                | CAAE 01523118.0.2013.5179 |
| Centre 13   | Santa Casa de Itapetininga (SP)                                   | Faculdade de Ciências Médicas e da Saúde da Pontifícia Universidade Católica de São Paulo - FCMS-PUC/SP | CAAE 1523118.0.2038.5373  |
| Centre 14   | Casa de Caridade de Muriaé - Hospital São Paulo (MG)              | Hospital Santa Paula - SP                                                                               | CAAE 01523118.0.2036.5670 |
| Centre 15   | Santa Casa de Misericórdia de Votuporanga (SP)                    | CEP UNIFEV                                                                                              | CAAE 01523118.0.2006.0078 |
| Centre 16   | Irmandade da Santa Casa de Sorocaba (SP)                          | Universidade de Sorocaba UNISO                                                                          | CAAE 01523118.0.2022.5500 |
| Centre 17   | Santa Casa de Misericórdia de Belo Horizonte (MG)                 | Santa Casa de Misericórdia de Belo Horizonte - SCMBH                                                    | CAAE 01523118.0.2008.5138 |
| Centre 18   | Hospital da Restauração - Secretaria Estadual de Saúde (PE)       | Hospital da Restauração - PE CEP/HUOC/PROCAPE                                                           | CAAE 01523118.0.2004.5198 |
| Centre 19   | Hospital Geral de Roraima (RR)                                    | Universidade Federal de Roraima - UFRR                                                                  | CAAE 01523118.0.2011.5302 |
| Centre 20   | Hospital Geral de Vitória da Conquista (BA)                       | Secretaria da Saude do Estado da Bahia - SESAB                                                          | CAAE 01523118.0.2009.0052 |
| Centre 21   | Hospital Regional Justino Luz (PI)                                | Hospital Universitário da Universidade Federal do Piauí UFPI                                            | CAAE 01523118.0.2030.8050 |

|           |                                                                                   |                                                                            |                           |
|-----------|-----------------------------------------------------------------------------------|----------------------------------------------------------------------------|---------------------------|
| Centre 22 | Complexo Hospitalar Mangabeira Governador Tarcísio Burity (PB)                    | UFPB - Centro de Ciências da Saúde da Universidade Federal da Paraíba UFPB | CAAE 01523118.0.2003.5188 |
| Centre 23 | Hospital Regional de Barbacena Dr. José Américo (MG)                              | Fundação Hospitalar do Estado de Minas Gerais FHEMIG                       | CAAE 01523118.0.2024.5119 |
| Centre 24 | Hospital Geral de Promissão Prefeito Miguel Martin Gualda (SP)                    | Hospital Regional do Câncer de Presidente Prudente HRCPP                   | CAAE 01523118.0.2037.8247 |
| Centre 25 | Hospital Maternidade e Pronto Socorro Santa Lúcia LTDA (MG)                       | Hospital Vera Cruz HVC/ MG                                                 | CAAE 01523118.0.2002.5135 |
| Centre 26 | Hospital Municipal Padre Germano Lauck - Hospital Municipal de Foz do Iguaçu (PR) | Centro Universitário Dinâmica das Cataratas UDC                            | CAAE 01523118.0.2007.8527 |
| Centre 27 | Santa Casa de Anápolis (GO)                                                       | UEG - Universidade Estadual de Goiás                                       | CAAE 01523118.0.2031.8113 |
| Centre 28 | Santa Casa de Misericórdia de Passos (MG)                                         | Santa Casa de Misericórdia de Passos SCMP                                  | CAAE 01523118.0.2014.8043 |
| Centre 29 | Hospital Geral e Maternidade Tereza Ramos (SC)                                    | Secretaria de Estado da Saúde de Santa Catarina/SES                        | CAAE 01523118.0.2016.0115 |
| Centre 30 | Hospital Regional do Paranoá (DF)                                                 | Comitê de Ética em Pesquisa FEPECS/SES-DF                                  | CAAE 01523118.0.2019.5553 |

# BMJ Open

## TELE-critical care verSus usual Care On ICU Performance (TELESCOPE): protocol for a cluster-randomised clinical trial on adult general ICUs in Brazil

|                                 |                                                                                                                                                                                                                                                                                                                                                                                                                                                                                                                                                                                                                                                                                                                                                                                                                                                                                                                                                                                                                                                                                                                                                                                                                                                                                                                                                                                                                                                                                                                                                                                                                                 |
|---------------------------------|---------------------------------------------------------------------------------------------------------------------------------------------------------------------------------------------------------------------------------------------------------------------------------------------------------------------------------------------------------------------------------------------------------------------------------------------------------------------------------------------------------------------------------------------------------------------------------------------------------------------------------------------------------------------------------------------------------------------------------------------------------------------------------------------------------------------------------------------------------------------------------------------------------------------------------------------------------------------------------------------------------------------------------------------------------------------------------------------------------------------------------------------------------------------------------------------------------------------------------------------------------------------------------------------------------------------------------------------------------------------------------------------------------------------------------------------------------------------------------------------------------------------------------------------------------------------------------------------------------------------------------|
| Journal:                        | <i>BMJ Open</i>                                                                                                                                                                                                                                                                                                                                                                                                                                                                                                                                                                                                                                                                                                                                                                                                                                                                                                                                                                                                                                                                                                                                                                                                                                                                                                                                                                                                                                                                                                                                                                                                                 |
| Manuscript ID                   | bmjopen-2020-042302.R2                                                                                                                                                                                                                                                                                                                                                                                                                                                                                                                                                                                                                                                                                                                                                                                                                                                                                                                                                                                                                                                                                                                                                                                                                                                                                                                                                                                                                                                                                                                                                                                                          |
| Article Type:                   | Protocol                                                                                                                                                                                                                                                                                                                                                                                                                                                                                                                                                                                                                                                                                                                                                                                                                                                                                                                                                                                                                                                                                                                                                                                                                                                                                                                                                                                                                                                                                                                                                                                                                        |
| Date Submitted by the Author:   | 30-Mar-2021                                                                                                                                                                                                                                                                                                                                                                                                                                                                                                                                                                                                                                                                                                                                                                                                                                                                                                                                                                                                                                                                                                                                                                                                                                                                                                                                                                                                                                                                                                                                                                                                                     |
| Complete List of Authors:       | Noritomi, Danilo; Hospital Israelita Albert Einstein, Critical Care; Rede Impar, Práticas Clínicas<br>Ranzani, Otavio; Universidade de Sao Paulo Faculdade de Medicina Hospital das Clinicas, Pulmonary Division, Heart Institute, Hospital das Clinicas, University of Sao Paulo, Sao Paulo, Brazil; Barcelona Institute for Global Health, ISGlobal<br>Ferraz, Leonardo; Hospital Israelita Albert Einstein, Critical Care dos Santos, Maura<br>Cordioli, Eduardo; Hospital Israelita Albert Einstein, Critical Care Albaladejo, Renata; Hospital Israelita Albert Einstein, Critical Care Serpa Neto, Ary; Hospital Israelita Albert Einstein, Critical Care; BRICNET<br>Correa, Thiago; ICU, Hospital Israelita Albert Einstein, São Paulo, Brazil; BRICNET<br>Berwanger, Otávio; Hospital Israelita Albert Einstein de Morais, Lúbia; Hospital Israelita Albert Einstein, Critical Care Schettino, Guilherme; Hospital Israelita Albert Einstein, Critical Care Cavalcanti, Alexandre ; HCor Research Institute; BRICNET<br>Rosa, Regis Goulart; H MV, Intensive Care; BRICNET<br>Biondi, Rodrigo; Instituto de Cardiologia do Distrito Federal; Hospital Brasília<br>Salluh, Jorge; Department of Critical Care and Graduate Program in Translational Medicine, D'Or Institute for Research and Education, Rio de Janeiro, Brazil; BRICNET<br>Azevedo, Luciano Cesar; Hospital Sírio-Libanês, Intensive Care Unit; University of Sao Paulo, Emergency Medicine Department<br>Pereira, Adriano; Hospital Israelita Albert Einstein, Critical Care; Universidade Federal de Lavras, Postgraduate Program of Health Sciences |
| <b>Primary Subject Heading</b>: | Intensive care                                                                                                                                                                                                                                                                                                                                                                                                                                                                                                                                                                                                                                                                                                                                                                                                                                                                                                                                                                                                                                                                                                                                                                                                                                                                                                                                                                                                                                                                                                                                                                                                                  |
| Secondary Subject Heading:      | Health services research                                                                                                                                                                                                                                                                                                                                                                                                                                                                                                                                                                                                                                                                                                                                                                                                                                                                                                                                                                                                                                                                                                                                                                                                                                                                                                                                                                                                                                                                                                                                                                                                        |
| Keywords:                       | Telemedicine < BIOTECHNOLOGY & BIOINFORMATICS, Quality in health care < HEALTH SERVICES ADMINISTRATION & MANAGEMENT, INTENSIVE & CRITICAL CARE                                                                                                                                                                                                                                                                                                                                                                                                                                                                                                                                                                                                                                                                                                                                                                                                                                                                                                                                                                                                                                                                                                                                                                                                                                                                                                                                                                                                                                                                                  |

1  
2  
3  
4  
5  
6  
7  
8  
9  
10  
11  
12  
13  
14  
15  
16  
17  
18  
19  
20  
21  
22  
23  
24  
25  
26  
27  
28  
29  
30  
31  
32  
33  
34  
35  
36  
37  
38  
39  
40  
41  
42  
43  
44  
45  
46  
47  
48  
49  
50  
51  
52  
53  
54  
55  
56  
57  
58  
59  
60

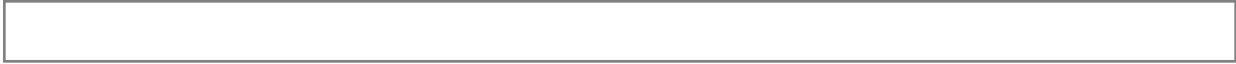

SCHOLARONE™  
Manuscripts

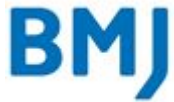

I, the Submitting Author has the right to grant and does grant on behalf of all authors of the Work (as defined in the below author licence), an exclusive licence and/or a non-exclusive licence for contributions from authors who are: i) UK Crown employees; ii) where BMJ has agreed a CC-BY licence shall apply, and/or iii) in accordance with the terms applicable for US Federal Government officers or employees acting as part of their official duties; on a worldwide, perpetual, irrevocable, royalty-free basis to BMJ Publishing Group Ltd ("BMJ") its licensees and where the relevant Journal is co-owned by BMJ to the co-owners of the Journal, to publish the Work in this journal and any other BMJ products and to exploit all rights, as set out in our [licence](#).

The Submitting Author accepts and understands that any supply made under these terms is made by BMJ to the Submitting Author unless you are acting as an employee on behalf of your employer or a postgraduate student of an affiliated institution which is paying any applicable article publishing charge ("APC") for Open Access articles. Where the Submitting Author wishes to make the Work available on an Open Access basis (and intends to pay the relevant APC), the terms of reuse of such Open Access shall be governed by a Creative Commons licence – details of these licences and which [Creative Commons](#) licence will apply to this Work are set out in our licence referred to above.

Other than as permitted in any relevant BMJ Author's Self Archiving Policies, I confirm this Work has not been accepted for publication elsewhere, is not being considered for publication elsewhere and does not duplicate material already published. I confirm all authors consent to publication of this Work and authorise the granting of this licence.

## TITLE PAGE:

**TELE-critical care verSus usual Care On ICU PErformance (TELESCOPE): protocol for a cluster-randomised clinical trial on adult general ICUs in Brazil**

Danilo Teixeira Noritomi<sup>1,2,3\*</sup>; Otavio T. Ranzani<sup>4,5\*</sup>; Leonardo Jose Rolim Ferraz<sup>1</sup>; Maura Cristina dos Santos<sup>1</sup>; Eduardo Cordioli<sup>1</sup>, Renata Albaladejo<sup>1</sup>; Ary Serpa Neto<sup>1,6</sup>; Thiago Domingos Corrêa<sup>1,6</sup>; Otávio Berwanger<sup>1</sup>, Lúbia Caus de Moraes<sup>1</sup>; Guilherme Schettino<sup>1</sup>, Alexandre Biasi Cavalcanti<sup>6,7</sup>, Regis Goulart Rosa<sup>6,9</sup>, Rodrigo Santos Biondi<sup>8</sup>, Jorge Salluh<sup>6,10</sup>, Luciano Azevedo<sup>6,11,12</sup>, Adriano José Pereira<sup>1,2,13,14</sup>, On behalf of the TELESCOPE Trial Investigators

1. Tele-ICU Department, Hospital Israelita Albert Einstein, São Paulo, SP, Brazil.
2. Department of Critical Care Medicine, Hospital Israelita Albert Einstein, São Paulo, SP, Brazil
3. Quality and Patient Safety Department, Rede Ímpar, São Paulo, SP, Brazil
4. Pulmonary Division, Heart Institute (InCor), Hospital das Clinicas HCFMUSP, Faculdade de Medicina, Universidade de Sao Paulo, São Paulo, Brazil.
5. Barcelona Institute for Global Health, ISGlobal, Barcelona, Spain
6. Brazilian Research in Intensive Care Network (BRICNet)
7. HCor Research Institute, São Paulo, Brazil.
8. Instituto de Cardiologia do Distrito Federal e Hospital Brasília, Rede Ímpar, Brasília (DF), Brasil.
9. Critical Care Department, Hospital Moinhos de Vento, Porto Alegre, RS, Brazil
10. D'or Institute for Research and Education, Rio De Janeiro, Brazil.
11. University of Sao Paulo, Emergency Medicine Department, Sao Paulo, Sao Paulo, Brazil.
12. Hospital Sirio-Libanês, Instituto Sirio-Libanês de Ensino e Pesquisa, Sao Paulo, Sao Paulo, Brazil.
13. Hospital Municipal da Vila Santa Catarina, São Paulo, SP, Brazil.
14. Postgraduate Program of Health Sciences, Universidade Federal de Lavras/MG – Brazil.

\* DTN and OTR contributed equally to this paper.

**Research registry:** NCT03920501

**Version:** 3.0 – December 2020

**Funding:** PROADI – Institutional Development Program of the Unified Health System (n° 25000.018804/2018-23). Secretaria de Ciência, Tecnologia, Inovação e Insumos Estratégicos. Brazilian Ministry of Health. [diego.diniz@saude.gov.br](mailto:diego.diniz@saude.gov.br).

**Contributors:** DTN, OTR and AJP developed the main study intervention. DTN, OTR and AJP developed the original concept of this study. DTN, OTR, MS, ASN, TDC, RA, LC, ABC, RB, RGR, JS, LA, GS, OB, EC, LRF and AJP contributed to study design. DTN, OTR, MS, ASN and AJP wrote the first draft of the paper, and TDC, RA, LC, ABC, RB, RGR, JS, LA, GS, OB, EC and LRF revised the first draft. The final manuscript was reviewed by all the authors. All authors read and approved the final manuscript.

1  
2  
3 **Corresponding author:** Danilo Teixeira Noritomi  
4

5 Intensive Care Unit, Hospital Israelita Albert Einstein, São Paulo, SP.  
6

7 **E-mail:** dnoritomi@hotmail.com  
8  
9

10 **Word count:** 4317  
11  
12  
13  
14  
15  
16  
17  
18  
19  
20  
21  
22  
23  
24  
25  
26  
27  
28  
29  
30  
31  
32  
33  
34  
35  
36  
37  
38  
39  
40  
41  
42  
43  
44  
45  
46  
47  
48  
49  
50  
51  
52  
53  
54  
55  
56  
57  
58  
59  
60

For peer review only

## FUNDING/SPONSOR

The Ministry of Health (Institutional Development Program of the Unified Health System – PROADI SUS) was the primary source of funding, including costs of physician services, purchase of equipment (hardware) for Telemedicine sessions, hiring of local professionals for data collection, and travel expenses for training and monitoring. The same funding also covered costs related to the regulatory part of the study – data collection, monitoring, data curation and statistical support. The Hospital Israelita Albert Einstein allocated time of professionals and specialists who sat on the Trial Management Committee (TMC) of the study, as well as assign its Telemedicine service system. The sponsor had no role regarding design; collection, management, analysis, and interpretation of data; writing of the report; and the decision to submit the report for publication.



## COMPOSITION, ROLES AND RESPONSIBILITIES

**Coordinating Center:** Hospital Israelita Albert Einstein (HIAE)

**Executive Committee** (Design and execution of the study, protocol preparation and revisions, preparation of the investigator's brochure (IB) and case reform forms (CRF), organization of the meetings of the committee of representatives of the ICUs participating in the study, oversight of the clinical trials office (ARO) management activities, publishing of study reports):

- Adriano José Pereira – intensivist. Intensive Care Unit, Hospital Israelita Albert Einstein  
- **Principal Investigator/Study Chair.**
- Danilo Teixeira Noritomi - intensivist. Hospital Israelita Albert Einstein, São Paulo, SP.  
**Senior Investigator.**
- Otavio Tavares Ranzani – intensivist and epidemiologist
- Maura Santos - Senior Nurse

**Steering Committee:**

- Adriano José Pereira – intensivist. Intensive Care Unit, Hospital Israelita Albert Einstein  
- **Principal Investigator/Study Chair.**
- Alexandre Biasi Cavalcanti – intensivist. Research Institute HCor, São Paulo, SP.  
Member of BRICNet – Brazilian Research in Intensive Care Network
- Ary Serpa Neto – intensivist. Hospital Alemão Oswaldo Cruz, São Paulo, SP. Member  
of BRICNet – Brazilian Research in Intensive Care Network
- Danilo Teixeira Noritomi - intensivist. Hospital Israelita Albert Einstein, São Paulo, SP.  
**Senior Investigator.**
- Eduardo Cordioli. Health Care Manager of the Department of Telemedicine of the  
Hospital Israelita Albert Einstein, São Paulo, SP
- Fernando Gatti. Coordinator of the Hospital Infection Control Service of the Hospital  
Israelita Albert Einstein, São Paulo, SP – 10
- Jorge Salluh. Intensivist. Professor in the UFRJ Graduate Program, Researcher of the  
Intensive Care Department, IDOR- Rio de Janeiro

- 1  
2  
3 – Leonardo José Rolin Ferraz – intensivist. Intensive Care Unit, Hospital Israelita Albert  
4 Einstein  
5  
6  
7  
8 – Lúbia Caus. Intensivist. Intensive Care Unit, Hospital Israelita Albert Einstein.  
9  
10  
11 – Luciano Azevedo – intensivist. Hospital Sírio-Libanês & Hospital São Paulo, UNIFESP,  
12 São Paulo, SP. Member of BRICNet – Brazilian Research in Intensive Care Network  
13  
14  
15 – Maura Cristina Santos. Senior nurse of the Department of Severely ill Patients, tele –  
16 ICU. Study Manager  
17  
18  
19 – Otávio Berwanger – epidemiologist. Hospital Israelita Albert Einstein, São Paulo, SP  
20  
21  
22 – Otavio Tavares Ranzani – intensivist and epidemiologist  
23  
24  
25 – Regis Goulart Rosa – intensivist. Adult Intensive Care Unit of the Hospital Moinhos de  
26 Vento, Porto Alegre, RS  
27  
28  
29 – Renata Albaladejo. Nurse specialist in Telemedicine  
30  
31  
32 – Rodrigo Biondi – intensive care physician  
33  
34  
35 – Thiago Domingos Correa – intensivist. Hospital Israelita Albert Einstein, São Paulo, SP.  
36 Member of BRICNet – Brazilian Research in Intensive Care Network  
37  
38

### ***Project Office***

- 39  
40 – Composed by Main Researcher, Senior Researcher and Study Manager  
41  
42  
43 – Responsible for the trial planning  
44  
45  
46 – Responsible for organizing meetings with the representative committee of the ICUs  
47 participating in the trial  
48  
49  
50 – Responsible for producing semiannual progress reports for the Ministry of Health and  
51 the Ethics Committee  
52  
53  
54  
55 – Responsible for the trial master file  
56  
57  
58 – Responsible for managing the trial financial resources (in partnership with the PROADI  
59 institutional office) and contractual issues with third parties and individual centers  
60

- Responsible for making recommendations for local investigators
- Responsible for semi-annual monitoring (in partnership with ARO), providing feedbacks and decisions on visits to the centers
- Responsible for data checking
- Responsible for randomization

#### ***Representative Committee of ICUs participating in the trial***

- Ensure implementation of interventions at the center
- Ensure data collection quality
- Monitor trial and, if necessary, approve protocol changes or amendments/IB, ensuring the trial is conducted as efficiently as possible.

#### ***Local Investigators***

- A local investigator will be appointed in each center (ICU coordinator or senior doctor at the ICU). He will oversee hired data collectors. In intervention on the ICUs, they will be responsible for ensuring the implementation of intervention proposed by a remote intensivist (Telemedicine), data collection / feeding, filling in the CRF (Case Report Form) and patient follow-up.

#### ***Data manager***

- Responsible (together with Einstein's technical Telemedicine team) for maintaining patient care system, data feeding and verification.
- Responsible to execute the Data Monitoring Plan.

#### ***Sponsor (Brazil Ministry of Health)***

- Approval of detailed study proposal, according to public interest
- Project schedule development follow-up (quarterly face-to-face or virtual meetings; annual written report)
- Pre-publication consent (according to current legislation)
- No participation or interference in the analyses and results.

**ABSTRACT** (word count: 297/300)

**Introduction** – Daily multidisciplinary rounds (DMRs) consists of systematic patient-centred discussions aiming to establish joint therapeutic goals for the next 24 hours of ICU care. The aim of the present study protocol is to evaluate whether an intervention consisting of guided DMRs, supported by a remote specialist and audit / feedback on care performance will reduce ICU length of stay compared to a control group.

**Methods and analysis** - A multicentre, controlled, cluster-randomised superiority trial including 30 ICUs in Brazil (15 intervention and 15 control), from August 2019 to June 2021. In a parallel assignment, ICUs are randomised to a complex-intervention composed by daily rounds carried out through Tele-ICU by a remote ICU physician; development of local quality indicators dashboards coupled with monthly meetings with local leadership; and dissemination of evidence-based clinical protocols *versus* usual care. Primary outcome is ICU length of stay. Secondary outcomes include classification of the unit according to the profiles defined by the standardized resource use and the standardized mortality rate, hospital mortality, incidence of healthcare-associated infections, ventilator-free days at 28 days, patient-days receiving oral or enteral feeding, patient-days under light sedation or alert and calm, rate of patients under normoxaemia. All adult patients admitted after the beginning of the study in each participant ICU will be enrolled. Inclusion criteria (clusters): public Brazilian ICUs with a minimum of 8 ICU beds interested/committed to participating in the study. Exclusion criteria (clusters): units with fully established daily multidisciplinary rounds by an intensivist, specialized or step-down units.

**Ethics and dissemination** - The study protocol was approved by the IRB of the coordinator centre, and by IRBs of each enrolled hospital/ICU. Statistical Analysis Protocol is being prepared for submission before the end of patient's enrolment. Results will be disseminated through conferences, peer-reviewed journals and to each participating unit.

**Keywords:** Telemedicine, Tele-ICU, Quality Improvement, Intensive Care.

**ARTICLE SUMMARY:**

**Strengths and limitations of this study** (Up to five short bullet points, no longer than one sentence each, that relate specifically to the methods)

- TELESCOPE is the first, large, multicentre cluster randomised trial performed in a middle-income country evaluating if a complex-intervention delivered mainly by TELE-ICU physician and aiming to optimize the care of critically ill patients impacts clinical outcomes.
- TELESCOPE trained general board-certified ICU physicians to deliver TELE-ICU consultancy and provide performance feedback to the attending team and managers.
- TELESCOPE used a baseline period as reference for randomisation, by using a minimization algorithm in order to achieve balance between arms and decrease within cluster variability.
- TELESCOPE intervention occurs only inside the ICU and an expected limitation is that length-of-stay depends on factors outside the ICU, such as ward bed availability.

## INTRODUCTION

Healthcare demand for critically ill patients admitted to Intensive Care Units (ICUs) has been expanding worldwide, causing great social impact.<sup>1-3</sup> Several factors have contributed to it, such as population ageing,<sup>4</sup> a higher prevalence of chronic diseases, among others.<sup>3 5</sup> Brazil is especially sensitive to this issue as it experiences great regional disparities and population ageing without adequate control of the main health determinants.<sup>6-9</sup> Such situation has resulted in a large number of frail elderly, who often require critical care due to acute aggravations in chronic conditions.<sup>10-12</sup> This scenario combined with the risk of spending a significant amount of money with suboptimal return for the society, justifies seeking efficient care for severely ill patients.<sup>13</sup>

Daily multidisciplinary round (DMR) is an approach that optimizes the ICU care<sup>14-16</sup> DMRs consists of systematic patient-centred discussions aiming to establish joint therapeutic goals for the next 24 hours of ICU care.<sup>14</sup> In different studies, DMR has been associated to better clinical outcomes.<sup>15 16</sup> However, full implementation of DMR is still challenging, since DMR must contain several attributes in order to maximize its results: its multidisciplinary character; proper settings; time and team standardizations; definition of roles; use of guiding tools; reduction of interruptions and focus on documented objectives.<sup>14</sup>

Telecommunication use for health care practice, the prototype for what telemedicine has become, has been described since the advent of telecommunication.<sup>17</sup> The availability of high-speed data traffic has expanded the boundaries of Telemedicine, allowing the emergence of the first trial with critically ill patients in 1977.<sup>18</sup> In recent years, the use of Telemedicine in critically ill patients, known as tele-ICU, has gained relevance.<sup>19</sup> Specifically in the US, the number of ICU beds with some form of Telemedicine coverage has reached at

1  
2  
3 least 15%.<sup>20 21</sup> There is a variety of possible tele-ICU applications, such as second opinion  
4  
5 consultations in specific cases, monitoring of vital signs, real-time performance and DMR  
6  
7 conducted by a remotely located medical specialist.<sup>22 23</sup> . However, the benefit of tele-ICU  
8  
9 lacks high quality scientific evidence, particularly outside high-income countries.<sup>24 25</sup>  
10  
11 Furthermore, most of the studies published so far address Telemedicine in ICUs using vital  
12  
13 signs monitoring and a continuous response system in a costly way.<sup>26</sup> Thus, little is known  
14  
15 about the use of Telemedicine focused primarily on supporting DMR, which is understood to  
16  
17 be both effective and more feasible from the economic perspective.  
18  
19  
20  
21  
22  
23  
24  
25

## 26 **METHODS AND ANALYSIS**

### 27 ***Aim and objectives***

28  
29 The TELESCOPE trial aims to answer to the following research question: Does a complex  
30  
31 intervention offered by tele-ICU, focused on DMR attended by remote intensivists, improve  
32  
33 ICU efficiency of adult general units in Brazil?  
34  
35  
36  
37  
38  
39

#### 40 *Primary Goal*

- 41  
42  
43 - To evaluate whether an intervention consisting of guided DMRs, supported by a  
44  
45 remote specialist (intensivist) through Telemedicine and audit / feedback on care  
46  
47 performance will reduce ICU length of stay compared to a control group.  
48

#### 49 *Secondary goals*

- 50  
51  
52 - To evaluate whether an intervention consisting of guided DMRs, supported by a  
53  
54 remote specialist (intensivist) through Telemedicine and audit / feedback on care  
55  
56 performance improves indicators of ICU performance compared to a control group.  
57  
58  
59  
60

### ***Study design and setting***

1  
2  
3 The TELESCOPE trial is a national, multi-centre, controlled, open label, cluster  
4 randomised trial. The study tests the effectiveness of daily multidisciplinary rounds  
5 conducted by an intensivist through Telemedicine in Brazilian ICUs. Approximately 15,000  
6 patients are expected to be recruited for a period of 18 months in 30 Brazilian ICUs (Figure  
7 1). The main characteristics of the TELESCOPE trial, according to World Health Organization  
8 standards, are summarized in the Synopsis table (table 1). The three versions of the protocol  
9 are listed in the project control version table (table 2).

10  
11  
12  
13  
14  
15  
16  
17  
18  
19  
20 After a 2-month observation period (baseline period) in which performance indicators  
21 for eligible ICUs is collected without any intervention (with the purpose of obtaining data for  
22 randomisation and characterization of the initial ICU status), the ICUs eligible for the study  
23 are randomised to either receive DMRs conducted by an intensivist through Telemedicine,  
24 from Monday to Friday, in addition to a monthly discussion of care performance indicators  
25 performed through virtual meetings (Intervention Group), or receive the unit's usual care  
26 (Control Group) (Figure 2). ICU board certified physicians receives a multicomponent training  
27 before starting the tele-ICU DMR, comprising empathy and communication and quality  
28 improvement (Figure 3). The study protocol was registered in the Clinicaltrials.Gov  
29 (NCT03920501). The study protocol follows the recommendations of the SPIRIT 2013  
30 Statement (supplementary file 1).<sup>27</sup>

### 31 32 33 34 35 36 37 38 39 40 41 42 43 44 45 46 47 48 49 **Intervention**

#### 50 51 52 *Intervention group (Tele-ICU) (Table 3)*

53  
54 Trial intervention consists of:

- 55  
56  
57 1. *Daily multidisciplinary rounds (DMR) led by remote intensivists* - Discussions are  
58  
59 conducted by an intensivist located in a remote centre (tele-intensivist) and the local  
60



1  
2  
3 multidisciplinary team (doctor, nurse and physiotherapist). DMRs takes place from  
4  
5 Monday to Friday, in predetermined hours (mostly during the mornings), using  
6  
7 Telemedicine equipment, and approach every patient admitted to the participating  
8  
9 ICUs. The main objective of DMR conducted by a tele-intensivist is to discuss  
10  
11 diagnostic hypotheses, active problems and create a treatment plan until the next  
12  
13 DMR. Tele-intensivists make recommendations based on updated scientific evidence,  
14  
15 suitable to the local context. Clinical protocols in texts and videos formats (developed  
16  
17 and used during the tele-intensivists training period) were made available to  
18  
19 physicians and multidisciplinary team of the ICUs in the intervention arm, right after  
20  
21 randomisation and establishment of a DMR routine. Electronic forms for patient  
22  
23 follow-up serves as a guideline (Index) and are filled out by tele-intensivists. According  
24  
25 to the current regulation (national resolution from the Brazilian Federal Council of  
26  
27 Medicine, CFM Resolution 1643 of 2002), tele-intensivists does not act directly upon  
28  
29 patients, but are rather mediated by the local team. Therefore, the local healthcare  
30  
31 practitioners implement the treatment plan. Indicators of adherence to  
32  
33 recommendations made by tele-intensivists are registered. Tele-intensivists do not  
34  
35 write medical prescriptions, nor gives direct orders to the local care team for  
36  
37 procedures or interventions. DMRs may be postponed, interrupted or suspended in  
38  
39 case of urgency / medical emergency situations that may hinder participation of local  
40  
41 doctors.  
42  
43  
44  
45  
46  
47  
48  
49  
50  
51  
52  
53

- 54 2. *Management of ICU performance* - The variables collected for the trial (table 1) are  
55 presented aggregately in reports available for each coordinator of the participating  
56  
57 ICUs as well as for tele-intensivists. Data from Case Report Forms - CRFs (REDCap®,  
58  
59  
60

1  
2  
3 Vanderbilt University Medical Center, TN, USA) are used to automatically feed  
4  
5 dashboards in real-time, specially developed for this purpose (R Studio/Shiny®,  
6  
7 Boston, MA, USA). In addition, monthly remote meetings between the local ICU team  
8  
9 and the respective tele-intensivist are organized to discuss these indicators and to  
10  
11 establish possible improvement action plans.  
12  
13  
14  
15  
16  
17

### 18 *Control Group (usual care)*

19  
20 No interventions are delivered to the ICUs randomised to the control group, except for the  
21  
22 systematic data collection required for the comparisons described in the trial objectives.  
23  
24 However, unlike in the ICUs of the intervention group, these data are not available for the  
25  
26 care team nor to the coordination of the participating ICUs.  
27  
28  
29  
30  
31

### 32 **Sites**

33  
34 The list of potential units was retrieved from the national registry of health facilities  
35  
36 (“Cadastro Nacional de Estabelecimentos de Saúde – CNES”, in Portuguese), filtering those  
37  
38 facilities with at least 8 ICU adult beds available.  
39  
40  
41  
42  
43  
44

### 45 **Inclusion/Exclusion**

46  
47 The ICUs are invited by electronic means for an interview in which the eligibility and feasibility  
48  
49 criteria below will be verified.  
50  
51  
52  
53

### 54 *Inclusion criteria for ICUs*

- 55
- 56
- 57 • ICUs of public or philanthropic hospitals
- 58
- 59 • ICUs with a minimum of 8 ICU beds
- 60

- ICUs with on-site registered doctors and nurses

#### *Exclusion criteria for ICUs*

- ICUs that already presented DMRs, defined as:
  - Meetings (DMRs)  $\geq 3$  times per week, during weekdays, conducted by a certified intensivist and documented in medical records with fixed visit length ( $>5$  min / patient), using some supporting tool (checklist or standard form), goal-oriented, based on established protocols, including all the patients admitted to the ICU.
  - or
  - Monthly management of indicators (audit and feedback) with specific planning.
- Specialized ICUs (ICUs admitting exclusively cardiac surgery, neurological, burned patients).
- Step-down units or coronary units

#### **Patients**

All consecutive patients that fulfil the inclusion criteria and none of the exclusion criteria will be enrolled.

#### **Inclusion/Exclusion**

The patients admitted in the ICU who currently meet the following inclusion criteria are included:

- Age  $\geq 18$  years old
- Patients admitted to the ICU after the beginning of the trial

### *Exclusion criteria for patients*

- Patients admitted to the ICU due to justice-related issues (since in such circumstances the ICU admission or discharge may be determined by law and not medical reasons)
- Patients previously included in the TELESCOPE trial (for the analysis of the primary outcome).

### **Randomisation**

The 30 ICUs are randomly assigned to either the intervention group (n=15) or the control group (n=15) using a restricted randomisation algorithm that minimizes imbalance between treatment groups across the following baseline covariates at the ICU level: number of ICU beds, mean SAPS 3, mean ICU length of stay (LOS), the standardized mortality rate (SMR), the standardized resource use (SRU), and a dummy indicator for Brazilian region where the ICU is located (South/Southeast x North/Northeast/Central-West).<sup>28 29</sup> The randomisation unit will be the ICU to avoid contamination of the intervention. Only one ICU per hospital will be included in the trial. The randomisation is performed at three times, including 14 units during the first randomization, followed by 7 and 9 units. We decided a priori to randomize at three times and the number of units at each randomization was pragmatic, allowing for ethical approval and completion of the baseline period, respecting the minimum of eight units during first randomization and minimum of six on subsequent randomizations.<sup>28</sup> To ensure allocation concealment, the statistician responsible for the randomisation list receives only the ICU identifier code, being unaware of which unit it refers to. The allocation list is sent to the study coordinator, who informs the ICUs about the randomisation. The allocation will be maintained until the end of the study.

### **Blinding**

The intervention is open, due to the nature of the study (Tele-ICU rounds, quality improvement meetings and delivery of evidence-based clinical protocols). The steering and scientific committees are blinded of the DMRs and monthly feedback/audit meetings.

### **Follow-up**

Patients are followed up until hospital discharge by the health care worker responsible for data collection.

### **Outcomes**

#### Primary outcome

At an individual level, the primary outcome of this trial is ICU length of stay, measured in days, taking into account the time interval in hours between patients' ICU admission and time of transfer to another care facility or another hospital, as defined by the hospital's system date and time. Date and time will be entered by the health care worker responsible for data collection.

#### Secondary exploratory outcomes

The secondary outcomes of this study include assessing the impact of interventions implemented through Telemedicine compared to a control group in the following outcomes:

- Classification of the unit according to the profiles defined by the SRU and the SMR.<sup>30</sup>

The SRU reflects the observed / expected rate of resources used (estimated as ICU length of stay for surviving patients), adjusted by patient's severity of illness.<sup>31 32</sup> The

1  
2  
3 SMR reflects the observed / expected rate (according to severity score) of hospital  
4 deaths. The profiles are a combination of SMR (above or below median) and SRU  
5 (above or below median) : Each unit can be assigned to one of four groups: "most  
6 efficient" (SMR and SRU < median); "least efficient" (SMR, SRU > median);  
7 "overachieving" (low SMR, high SRU), "underachieving" (high SMR, low SRU)<sup>31</sup>  
8  
9

- 10 • In-hospital mortality, defined as death by any cause from date of ICU admission until  
11 the date of hospital discharge or death, whichever comes first  
12
- 13 • Incidence of central line-associated bloodstream infection (CLABSI), as defined by the  
14 CDC<sup>33</sup>  
15
- 16 • Incidence of ventilator-associated event (VAE), as defined by the CDC<sup>34</sup>  
17
- 18 • Incidence of catheter-associated urinary tract infection (CAUTI), as defined by the  
19 CDC<sup>35</sup>  
20
- 21 • Ventilator-free days at 28 days, defined as the number of days from successfully  
22 weaning to day 28; patients who died before weaning were deemed to have no  
23 ventilator-free days  
24
- 25 • Patient-days receiving oral or enteral feeding, defined as any amount oral or enteral  
26 diet  
27
- 28 • Patient-days under light sedation or alert and calm [Richmond Agitation-Sedation  
29 Scale (RASS) = -3 to +1]  
30
- 31 • Rate of patients under normoxaemia [peripheral oxygen saturation (SpO<sub>2</sub>) between  
32 92% and 96%]  
33  
34  
35  
36  
37  
38  
39  
40  
41  
42  
43  
44  
45  
46  
47  
48  
49  
50  
51  
52  
53  
54  
55  
56

### 57 *Other exploratory outcomes*

58  
59 Other outcomes, considered merely exploratory, will be observed:  
60

- ICU mortality
- 24-hour ICU readmission rate
- Proportion of mechanical ventilation (MV) use
- Early reintubation rate (<48h after extubation)
- Accidental extubation rate
- Compliance to head of bed elevation for patient under MV
- Rate of central venous catheter (CVC) use and duration
- Rate of urinary catheter use and duration
- Adequate prevention of venous thromboembolism (VTE)
- Rate of patients with adequate glycaemic control

We will truncate the primary and secondary outcomes follow-up at 90 days.

### ***Data collection***

At the patient level, the following data is collected (Table 4):

*At the time of ICU admission:*

- Identifier, date of birth, gender, main reason of ICU admission (adapted from APACHE III),<sup>36</sup> readmission status
- Anthropometric characteristics, comorbidities (adapted from SAPS3),<sup>37</sup> functional status (adapted from ECOG)<sup>37</sup>
- Respiratory, cardiovascular, and renal support
- Diet and sedation status

- Presence of devices: central venous catheter, arterial line, permanent catheters, urinary catheter, oro/naso-tracheal catheter and tracheostomy
- Date and time of hospital admission
- Date and time of ICU admission
- Simplified Acute Physiology (SAPS 3) score<sup>32</sup>
- Sequential organ failure assessment (SOFA) score<sup>38 39</sup>

*Throughout the ICU admission:*

- Documented goals from the DMR
- Documented discharge order status, defined as any mention to readiness to discharge or ICU transference order
- MV status and mechanical ventilation parameters
- SpO<sub>2</sub> range for patients on oxygen therapy
- Head of bed elevation for patients under MV
- Spontaneous respiratory test, accidental extubation or re-intubation events
- Need of vasoactive drugs and renal replacement therapy
- Continuous sedative infusion and light sedation strategy (reduction/daily interruption)
- Daily value (categorized below, above or within -3 to +1 range) of the RASS for patients undergoing continuous sedation at a predetermined time
- Adequacy of VTE prophylaxis: considered adequate when patient is bedridden without any of the following exclusion criteria: active bleeding, stress gastric ulcer, uncontrolled arterial hypertension (>180/110 mmHg), coagulation disorder, allergy,



1  
2  
3 kidney failure (Cl<30 ml/min), ocular or cranial surgery in last 2 weeks, and lumbar  
4  
5  
6 puncture in last 24h).

- 7  
8
- 9 • Presence of oral or enteral nutrition
  - 10
  - 11 • Glycemic control: considered adequate if between 60 to 180 mg/dL
  - 12
  - 13 • Notification of health-care-related infection episodes according to CDC (Centers for  
14  
15 Disease Control and Prevention) criteria:
    - 16
    - 17
    - 18 ○ Central-line associated bloodstream infection (CLABSI)<sup>33</sup>
    - 19
    - 20 ○ Ventilator-associated events (VAE)<sup>34</sup>
    - 21
    - 22
    - 23 ○ Catheter-associated urinary tract infection (CAUTI)<sup>35</sup>
    - 24
    - 25 ○ Date and time of central venous catheter (CVC) insertion for patients  
26  
27 undergoing CVC insertion
    - 28
    - 29
    - 30 • Date and time of withdrawal of CVC for patients undergoing CVC insertion
    - 31
    - 32 • Date and time of indwelling urinary catheter (IUC) insertion for patients submitted to  
33  
34 IUC insertion
    - 35
    - 36 • Date and time of withdrawal of IUC for patients undergoing IUC insertion
    - 37
    - 38 • Documentation of decisions for limiting the life support considering any mention to  
39  
40 withholding or withdrawing in the medical records
    - 41  
42  
43  
44  
45  
46

47 *At the time of ICU discharge*

- 48
- 49 • Date and time of ICU discharge
  - 50
  - 51
  - 52 • ICU outcome: discharge to ward, hospital transfer, death
  - 53  
54  
55

56  
57 *At the time of hospital discharge*

- 58
- 59 • Date and time of hospital discharge
  - 60

- Hospital outcome: hospital transfer, death

### **Data collection and management**

Trained health care workers collect data, without any involvement from the study committees and investigators. We developed a standard CRFs for the trial, with extensive validation and piloting aiming clarity and consistency.

Data is input using electronic CRFs in the Research Electronic Data Capture system (REDCap®, USA) via Internet and hosted on a server at the Hospital Israelita Albert Einstein/São Paulo - Brazil. Medical data from tele-intensivist consultations is generated and stored using a specific platform developed by the Tele-ICU Department of the Hospital Israelita Albert Einstein/São Paulo - Brazil. Images and audio are never saved or stored. The electronic files are stored in the hospital's servers in a controlled and secure environment to guarantee confidentiality. Furthermore, access to all documents is user and password controlled. To ensure data quality, the following procedures are performed:

- All professionals responsible for data collection are trained before the beginning of the trial in order to guarantee clear definitions for accurate data collection;
- A research nurse from the Coordinating Centre is available 24/7 to solve any problem and question about data collection;
- Data input in the system are submitted to near real-time verifications to detect missing data, values outside expected and logic patterns;
- Remote data monitoring is performed regularly to detect patterns of anomalies, consistency or credibility problems and other anomalies – according to pre-established queries created by the system. Any missing data or outlier is individually reviewed for inspection;

- The Coordinating Centre reviews follow-up reports regularly to ensure their consistency and completeness;
- Centre monitoring is performed while the study is being conducted. A trained professional is assigned by the Coordinating Centre to monitor the study participating centres. All the information obtained during the monitoring visits are strictly confidential.

## **Monitoring**

### ***Interim analyses***

Since our intervention gathers the best available evidence for care of critically ill patients admitted to the ICUs, and we do not predict inherent risks in the performance of the trial, interim analyses are not planned. Therefore, a formal Data Monitoring Committee was deemed unneeded. Adverse events are not expected to occur but could be reported by local researchers, data assistants, and local doctors.

### ***Intervention Monitoring***

Considering the study aim is to evaluate the impact of a complex intervention (composed by DMR, management of ICU performance indicators, and provision of clinical protocols), specific data (implementation indicators) will be collected and followed in order to ensure adherence to the protocol:

- a) DMR rate per site/bed/day, and DMR duration (including individual and periodic feedback to each tele-intensivist).
- b) Rate of recommendations made, and validated (accepted and not accepted)  
/ DMR

- 1  
2  
3 c) Monthly meeting on performance indicators reports: tele-intensivists will  
4  
5 send to study team monthly reports including the executive summary (file  
6  
7 sent to the leaderships of each study center/intervention arm, before the  
8  
9 monthly meeting) and the meeting record file (structured data about  
10  
11 highlighted indicators, action plan, responsibility, and due dates).  
12  
13  
14  
15 d) Access to the clinical protocols: absolute number of accesses to the video-  
16  
17 protocols will be provided and followed.  
18  
19

### 20 **Auditing**

21  
22 Trial conduct is subjected to audit by Einstein Research Integrity Committee, at any time,  
23  
24 independently of the IRB and research team, the same way as any interventional studies  
25  
26 performed at Albert Einstein Hospital (random selection).  
27  
28

### 29 **Power/Sample size calculation**

30  
31 We estimated a mean ICU length-of-stay of 8 [standard deviation (SD) 10] days for general  
32  
33 adult public ICUs in Brazil. We used data from published literature and reports from the online  
34  
35 project "UTIs Brasileiras".<sup>40</sup> Using data from 20 ICUs (10 ICUs from Ranzani et al,<sup>41</sup> 10 ICUs  
36  
37 from the ORCHESTRA study,<sup>42</sup> available in the *ems* R package), we estimated an intraclass  
38  
39 correlation coefficient of 0.018. Considering a two-arm cluster trial with an ICC of 0.018, for  
40  
41 a minimum difference of an average length of stay of 1.5 days (8.0 to 6.5 days) and SD of 10  
42  
43 days, power 80%, alpha 5%, we would need a total of 30 clusters (15 intervention units and  
44  
45 15 control units) with an average cluster size of 500 patients per ICU over a period of 18  
46  
47 months. If we use a coefficient of variation of cluster size, estimated by the expected  
48  
49 minimum and maximum method, we will maintain 80% power if the difference between the  
50  
51 clusters minimum and maximum size is 150 patients. If needed, after the baseline period, we  
52  
53  
54  
55  
56  
57  
58  
59  
60

1  
2  
3 might review the sample calculation and simulate the power for secondary outcomes, using  
4  
5 the data from the selected ICUs.  
6  
7

### 8 **Analysis**

9

10 All analyses will be thoroughly described in a statistical analysis plan (SAP), which will be  
11  
12 concluded and submitted for publishing prior to database closure and the beginning of  
13  
14 analyses. Primary statistical analyses will be performed according to the intention-to-treat  
15  
16 principle. All outcomes at the patient-level will be performed using models that account for  
17  
18 correlated data within each ICU (ie, ICU as a cluster) with generalised linear mixed models  
19  
20 and adjusted by pre-specified covariates, as will be specified in the SAP. Pre-specified  
21  
22 secondary outcomes and subgroup analyses will not be adjusted for multiple comparisons.  
23  
24 They should, therefore, be interpreted as exploratory. We pre-specified three subgroups:  
25  
26 type of admission (medical vs. surgical), by tertiles of SAPS3 and mechanical ventilation status  
27  
28 (invasive MV vs. not-invasive MV). Sub-groups will be analyzed as an interaction term.  
29  
30  
31  
32  
33  
34

35 We will evaluate the calibration of the SAPS3 model with data from the baseline  
36  
37 period. If necessary, we will recalibrate the model for the studied population. We plan to  
38  
39 perform multiple imputation if missing data on core variables will be >5% and we will use  
40  
41 standard steps for multiple imputation using chained equations. All analyses will be  
42  
43 performed with program R (3.4.1 version, the version will be updated at the time of analysis).  
44  
45  
46  
47  
48  
49

### 50 **ETHICS AND DISSEMINATION**

51

52 The project was approved by local Research Ethics Committee (IRB) of the  
53  
54 coordinating study centre (Hospital Israelita Albert Einstein) (CAAE: 01523118.0.1001.0071)  
55  
56 and by the local IRB from each one of the 30 ICUs (supplementary file 2), following the  
57  
58 Brazilian legislation. A specialist in regulatory process will oversee and support the local  
59  
60

1  
2  
3 process. Any modifications in the protocol that might affect the development of the study  
4  
5 and its potential benefits or safety, including changes in the objectives, design, study  
6  
7 population, sample size, interventions or relevant management aspects, will require  
8  
9 amendments to the protocol. Such amendments should be submitted to the IRB of the  
10  
11 coordinating centre and all the IRBs at the participating centre for proper approval. There will  
12  
13 be rigorous procedures of protocol version control.  
14  
15  
16

17  
18 The need for patients' written informed consent was waived in all 30 centres. For one  
19  
20 centre, it was requested written informed consent for health care professionals involved in  
21  
22 the tele-ICU visits. We obtained written agreement from the Director of each institution as  
23  
24 well as by the ICU coordinator.<sup>43-46</sup>  
25  
26

27  
28 Therefore, the set interventions are not specifically directed to the patients but to the  
29  
30 whole cluster together: the ICU (intervention type A).<sup>47</sup> In this type of interventions, there is  
31  
32 only one decision to be made for each cluster and individual choice are not appropriated.<sup>47</sup>  
33  
34 In this sense, informed consent was proposed and signed in the cluster-level. In the best  
35  
36 interest of patients, medical teams and other professionals, the Hospital Director and the  
37  
38 Head of ICU (Physician) were the responsible to sign the consent form. This proposal was  
39  
40 approved by all the involved IRBs (coordinating centre and the IRBs of each one of the 30  
41  
42 participant hospitals).  
43  
44  
45

46  
47 All the information in the study will be stored (in paper and/or magnetic media) at  
48  
49 the coordinating centre. All patient-level data will be anonymized, and will be accessed only  
50  
51 by the data manager and statistician. Access to information from the participants (during the  
52  
53 visits) will be restricted to the intensivists performing daily rounds via Telemedicine. All  
54  
55 records with names or other identifiers will be stored separately from the study records.  
56  
57 Information on patients will not be disclosed except for regulatory purposes.  
58  
59  
60

1  
2  
3 The TELESCOPE study Steering Committee commits to publishing the study results,  
4 whatever they may be. The results of this study will be mainly disseminated through  
5 international scientific publication. The main result of this project will be reported in an  
6 article and sub-studies are planned. Results of this project are expected to be presented in  
7 major sessions at national and international congresses, especially in the field of intensive  
8 care medicine. Study results are expected to be promoted to the lay press and disseminated  
9 in various media outlets due to its impact on the health system.  
10  
11  
12  
13  
14  
15  
16  
17  
18  
19  
20  
21  
22

### 23 **TRIAL STATUS**

24  
25 This paper presents the protocol for the TELESCOPE trial (original version, 1.0, approved in  
26 07/11/2018). The baseline period started on 01/06/2019. First randomisation and  
27 interventions started in 05/08/2019. At the time of first version of the manuscript submission,  
28 data collection for the trial was ongoing and due to be complete in the first semester of 2021.  
29  
30  
31  
32  
33  
34  
35  
36  
37

### 38 **ADDITIONAL INFORMATION**

#### 39 **Funding**

40  
41  
42 The study was conducted in partnership with the Brazilian Ministry of Health through the  
43 Institutional Development Program of the Unified Health System (PROADI - SUS, NUP  
44 25000.018804/2018-23.), and classified in one of the objectives of the National Health Plan,  
45 highlighting the relevance and potential contribution of the project to the governance of the  
46 SUS, according to the ordinance 3.362, 12/8/2017.  
47  
48  
49  
50  
51  
52  
53  
54  
55  
56  
57  
58

#### 59 **Authorship**

1  
2  
3 Authorship will follow current guidelines of International Committee of Medical Journal  
4 Editors (ICMJE). Executive and Steering Committee are planned to be list as authors/co-  
5  
6 authors, since fulfilling authorship criteria (substantive contributions to the design, conduct,  
7  
8 interpretation, and reporting of a clinical trial). If some protocol authors are not named  
9  
10 author info publications (not fulfil such criteria), their names will be acknowledged in the  
11  
12 reports. Three main papers are planned: Protocol paper, Statistical Analysis Plan, Main Paper  
13  
14 (trial results). Principal Investigator - AJP, Senior Researcher - DTN and OTR - Statistician  
15  
16 Specialist will share and alternate in first, second and last positions. Local PIs will be cited as  
17  
18 collaborators in the main paper. The same is planned for abstracts or oral presentations in  
19  
20 international meetings. Disputes regarding authorship will be settled by the Study Chair and  
21  
22 Executive Committee. Professional writer's participations are not planned.  
23  
24  
25  
26  
27  
28  
29  
30  
31

### 32 **Competing interests**

33  
34  
35 None declared.  
36  
37  
38  
39

### 40 **Patient consent**

41  
42 Not required.  
43  
44  
45  
46

### 47 **Patient and public involvement**

48  
49 This research was done without patient involvement in its design or development. Patients  
50  
51 were not invited to contribute to the writing or editing of this document for readability or  
52  
53 accuracy. This was due to logistic limitations (critical care patients in a national wide study).  
54  
55 Outcomes were chosen according to traditional indicators in the critical care area.  
56  
57  
58  
59  
60



### **Ethics approval**

This study will be conducted according to the resolution no 466/12 of the Brazilian National Health Council ([http://bvsms.saude.gov.br/bvs/saudelegis/cns/2013/res0466\\_12\\_12\\_2012.html](http://bvsms.saude.gov.br/bvs/saudelegis/cns/2013/res0466_12_12_2012.html)). The study protocol has been approved by the Research Ethics Committee of the coordinating site (approval number: CAAE 01523118.0.1001.0071) and the Research Ethics Committees of all participant institutions (supplementary file 2).

### **Acknowledgments**

The authors would like to thank the central TELESCOPE team, data collection team of each participating ICU, as well as the Hospital Israelita Albert Einstein, the Brazilian Ministry of Health, and the Brazilian Research in Intensive Care Network (BRICNET) for their support in conducting the study.

## REFERENCES

1. Angus DC, Linde-Zwirble WT, Lidicker J, et al. Epidemiology of severe sepsis in the United States: analysis of incidence, outcome, and associated costs of care. *Crit Care Med* 2001;29(7):1303-10. [published Online First: 2001/07/11]
2. Rubenfeld GD, Caldwell E, Peabody E, et al. Incidence and outcomes of acute lung injury. *N Engl J Med* 2005;353(16):1685-93. doi: 353/16/1685 [pii] 10.1056/NEJMoa050333
3. Adhikari NK, Fowler RA, Bhagwanjee S, et al. Critical care and the global burden of critical illness in adults. *Lancet* 2010;376(9749):1339-46. doi: 10.1016/s0140-6736(10)60446-1 [published Online First: 2010/10/12]
4. Needham DM, Bronskill SE, Calinawan JR, et al. Projected incidence of mechanical ventilation in Ontario to 2026: Preparing for the aging baby boomers. *Crit Care Med* 2005;33(3):574-9. [published Online First: 2005/03/09]
5. Angus DC, Barnato AE, Linde-Zwirble WT, et al. Use of intensive care at the end of life in the United States: an epidemiologic study. *Crit Care Med* 2004;32(3):638-43.
6. Burden of disease in Brazil, 1990-2016: a systematic subnational analysis for the Global Burden of Disease Study 2016. *Lancet* 2018;392(10149):760-75. doi: 10.1016/s0140-6736(18)31221-2 [published Online First: 2018/07/25]
7. Barreto MdS, Carreira, L., & Marcon, S.S. Envelhecimento populacional e doenças crônicas: Reflexões sobre os desafios para o Sistema de Saúde Pública. *Revista Kairós Gerontologia* 2015;18(1) [published Online First: 339]
8. Lima-Costa MF, De Oliveira C, Macinko J, et al. Socioeconomic inequalities in health in older adults in Brazil and England. *American journal of public health* 2012;102(8):1535-41. doi: 10.2105/ajph.2012.300765 [published Online First: 2012/06/16]
9. Veras RP, Oliveira M. Aging in Brazil: the building of a healthcare model. *Ciencia & saude coletiva* 2018;23(6):1929-36. doi: 10.1590/1413-81232018236.04722018 [published Online First: 2018/07/05]
10. Ball IM, Bagshaw SM, Burns KE, et al. Outcomes of elderly critically ill medical and surgical patients: a multicentre cohort study. *Canadian journal of anaesthesia = Journal canadien d'anesthesie* 2017;64(3):260-69. doi: 10.1007/s12630-016-0798-4 [published Online First: 2016/12/29]
11. Chin-Yee N, D'Egidio G, Thavorn K, et al. Cost analysis of the very elderly admitted to intensive care units. *Crit Care* 2017;21(1):109. doi: 10.1186/s13054-017-1689-y [published Online First: 2017/05/17]
12. Zampieri FG, Iwashyna TJ, Vigiante EM, et al. Association of frailty with short-term outcomes, organ support and resource use in critically ill patients. *Intensive Care Med* 2018;44(9):1512-20. doi: 10.1007/s00134-018-5342-2
13. Valley TS, Noritomi DT. ICU beds: less is more? Yes. *Intensive Care Med* 2020 doi: 10.1007/s00134-020-06042-1
14. Lane D, Ferri M, Lemaire J, et al. A systematic review of evidence-informed practices for patient care rounds in the ICU\*. *Crit Care Med* 2013;41(8):2015-29. doi: 10.1097/CCM.0b013e31828a435f [published Online First: 2013/05/15]
15. Pronovost PJ, Angus DC, Dorman T, et al. Physician staffing patterns and clinical outcomes in critically ill patients: a systematic review. *JAMA* 2002;288(17):2151-62.
16. Kim MM, Barnato AE, Angus DC, et al. The effect of multidisciplinary care teams on intensive care unit mortality. *Arch Intern Med* 2010;170(4):369-76. doi: 10.1001/archinternmed.2009.521 [published Online First: 2010/02/24]
17. Medicine Io. Telemedicine: A Guide to Assessing Telecommunications for Health Care. Washington, DC: The National Academies Press 1996.

18. Grundy BL, Crawford P, Jones PK, et al. Telemedicine in critical care: an experiment in health care delivery. *Jacep* 1977;6(10):439-44. [published Online First: 1977/10/01]
19. Vranas KC, Slatore CG, Kerlin MP. Telemedicine Coverage of Intensive Care Units: A Narrative Review. *Annals of the American Thoracic Society* 2018 doi: 10.1513/AnnalsATS.201804-225FR [published Online First: 2018/08/10]
20. Kahn JM, Cicero BD, Wallace DJ, et al. Adoption of ICU telemedicine in the United States. *Crit Care Med* 2014;42(2):362-8. doi: 10.1097/CCM.0b013e3182a6419f [published Online First: 2013/10/23]
21. Lilly CM, Zubrow MT, Kempner KM, et al. Critical care telemedicine: evolution and state of the art. *Crit Care Med* 2014;42(11):2429-36. doi: 10.1097/ccm.0000000000000539 [published Online First: 2014/08/01]
22. Lilly CM, Fisher KA, Ries M, et al. A national ICU telemedicine survey: validation and results. *Chest* 2012;142(1):40-47. doi: 10.1378/chest.12-0310 [published Online First: 2012/04/21]
23. Fuhrman SA, Lilly CM. ICU Telemedicine Solutions. *Clinics in chest medicine* 2015;36(3):401-7. doi: 10.1016/j.ccm.2015.05.004 [published Online First: 2015/08/26]
24. Young LB, Chan PS, Lu X, et al. Impact of telemedicine intensive care unit coverage on patient outcomes: a systematic review and meta-analysis. *Arch Intern Med* 2011;171(6):498-506. doi: 10.1001/archinternmed.2011.61 [published Online First: 2011/03/30]
25. Wilcox ME, Adhikari NK. The effect of telemedicine in critically ill patients: systematic review and meta-analysis. *Crit Care* 2012;16(4):R127. doi: 10.1186/cc11429 [published Online First: 2012/07/20]
26. Chen J, Sun D, Yang W, et al. Clinical and Economic Outcomes of Telemedicine Programs in the Intensive Care Unit: A Systematic Review and Meta-Analysis. *J Intensive Care Med* 2018;33(7):383-93. doi: 10.1177/0885066617726942
27. Chan AW, Tetzlaff JM, Altman DG, et al. SPIRIT 2013 statement: defining standard protocol items for clinical trials. *Ann Intern Med* 2013;158(3):200-7. doi: 10.7326/0003-4819-158-3-201302050-00583 [published Online First: 2013/01/09]
28. Carter BR, Hood K. Balance algorithm for cluster randomized trials. *BMC Med Res Methodol* 2008;8:65. doi: 10.1186/1471-2288-8-65
29. Richards-Belle A, Mouncey PR, Wade D, et al. Psychological Outcomes following a nurse-led Preventative Psychological Intervention for critically ill patients (POPPI): protocol for a cluster-randomised clinical trial of a complex intervention. *BMJ Open* 2018;8(2):e020908. doi: 10.1136/bmjopen-2017-020908
30. Rapoport J, Teres D, Lemeshow S, et al. A method for assessing the clinical performance and cost-effectiveness of intensive care units: a multicenter inception cohort study. *Crit Care Med* 1994;22(9):1385-91. [published Online First: 1994/09/01]
31. Rothen HU, Stricker K, Einfalt J, et al. Variability in outcome and resource use in intensive care units. *Intensive Care Med* 2007;33(8):1329-36. doi: 10.1007/s00134-007-0690-3 [published Online First: 2007/06/02]
32. Moreno RP, Metnitz PG, Almeida E, et al. SAPS 3--From evaluation of the patient to evaluation of the intensive care unit. Part 2: Development of a prognostic model for hospital mortality at ICU admission. *Intensive Care Med* 2005;31(10):1345-55. doi: 10.1007/s00134-005-2763-5
33. Centers for Disease Control and Prevention. Bloodstream Infection Event (Central Line-Associated Bloodstream Infection and Non-central Line Associated Bloodstream Infection) 2018 [Available from:

- 1  
2  
3 [https://www.cdc.gov/nhsn/PDFs/pscManual/4PSC\\_CLABSCurrent.pdf](https://www.cdc.gov/nhsn/PDFs/pscManual/4PSC_CLABSCurrent.pdf) accessed  
4 September 2018.  
5  
6 34. Centers for Disease Control and Prevention. Pneumonia (Ventilator-associated [VAP] and  
7 non-ventilator-associated Pneumonia [PNEU]) Event 2018 [Available from:  
8 <https://www.cdc.gov/nhsn/pdfs/pscmanual/6pscvapcurrent.pdf> accessed September  
9 2018.  
10  
11 35. Centers for Disease Control and Prevention. Urinary Tract Infection (Catheter-Associated  
12 Urinary Tract Infection [CAUTI] and Non-Catheter-Associated Urinary Tract Infection  
13 [UTI]) and Other Urinary System Infection [USI]) Events 2018 [Available from:  
14 <https://www.cdc.gov/nhsn/pdfs/pscmanual/7psccauticurrent.pdf> accessed September  
15 2018.  
16  
17 36. Knaus WA, Wagner DP, Draper EA, et al. The APACHE III prognostic system. Risk  
18 prediction of hospital mortality for critically ill hospitalized adults. *Chest*  
19 1991;100:1619-36.  
20  
21 37. Zampieri FG, Soares M, Borges LP, et al. The Epimed Monitor ICU Database(R): a cloud-  
22 based national registry for adult intensive care unit patients in Brazil. *Rev Bras Ter*  
23 *Intensiva* 2017;29(4):418-26. doi: 10.5935/0103-507X.20170062  
24  
25 38. Vincent JL, Moreno R, Takala J, et al. The SOFA (Sepsis-related Organ Failure  
26 Assessment) score to describe organ dysfunction/failure. On behalf of the Working  
27 Group on Sepsis-Related Problems of the European Society of Intensive Care  
28 Medicine. *Intensive Care Med* 1996;22:707-10.  
29  
30 39. Pandharipande PP, Shintani AK, Hagerman HE, et al. Derivation and validation of  
31 Spo2/Fio2 ratio to impute for Pao2/Fio2 ratio in the respiratory component of the  
32 Sequential Organ Failure Assessment score. *Crit Care Med* 2009;37(4):1317-21. doi:  
33 10.1097/CCM.0b013e31819cefa9  
34  
35 40. Society. TBCC. Brazilian ICUs Project. 2018 [Available from:  
36 <http://www.utisbrasileiras.com.br/perfis-das-utis/evolucao-do-smr-e-do-sruhospitalar/>  
37 [-!/evolutivo-da-turp-sru-hospitalar\)](http://www.utisbrasileiras.com.br/perfis-das-utis/evolucao-do-smr-e-do-sruhospitalar/) accessed 01/09/2018.  
38  
39 41. Ranzani OT, Simpson ES, Augusto TB, et al. Evaluation of a minimal sedation protocol  
40 using ICU sedative consumption as a monitoring tool: a quality improvement  
41 multicenter project. *Crit Care* 2014;18(5):580. doi: 10.1186/s13054-014-0580-3  
42  
43 42. Soares M, Bozza FA, Angus DC, et al. Organizational characteristics, outcomes, and  
44 resource use in 78 Brazilian intensive care units: the ORCHESTRA study. *Intensive*  
45 *Care Med* 2015;41(12):2149-60. doi: 10.1007/s00134-015-4076-7  
46  
47 43. Hutton JL, Eccles MP, Grimshaw JM. Ethical issues in implementation research: a  
48 discussion of the problems in achieving informed consent. *Implementation science : IS*  
49 2008;3:52. doi: 10.1186/1748-5908-3-52 [published Online First: 2008/12/19]  
50  
51 44. McRae AD, Weijer C, Binik A, et al. When is informed consent required in cluster  
52 randomized trials in health research? *Trials* 2011;12:202. doi: 10.1186/1745-6215-12-  
53 202 [published Online First: 2011/09/13]  
54  
55 45. Giraudeau B, Caille A, Le Gouge A, et al. Participant informed consent in cluster  
56 randomized trials: review. *PloS one* 2012;7(7):e40436. doi:  
57 10.1371/journal.pone.0040436 [published Online First: 2012/07/14]  
58  
59 46. Sim J, Dawson A. Informed consent and cluster-randomized trials. *American journal of*  
60 *public health* 2012;102(3):480-5. doi: 10.2105/ajph.2011.300389 [published Online  
First: 2012/03/07]  
47. Medical Research Council. Cluster randomised trials: Methodological and ethical  
considerations MRC clinical trials series. 2002. Available at:  
[https://www.cebm.org/wp-content/uploads/Cluster-randomised-trials-  
Methodological-and-ethical-considerations.pdf](https://www.cebm.org/wp-content/uploads/Cluster-randomised-trials-Methodological-and-ethical-considerations.pdf). Last access in January 5th, 2021.

**Table 1. Synopsis (WHO trial registration data set)**

| Data category                              | Information                                                                                                                                                                                           |
|--------------------------------------------|-------------------------------------------------------------------------------------------------------------------------------------------------------------------------------------------------------|
| Primary register and identification number | <a href="https://clinicaltrials.gov/ct2/show/study/NCT03920501">ClinicalTrials.gov</a> - NCT03920501                                                                                                  |
| Date of first registration                 | April 19, 2019                                                                                                                                                                                        |
| Secondary identification numbers           | PROADI 25000.018804/2018-23                                                                                                                                                                           |
| Development agency / funding source        | Ministry of Health (Institutional Development Program of the Unified Health System – PROADI SUS)                                                                                                      |
| Primary sponsor                            | Ministry of Health                                                                                                                                                                                    |
| Secondary sponsor                          | Hospital Israelita Albert Einstein                                                                                                                                                                    |
| General contact                            | <i>DN</i> , MD, PhD. Phone: (+55) 11 96490-7494, e-mail: <a href="mailto:danilo.noritomi@einstein.br">danilo.noritomi@einstein.br</a>                                                                 |
| Academic contact                           | <i>DN</i> , MD, PhD. Phone: (+55) 11 96490-7494, e-mail: <a href="mailto:danilo.noritomi@einstein.br">danilo.noritomi@einstein.br</a>                                                                 |
| Public title                               | The influence of Telemedicine in the treatment of Intensive Care Unit (ICU) patients.                                                                                                                 |
| Academic title                             | Multicentric, controlled, cluster randomized superiority study to evaluate the effectiveness of specialist assistance via Telemedicine in patients admitted to ICUs in Brazilian hospitals.           |
| Countries involved in recruitment          | Brazil                                                                                                                                                                                                |
| Health conditions/ problems studied        | ICU care design, critically ill patients, Telemedicine.                                                                                                                                               |
| Interventions                              | Comparator: use of Telemedicine (intensivists) in daily ICU multidisciplinary rounds and quality indicators management (audit and feedback)<br>Control: ICUs in the same strata, with no intervention |

| Data category                         | Information                                                                                                                                                                                                                                                                                                                                                                                                                                                                                                                                                                                                                                              |
|---------------------------------------|----------------------------------------------------------------------------------------------------------------------------------------------------------------------------------------------------------------------------------------------------------------------------------------------------------------------------------------------------------------------------------------------------------------------------------------------------------------------------------------------------------------------------------------------------------------------------------------------------------------------------------------------------------|
| Main inclusion and exclusion criteria | <p>ICU clusters (all adult patients admitted after the beginning of the study will be included, with the exception of those admitted for non-medical reasons)</p> <p>Age: <math>\geq 18</math> years old</p> <p>Sex: Both</p> <p>Accepts volunteers: No</p> <p>Inclusion criteria for units: Public Hospital ICUs with a minimum of 8 hospital beds interested and committed to participating in the study.</p> <p>Exclusion criteria for units: Units with fully established daily multidisciplinary rounds by an intensivist, specialized units (such as ICUs admitting exclusively cardiac surgical or neurological patients) or step-down units.</p> |
| Type of study                         | <p>Intervention / cluster</p> <p>Allocation: randomization stratified by patients' previous ICU length of stay</p> <p>Intervention design: parallel assignment</p> <p>Masking: Open</p> <p>Primary purpose: Quality improvement</p>                                                                                                                                                                                                                                                                                                                                                                                                                      |
| Expected date of first inclusion      | February 2019                                                                                                                                                                                                                                                                                                                                                                                                                                                                                                                                                                                                                                            |
| Sample size                           | 30 clusters (15 in each group), approximately 15.000 patients                                                                                                                                                                                                                                                                                                                                                                                                                                                                                                                                                                                            |
| Recruitment status                    | Not initiated (expected for 2019)                                                                                                                                                                                                                                                                                                                                                                                                                                                                                                                                                                                                                        |
| Primary outcome                       | Length of stay in the ICU (days)                                                                                                                                                                                                                                                                                                                                                                                                                                                                                                                                                                                                                         |

| Data category      | Information                                                                                                                                                                                                                                                                                                                                                                                                                                                                                                                                                                                                                                                                                                                                                                                                                                                                   |
|--------------------|-------------------------------------------------------------------------------------------------------------------------------------------------------------------------------------------------------------------------------------------------------------------------------------------------------------------------------------------------------------------------------------------------------------------------------------------------------------------------------------------------------------------------------------------------------------------------------------------------------------------------------------------------------------------------------------------------------------------------------------------------------------------------------------------------------------------------------------------------------------------------------|
| Secondary outcomes | <ul style="list-style-type: none"> <li>• Classification based on the association between standardized mortality ratio (SMR) and standardized resource use (SRU)</li> <li>• Rate per patient per day receiving oral or enteral nutrition</li> <li>• Rate per patient per day in appropriate sedation (RASS = -3 to +1)</li> <li>• Rate of normoxic patients on oxygen therapy (92% <math>\geq</math>SpO<sub>2</sub><math>\geq</math>96%)</li> <li>• Time without mechanical ventilation (MV) in 28 days</li> <li>• Duration of CVC use</li> <li>• Duration of vesical delayed probe (VDP) use</li> <li>• Incidence of central line-associated bloodstream infection (CLABSI) (43)</li> <li>• Incidence of ventilator-associated pneumonia (VAP) (44)</li> <li>• Incidence of catheter-associated urinary tract infection (CAUTI) (45)</li> <li>• Hospital Mortality</li> </ul> |



**Table 2. Project version control**

| Date               | Comments                                 |
|--------------------|------------------------------------------|
| September 25, 2018 | Original version (version 1.0)           |
| October 09, 2020   | Updated risks and benefits (version 2.0) |
| December 31, 2020  | Enrolment period extension (version 3.0) |

For peer review only



**Table 3. Intervention framework**

| <b>Component</b>                                                             | <b>Frequency</b>        | <b>Tool</b>                                              | <b>Goal</b>                                       | <b>Attendees</b>                                                        |
|------------------------------------------------------------------------------|-------------------------|----------------------------------------------------------|---------------------------------------------------|-------------------------------------------------------------------------|
| Multidisciplinary rounds (DMR) by telemedicine                               | Daily (Monday – Friday) | Semi – structured patient electronic forms               | Establish a therapeutic plan for each ICU patient | Bedside clinicians, nurse and physiotherapists                          |
| Discussion of care performance indicators performed through virtual meetings | Monthly                 | Report with quality indicators (monthly temporal series) | Action Plan for suboptimal quality indicators     | Bedside clinicians, ICU head of department, quality improvement members |

**Table 4. Patient data collection schedule**

|                                          | Baseline period |       |           | After randomisation |       |           |
|------------------------------------------|-----------------|-------|-----------|---------------------|-------|-----------|
|                                          | Admission       | Daily | Discharge | Admission           | Daily | Discharge |
| Patient details                          | x               |       |           | x                   |       |           |
| Pre ICU events                           | x               |       |           | x                   |       |           |
| Type and cause of admission              | x               |       |           | x                   |       |           |
| Severity scores (SAPS 3 and SOFA)        | x               |       |           | x                   |       |           |
| Comorbidities / functional status        | x               |       |           | x                   |       |           |
| Treatment goals                          |                 | x     |           |                     | x     |           |
| Organ support and devices                | x               | x     |           | x                   | x     |           |
| Hospital-acquired infections             |                 | x     |           |                     | x     |           |
| Length of stay (ICU/Hospital)            |                 | x     | x         |                     | x     | x         |
| Mortality and destination (ICU/Hospital) |                 | x     | x         |                     | x     | x         |

ICU: intensive care unit; SAPS 3 score: simplified acute physiology score; SOFA score: sequential organ failure assessment score.

1  
2  
3 **FIGURES**  
4

5 **Figure 1. Geographic distribution of the 30 ICUs participating in the TELESCOPE trial**  
6

7  
8 **Figure 2. Trial timeline, randomisation, intervention and follow-up**

9 ICU: intensive care unit; IRB: institutional review board  
10

11  
12 **Figure 3. Illustration of the multicomponent training of board-certified intensivists to act in**  
13 **the intervention arm**

14 ICU: intensive care unit; IHI: Institute for Healthcare Improvement  
15  
16  
17  
18  
19  
20  
21  
22  
23  
24  
25  
26  
27  
28  
29  
30  
31  
32  
33  
34  
35  
36  
37  
38  
39  
40  
41  
42  
43  
44  
45  
46  
47  
48  
49  
50  
51  
52  
53  
54  
55  
56  
57  
58  
59  
60

1  
2  
3  
4  
5  
6  
7  
8  
9  
10  
11  
12  
13  
14  
15  
16  
17  
18  
19  
20  
21  
22  
23  
24  
25  
26  
27  
28  
29  
30  
31  
32  
33  
34  
35  
36  
37  
38  
39  
40  
41

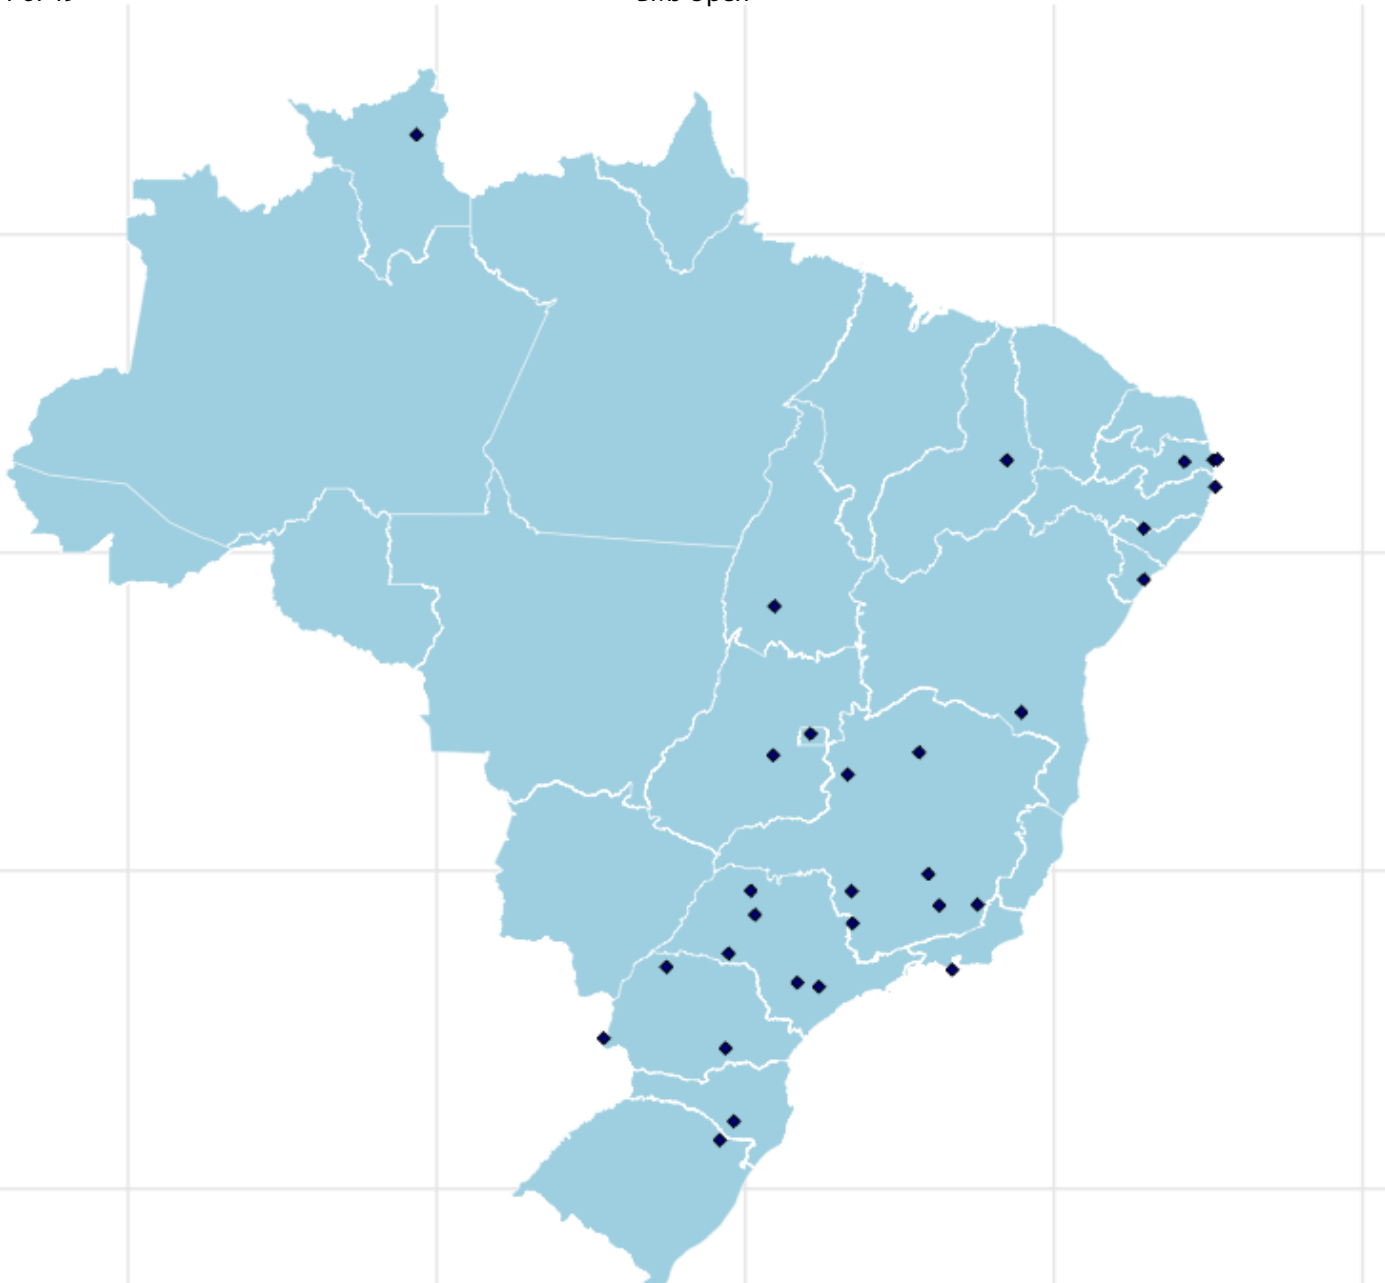

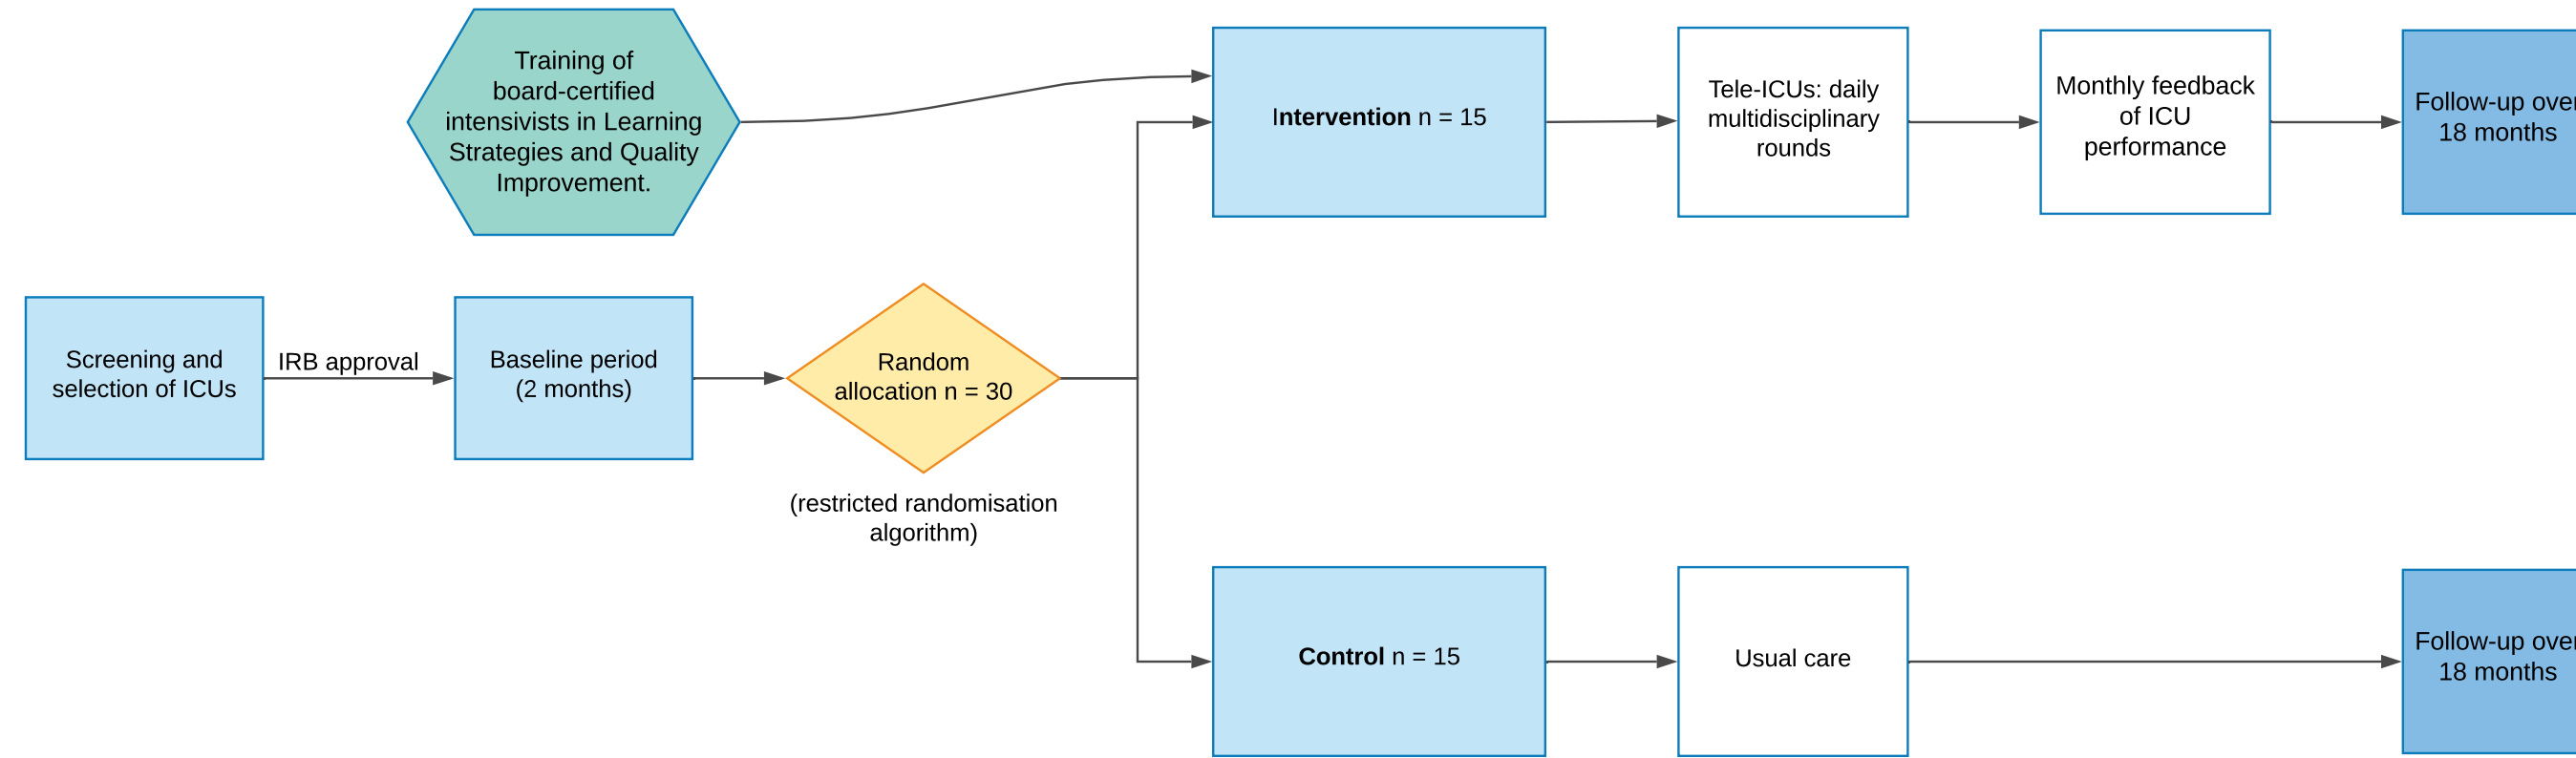

1  
2  
3  
4  
5  
6  
7  
8  
9  
10  
11  
12  
13  
14  
15  
16  
17  
18  
19  
20  
21  
22  
23  
24  
25  
26  
27  
28  
29  
30  
31  
32  
33  
34  
35  
36  
37  
38  
39  
40  
41  
42  
43  
44  
45  
46  
47  
48

1  
2  
3  
4  
5  
6  
7  
8  
9  
10  
11  
12  
13  
14  
15  
16  
17  
18  
19  
20  
21  
22  
23  
24  
25  
26  
27  
28  
29  
30  
31  
32  
33  
34  
35  
36  
37  
38  
39  
40  
41  
42  
43  
44  
45  
46  
47





SPIRIT 2013 Checklist: Recommended items to address in a clinical trial protocol and related documents\*

| Section/item                      | Item No | Description                                                                                                                                                                                                                                                                              | Addressed on page number |
|-----------------------------------|---------|------------------------------------------------------------------------------------------------------------------------------------------------------------------------------------------------------------------------------------------------------------------------------------------|--------------------------|
| <b>Administrative information</b> |         |                                                                                                                                                                                                                                                                                          |                          |
| Title                             | 1       | Descriptive title identifying the study design, population, interventions, and, if applicable, trial acronym                                                                                                                                                                             | 01                       |
| Trial registration                | 2a      | Trial identifier and registry name. If not yet registered, name of intended registry                                                                                                                                                                                                     | 01                       |
|                                   | 2b      | All items from the World Health Organization Trial Registration Data Set                                                                                                                                                                                                                 | 02-04                    |
| Protocol version                  | 3       | Date and version identifier                                                                                                                                                                                                                                                              | 01 and 05                |
| Funding                           | 4       | Sources and types of financial, material, and other support                                                                                                                                                                                                                              | 01                       |
| Roles and responsibilities        | 5a      | Names, affiliations, and roles of protocol contributors                                                                                                                                                                                                                                  | 01                       |
|                                   | 5b      | Name and contact information for the trial sponsor                                                                                                                                                                                                                                       | 01                       |
|                                   | 5c      | Role of study sponsor and funders, if any, in study design; collection, management, analysis, and interpretation of data; writing of the report; and the decision to submit the report for publication, including whether they will have ultimate authority over any of these activities | 06                       |
|                                   | 5d      | Composition, roles, and responsibilities of the coordinating centre, steering committee, endpoint adjudication committee, data management team, and other individuals or groups overseeing the trial, if applicable (see Item 21a for data monitoring committee)                         | 07-10                    |

## Introduction

|                          |    |                                                                                                                                                                                                           |       |
|--------------------------|----|-----------------------------------------------------------------------------------------------------------------------------------------------------------------------------------------------------------|-------|
| Background and rationale | 6a | Description of research question and justification for undertaking the trial, including summary of relevant studies (published and unpublished) examining benefits and harms for each intervention        | 13-14 |
|                          | 6b | Explanation for choice of comparators                                                                                                                                                                     | 15-17 |
| Objectives               | 7  | Specific objectives or hypotheses                                                                                                                                                                         | 14    |
| Trial design             | 8  | Description of trial design including type of trial (eg, parallel group, crossover, factorial, single group), allocation ratio, and framework (eg, superiority, equivalence, noninferiority, exploratory) | 14-15 |

## Methods: Participants, interventions, and outcomes

|                      |     |                                                                                                                                                                                                                                                                                                                                                                                |       |
|----------------------|-----|--------------------------------------------------------------------------------------------------------------------------------------------------------------------------------------------------------------------------------------------------------------------------------------------------------------------------------------------------------------------------------|-------|
| Study setting        | 9   | Description of study settings (eg, community clinic, academic hospital) and list of countries where data will be collected. Reference to where list of study sites can be obtained                                                                                                                                                                                             | 14-15 |
| Eligibility criteria | 10  | Inclusion and exclusion criteria for participants. If applicable, eligibility criteria for study centres and individuals who will perform the interventions (eg, surgeons, psychotherapists)                                                                                                                                                                                   | 17-18 |
| Interventions        | 11a | Interventions for each group with sufficient detail to allow replication, including how and when they will be administered                                                                                                                                                                                                                                                     | 15-16 |
|                      | 11b | Criteria for discontinuing or modifying allocated interventions for a given trial participant (eg, drug dose change in response to harms, participant request, or improving/worsening disease)                                                                                                                                                                                 | NA    |
|                      | 11c | Strategies to improve adherence to intervention protocols, and any procedures for monitoring adherence (eg, drug tablet return, laboratory tests)                                                                                                                                                                                                                              | 25-26 |
|                      | 11d | Relevant concomitant care and interventions that are permitted or prohibited during the trial                                                                                                                                                                                                                                                                                  | 18    |
| Outcomes             | 12  | Primary, secondary, and other outcomes, including the specific measurement variable (eg, systolic blood pressure), analysis metric (eg, change from baseline, final value, time to event), method of aggregation (eg, median, proportion), and time point for each outcome. Explanation of the clinical relevance of chosen efficacy and harm outcomes is strongly recommended | 19-21 |



|   |                      |    |                                                                                                                                                                                       |               |
|---|----------------------|----|---------------------------------------------------------------------------------------------------------------------------------------------------------------------------------------|---------------|
| 1 | Participant timeline | 13 | Time schedule of enrolment, interventions (including any run-ins and washouts), assessments, and visits for participants. A schematic diagram is highly recommended (see Figure)      | 15 (Figure 2) |
| 2 |                      |    |                                                                                                                                                                                       |               |
| 3 |                      |    |                                                                                                                                                                                       |               |
| 4 | Sample size          | 14 | Estimated number of participants needed to achieve study objectives and how it was determined, including clinical and statistical assumptions supporting any sample size calculations | 26            |
| 5 |                      |    |                                                                                                                                                                                       |               |
| 6 |                      |    |                                                                                                                                                                                       |               |
| 7 | Recruitment          | 15 | Strategies for achieving adequate participant enrolment to reach target sample size                                                                                                   | NA            |
| 8 |                      |    |                                                                                                                                                                                       |               |
| 9 |                      |    |                                                                                                                                                                                       |               |

### 10 **Methods: Assignment of interventions (for controlled trials)**

#### 11 Allocation:

|    |                                  |     |                                                                                                                                                                                                                                                                                                                                                          |       |
|----|----------------------------------|-----|----------------------------------------------------------------------------------------------------------------------------------------------------------------------------------------------------------------------------------------------------------------------------------------------------------------------------------------------------------|-------|
| 12 |                                  |     |                                                                                                                                                                                                                                                                                                                                                          |       |
| 13 |                                  |     |                                                                                                                                                                                                                                                                                                                                                          |       |
| 14 | Sequence generation              | 16a | Method of generating the allocation sequence (eg, computer-generated random numbers), and list of any factors for stratification. To reduce predictability of a random sequence, details of any planned restriction (eg, blocking) should be provided in a separate document that is unavailable to those who enrol participants or assign interventions | 18-19 |
| 15 |                                  |     |                                                                                                                                                                                                                                                                                                                                                          |       |
| 16 |                                  |     |                                                                                                                                                                                                                                                                                                                                                          |       |
| 17 |                                  |     |                                                                                                                                                                                                                                                                                                                                                          |       |
| 18 |                                  |     |                                                                                                                                                                                                                                                                                                                                                          |       |
| 19 | Allocation concealment mechanism | 16b | Mechanism of implementing the allocation sequence (eg, central telephone; sequentially numbered, opaque, sealed envelopes), describing any steps to conceal the sequence until interventions are assigned                                                                                                                                                | 18-19 |
| 20 |                                  |     |                                                                                                                                                                                                                                                                                                                                                          |       |
| 21 |                                  |     |                                                                                                                                                                                                                                                                                                                                                          |       |
| 22 |                                  |     |                                                                                                                                                                                                                                                                                                                                                          |       |
| 23 |                                  |     |                                                                                                                                                                                                                                                                                                                                                          |       |
| 24 | Implementation                   | 16c | Who will generate the allocation sequence, who will enrol participants, and who will assign participants to interventions                                                                                                                                                                                                                                | 19    |
| 25 |                                  |     |                                                                                                                                                                                                                                                                                                                                                          |       |
| 26 |                                  |     |                                                                                                                                                                                                                                                                                                                                                          |       |
| 27 | Blinding (masking)               | 17a | Who will be blinded after assignment to interventions (eg, trial participants, care providers, outcome assessors, data analysts), and how                                                                                                                                                                                                                | 19    |
| 28 |                                  |     |                                                                                                                                                                                                                                                                                                                                                          |       |
| 29 |                                  |     |                                                                                                                                                                                                                                                                                                                                                          |       |
| 30 |                                  | 17b | If blinded, circumstances under which unblinding is permissible, and procedure for revealing a participant's allocated intervention during the trial                                                                                                                                                                                                     | 19    |
| 31 |                                  |     |                                                                                                                                                                                                                                                                                                                                                          |       |
| 32 |                                  |     |                                                                                                                                                                                                                                                                                                                                                          |       |
| 33 |                                  |     |                                                                                                                                                                                                                                                                                                                                                          |       |

### 34 **Methods: Data collection, management, and analysis**

|    |                         |     |                                                                                                                                                                                                                                                                                                                                                                                                              |       |
|----|-------------------------|-----|--------------------------------------------------------------------------------------------------------------------------------------------------------------------------------------------------------------------------------------------------------------------------------------------------------------------------------------------------------------------------------------------------------------|-------|
| 35 |                         |     |                                                                                                                                                                                                                                                                                                                                                                                                              |       |
| 36 | Data collection methods | 18a | Plans for assessment and collection of outcome, baseline, and other trial data, including any related processes to promote data quality (eg, duplicate measurements, training of assessors) and a description of study instruments (eg, questionnaires, laboratory tests) along with their reliability and validity, if known. Reference to where data collection forms can be found, if not in the protocol | 21-24 |
| 37 |                         |     |                                                                                                                                                                                                                                                                                                                                                                                                              |       |
| 38 |                         |     |                                                                                                                                                                                                                                                                                                                                                                                                              |       |
| 39 |                         |     |                                                                                                                                                                                                                                                                                                                                                                                                              |       |
| 40 |                         |     |                                                                                                                                                                                                                                                                                                                                                                                                              |       |
| 41 |                         |     |                                                                                                                                                                                                                                                                                                                                                                                                              |       |
| 42 |                         |     |                                                                                                                                                                                                                                                                                                                                                                                                              |       |

1 18b Plans to promote participant retention and complete follow-up, including list of any outcome data to be 24-25  
2 collected for participants who discontinue or deviate from intervention protocols  
3  
4 Data management 19 Plans for data entry, coding, security, and storage, including any related processes to promote data quality 24-25  
5 (eg, double data entry; range checks for data values). Reference to where details of data management  
6 procedures can be found, if not in the protocol  
7  
8 Statistical methods 20a Statistical methods for analysing primary and secondary outcomes. Reference to where other details of 26-27  
9 the statistical analysis plan can be found, if not in the protocol  
10  
11 20b Methods for any additional analyses (eg, subgroup and adjusted analyses) 26  
12  
13 20c Definition of analysis population relating to protocol non-adherence (eg, as randomised analysis), and any 26  
14 statistical methods to handle missing data (eg, multiple imputation)  
15  
16  
17 **Methods: Monitoring**  
18  
19 Data monitoring 21a Composition of data monitoring committee (DMC); summary of its role and reporting structure; statement 25  
20 of whether it is independent from the sponsor and competing interests; and reference to where further  
21 details about its charter can be found, if not in the protocol. Alternatively, an explanation of why a DMC is  
22 not needed  
23  
24 21b Description of any interim analyses and stopping guidelines, including who will have access to these 25  
25 interim results and make the final decision to terminate the trial  
26  
27 Harms 22 Plans for collecting, assessing, reporting, and managing solicited and spontaneously reported adverse 25  
28 events and other unintended effects of trial interventions or trial conduct  
29  
30 Auditing 23 Frequency and procedures for auditing trial conduct, if any, and whether the process will be independent 26  
31 from investigators and the sponsor  
32  
33  
34 **Ethics and dissemination**  
35  
36 Research ethics 24 Plans for seeking research ethics committee/institutional review board (REC/IRB) approval 27-28  
37 approval  
38  
39  
40  
41  
42

|    |                     |     |                                                                                                                 |          |
|----|---------------------|-----|-----------------------------------------------------------------------------------------------------------------|----------|
| 1  | Protocol            | 25  | Plans for communicating important protocol modifications (eg, changes to eligibility criteria, outcomes,        | 27-28    |
| 2  | amendments          |     | analyses) to relevant parties (eg, investigators, REC/IRBs, trial participants, trial registries, journals,     |          |
| 3  |                     |     | regulators)                                                                                                     |          |
| 4  |                     |     |                                                                                                                 |          |
| 5  | Consent or assent   | 26a | Who will obtain informed consent or assent from potential trial participants or authorised surrogates, and      | 27-28    |
| 6  |                     |     | how (see Item 32)                                                                                               |          |
| 7  |                     |     |                                                                                                                 |          |
| 8  |                     | 26b | Additional consent provisions for collection and use of participant data and biological specimens in            | NA       |
| 9  |                     |     | ancillary studies, if applicable                                                                                |          |
| 10 |                     |     |                                                                                                                 |          |
| 11 | Confidentiality     | 27  | How personal information about potential and enrolled participants will be collected, shared, and               | 28       |
| 12 |                     |     | maintained in order to protect confidentiality before, during, and after the trial                              |          |
| 13 |                     |     |                                                                                                                 |          |
| 14 |                     |     |                                                                                                                 |          |
| 15 | Declaration of      | 28  | Financial and other competing interests for principal investigators for the overall trial and each study site   | 29       |
| 16 | interests           |     |                                                                                                                 |          |
| 17 |                     |     |                                                                                                                 |          |
| 18 | Access to data      | 29  | Statement of who will have access to the final trial dataset, and disclosure of contractual agreements that     | 28       |
| 19 |                     |     | limit such access for investigators                                                                             |          |
| 20 |                     |     |                                                                                                                 |          |
| 21 | Ancillary and post- | 30  | Provisions, if any, for ancillary and post-trial care, and for compensation to those who suffer harm from trial | NA       |
| 22 | trial care          |     | participation                                                                                                   |          |
| 23 |                     |     |                                                                                                                 |          |
| 24 | Dissemination       | 31a | Plans for investigators and sponsor to communicate trial results to participants, healthcare professionals,     | 28       |
| 25 | policy              |     | the public, and other relevant groups (eg, via publication, reporting in results databases, or other data       |          |
| 26 |                     |     | sharing arrangements), including any publication restrictions                                                   |          |
| 27 |                     |     |                                                                                                                 |          |
| 28 |                     | 31b | Authorship eligibility guidelines and any intended use of professional writers                                  | 28       |
| 29 |                     |     |                                                                                                                 |          |
| 30 |                     | 31c | Plans, if any, for granting public access to the full protocol, participant-level dataset, and statistical code | NA       |
| 31 |                     |     |                                                                                                                 |          |
| 32 |                     |     |                                                                                                                 |          |
| 33 | <b>Appendices</b>   |     |                                                                                                                 |          |
| 34 |                     |     |                                                                                                                 |          |
| 35 | Informed consent    | 32  | Model consent form and other related documentation given to participants and authorised surrogates              | Appendix |
| 36 | materials           |     |                                                                                                                 |          |
| 37 |                     |     |                                                                                                                 |          |
| 38 | Biological          | 33  | Plans for collection, laboratory evaluation, and storage of biological specimens for genetic or molecular       | NA       |
| 39 | specimens           |     | analysis in the current trial and for future use in ancillary studies, if applicable                            |          |
| 40 |                     |     |                                                                                                                 |          |
| 41 |                     |     |                                                                                                                 |          |

1  
2  
3  
4  
5  
6  
7  
8  
9  
10  
11  
12  
13  
14  
15  
16  
17  
18  
19  
20  
21  
22  
23  
24  
25  
26  
27  
28  
29  
30  
31  
32  
33  
34  
35  
36  
37  
38  
39  
40  
41  
42  
43  
44  
45  
46

\*It is strongly recommended that this checklist be read in conjunction with the SPIRIT 2013 Explanation & Elaboration for important clarification on the items. Amendments to the protocol should be tracked and dated. The SPIRIT checklist is copyrighted by the SPIRIT Group under the Creative Commons [“Attribution-NonCommercial-NoDerivs 3.0 Unported”](#) license.

For peer review only

**Supplementary File 2. Research ethics committees of the TELESCOPE trial.**

| Centre      | HOSPITAL (Brazilian estate)                                       | RESEARCH ETHICS COMMITTEE                                                                               | APPROVAL NUMBER           |
|-------------|-------------------------------------------------------------------|---------------------------------------------------------------------------------------------------------|---------------------------|
| Coordinator | Hospital Albert Einstein (SP)                                     | Hospita Israelita Albert Einstein HIAE                                                                  | CAAE 01523118.0.1001.0071 |
| Centre 1    | Hospital Universitário da Universidade Federal de Sergipe (SE)    | Universidade Federal de Sergipe UFS                                                                     | CAAE 01523118.0.2005.5546 |
| Centre 2    | Hospital Municipal Senhora Santana (Hospital Microrregional) (MG) | Faculdade de Talentos Humanos - FACTHUS                                                                 | CAAE 01523118.0.2001.9028 |
| Centre 3    | Santa Casa de Paranavaí (PR)                                      | Universidade Estadual do Parana UNESPAR                                                                 | CAAE 01523118.0.2025.9247 |
| Centre 4    | Hospital de Caridade de Irati (PR)                                | Universidade Estadual do Centro Oeste - Campus de Irati - UNICENTRO                                     | CAAE 01523118.0.2015.8967 |
| Centre 5    | Hospital Regional de Gurupi (TO)                                  | Centro Universitario UNIRG                                                                              | CAAE 01523118.0.2026.5518 |
| Centre 6    | Hospital Nossa Senhora da Oliveira – HNSO (RS)                    | Comitê de Ética em Pesquisa do Hospital Nossa Senhora de Pompéia                                        | CAAE 01523118.0.2023.5331 |
| Centre 7    | Hospital de Trauma Dom Luiz Gonzaga Fernandes (PB)                | Secretaria de Saude do Estado da Paraíba                                                                | CAAE 01523118.0.2033.5186 |
| Centre 8    | Hospital Regional de Assis (SP)                                   | Hospital Regional do Câncer de Presidente Prudente HRCPP                                                | CAAE 01523118.0.2012.8247 |
| Centre 9    | Hospital Municipal de Paracatu (MG)                               | Faculdade de Ciências e Educação Sena Aires                                                             | CAAE 01523118.0.2010.5595 |
| Centre 10   | Hospital Regional Dr. Clodolfo Rodrigues de Melo (AL)             | Universidade Federal de Alagoas                                                                         | CAAE 01523118.0.2029.5013 |
| Centre 11   | Hospital Municipal Rocha Faria (RJ)                               | Secretaria Municipal de Saúde do Rio de Janeiro - SMS/RJ                                                | CAAE 01523118.0.2021.5279 |
| Centre 12   | Hospital Universitario Nova Esperança (PB)                        | Escola de Enfermagem Nova Esperança LTDA                                                                | CAAE 01523118.0.2013.5179 |
| Centre 13   | Santa Casa de Itapetininga (SP)                                   | Faculdade de Ciências Médicas e da Saúde da Pontifícia Universidade Católica de São Paulo - FCMS-PUC/SP | CAAE 1523118.0.2038.5373  |
| Centre 14   | Casa de Caridade de Muriaé - Hospital São Paulo (MG)              | Hospital Santa Paula - SP                                                                               | CAAE 01523118.0.2036.5670 |
| Centre 15   | Santa Casa de Misericórdia de Votuporanga (SP)                    | CEP UNIFEV                                                                                              | CAAE 01523118.0.2006.0078 |
| Centre 16   | Irmandade da Santa Casa de Sorocaba (SP)                          | Universidade de Sorocaba UNISO                                                                          | CAAE 01523118.0.2022.5500 |
| Centre 17   | Santa Casa de Misericórdia de Belo Horizonte (MG)                 | Santa Casa de Misericórdia de Belo Horizonte - SCMBH                                                    | CAAE 01523118.0.2008.5138 |
| Centre 18   | Hospital da Restauração - Secretaria Estadual de Saúde (PE)       | Hospital da Restauração - PE CEP/HUOC/PROCAPE                                                           | CAAE 01523118.0.2004.5198 |
| Centre 19   | Hospital Geral de Roraima (RR)                                    | Universidade Federal de Roraima - UFRR                                                                  | CAAE 01523118.0.2011.5302 |
| Centre 20   | Hospital Geral de Vitória da Conquista (BA)                       | Secretaria da Saude do Estado da Bahia - SESAB                                                          | CAAE 01523118.0.2009.0052 |
| Centre 21   | Hospital Regional Justino Luz (PI)                                | Hospital Universitário da Universidade Federal do Piauí UFPI                                            | CAAE 01523118.0.2030.8050 |

|           |                                                                                   |                                                                            |                           |
|-----------|-----------------------------------------------------------------------------------|----------------------------------------------------------------------------|---------------------------|
| Centre 22 | Complexo Hospitalar Mangabeira Governador Tarcísio Burity (PB)                    | UFPB - Centro de Ciências da Saúde da Universidade Federal da Paraíba UFPB | CAAE 01523118.0.2003.5188 |
| Centre 23 | Hospital Regional de Barbacena Dr. José Américo (MG)                              | Fundação Hospitalar do Estado de Minas Gerais FHEMIG                       | CAAE 01523118.0.2024.5119 |
| Centre 24 | Hospital Geral de Promissão Prefeito Miguel Martin Gualda (SP)                    | Hospital Regional do Câncer de Presidente Prudente HRCPP                   | CAAE 01523118.0.2037.8247 |
| Centre 25 | Hospital Maternidade e Pronto Socorro Santa Lúcia LTDA (MG)                       | Hospital Vera Cruz HVC/ MG                                                 | CAAE 01523118.0.2002.5135 |
| Centre 26 | Hospital Municipal Padre Germano Lauck - Hospital Municipal de Foz do Iguaçu (PR) | Centro Universitário Dinâmica das Cataratas UDC                            | CAAE 01523118.0.2007.8527 |
| Centre 27 | Santa Casa de Anápolis (GO)                                                       | UEG - Universidade Estadual de Goiás                                       | CAAE 01523118.0.2031.8113 |
| Centre 28 | Santa Casa de Misericórdia de Passos (MG)                                         | Santa Casa de Misericórdia de Passos SCMP                                  | CAAE 01523118.0.2014.8043 |
| Centre 29 | Hospital Geral e Maternidade Tereza Ramos (SC)                                    | Secretaria de Estado da Saúde de Santa Catarina/SES                        | CAAE 01523118.0.2016.0115 |
| Centre 30 | Hospital Regional do Paranoá (DF)                                                 | Comitê de Ética em Pesquisa FEPECS/SES-DF                                  | CAAE 01523118.0.2019.5553 |
