# Supplementary material for: TELE-critical Care verSus usual Care On ICU PErformance (TELESCOPE): protocol for a cluster-randomised clinical trial on adult general ICUs in Brazil
Source: PubMed Central journal article supplement — BMJ Open. 2021 Jun 21;11(6):e042302. doi: 10.1136/bmjopen-2020-042302 (PMC8217943; doi:10.1136/bmjopen-2020-042302), 2021-06-21
Supplement: bmjopen-2020-042302supp002.pdf [file bmjopen-2020-042302supp002.pdf]

**Supplementary File 2.** Research ethics committees of the TELESCOPE trial.

| Centre      | HOSPITAL (Brazilian estate)                                       | RESEARCH ETHICS COMMITTEE                                                                               | APPROVAL NUMBER           |
|-------------|-------------------------------------------------------------------|---------------------------------------------------------------------------------------------------------|---------------------------|
| Coordinator | Hospital Albert Einstein (SP)                                     | Hospita Israelita Albert Einstein HIAE                                                                  | CAAE 01523118.0.1001.0071 |
| Centre 1    | Hospital Universitário da Universidade Federal de Sergipe (SE)    | Universidade Federal de Sergipe UFS                                                                     | CAAE 01523118.0.2005.5546 |
| Centre 2    | Hospital Municipal Senhora Santana (Hospital Microrregional) (MG) | Faculdade de Talentos Humanos - FACTHUS                                                                 | CAAE 01523118.0.2001.9028 |
| Centre 3    | Santa Casa de Paranaíba (PR)                                      | Universidade Estadual do Parana UNESPAR                                                                 | CAAE 01523118.0.2025.9247 |
| Centre 4    | Hospital de Caridade de Irati (PR)                                | Universidade Estadual do Centro Oeste - Campus de Irati - UNICENTRO                                     | CAAE 01523118.0.2015.8967 |
| Centre 5    | Hospital Regional de Gurupi (TO)                                  | Centro Universitario UNIRG                                                                              | CAAE 01523118.0.2026.5518 |
| Centre 6    | Hospital Nossa Senhora da Oliveira – HNSO (RS)                    | Comitê de Ética em Pesquisa do Hospital Nossa Senhora de Pompéia                                        | CAAE 01523118.0.2023.5331 |
| Centre 7    | Hospital de Trauma Dom Luiz Gonzaga Fernandes (PB)                | Secretaria de Saude do Estado da Paraíba                                                                | CAAE 01523118.0.2033.5186 |
| Centre 8    | Hospital Regional de Assis (SP)                                   | Hospital Regional do Câncer de Presidente Prudente HRCPP                                                | CAAE 01523118.0.2012.8247 |
| Centre 9    | Hospital Municipal de Paracatu (MG)                               | Faculdade de Ciências e Educação Sena Aires                                                             | CAAE 01523118.0.2010.5595 |
| Centre 10   | Hospital Regional Dr. Clodolfo Rodrigues de Melo (AL)             | Universidade Federal de Alagoas                                                                         | CAAE 01523118.0.2029.5013 |
| Centre 11   | Hospital Municipal Rocha Faria (RJ)                               | Secretaria Municipal de Saúde do Rio de Janeiro - SMS/RJ                                                | CAAE 01523118.0.2021.5279 |
| Centre 12   | Hospital Universitario Nova Esperança (PB)                        | Escola de Enfermagem Nova Esperança LTDA                                                                | CAAE 01523118.0.2013.5179 |
| Centre 13   | Santa Casa de Itapetininga (SP)                                   | Faculdade de Ciências Médicas e da Saúde da Pontifícia Universidade Católica de São Paulo - FCMS-PUC/SP | CAAE 1523118.0.2038.5373  |
| Centre 14   | Casa de Caridade de Muriaé - Hospital São Paulo (MG)              | Hospital Santa Paula - SP                                                                               | CAAE 01523118.0.2036.5670 |
| Centre 15   | Santa Casa de Misericórdia de Votuporanga (SP)                    | CEP UNIFEV                                                                                              | CAAE 01523118.0.2006.0078 |
| Centre 16   | Irmandade da Santa Casa de Sorocaba (SP)                          | Universidade de Sorocaba UNISO                                                                          | CAAE 01523118.0.2022.5500 |
| Centre 17   | Santa Casa de Misericórdia de Belo Horizonte (MG)                 | Santa Casa de Misericórdia de Belo Horizonte - SCMBH                                                    | CAAE 01523118.0.2008.5138 |
| Centre 18   | Hospital da Restauração - Secretaria Estadual de Saúde (PE)       | Hospital da Restauração - PE CEP/HUOC/PROCAPE                                                           | CAAE 01523118.0.2004.5198 |
| Centre 19   | Hospital Geral de Roraima (RR)                                    | Universidade Federal de Roraima - UFRR                                                                  | CAAE 01523118.0.2011.5302 |
| Centre 20   | Hospital Geral de Vitória da Conquista (BA)                       | Secretaria da Saude do Estado da Bahia - SESAB                                                          | CAAE 01523118.0.2009.0052 |
| Centre 21   | Hospital Regional Justino Luz (PI)                                | Hospital Universitário da Universidade Federal do Piauí UFPI                                            | CAAE 01523118.0.2030.8050 |

|           |                                                                                   |                                                                            |                           |
|-----------|-----------------------------------------------------------------------------------|----------------------------------------------------------------------------|---------------------------|
| Centre 22 | Complexo Hospitalar Mangabeira Governador Tarcísio Burity (PB)                    | UFPB - Centro de Ciências da Saúde da Universidade Federal da Paraíba UFPB | CAAE 01523118.0.2003.5188 |
| Centre 23 | Hospital Regional de Barbacena Dr. José Américo (MG)                              | Fundação Hospitalar do Estado de Minas Gerais FHEMIG                       | CAAE 01523118.0.2024.5119 |
| Centre 24 | Hospital Geral de Promissão Prefeito Miguel Martin Gualda (SP)                    | Hospital Regional do Câncer de Presidente Prudente HRCPP                   | CAAE 01523118.0.2037.8247 |
| Centre 25 | Hospital Maternidade e Pronto Socorro Santa Lúcia LTDA (MG)                       | Hospital Vera Cruz HVC/ MG                                                 | CAAE 01523118.0.2002.5135 |
| Centre 26 | Hospital Municipal Padre Germano Lauck - Hospital Municipal de Foz do Iguaçu (PR) | Centro Universitário Dinâmica das Cataratas UDC                            | CAAE 01523118.0.2007.8527 |
| Centre 27 | Santa Casa de Anápolis (GO)                                                       | UEG - Universidade Estadual de Goiás                                       | CAAE 01523118.0.2031.8113 |
| Centre 28 | Santa Casa de Misericórdia de Passos (MG)                                         | Santa Casa de Misericórdia de Passos SCMP                                  | CAAE 01523118.0.2014.8043 |
| Centre 29 | Hospital Geral e Maternidade Tereza Ramos (SC)                                    | Secretaria de Estado da Saúde de Santa Catarina/SES                        | CAAE 01523118.0.2016.0115 |
| Centre 30 | Hospital Regional do Paranoá (DF)                                                 | Comitê de Ética em Pesquisa FEPECS/SES-DF                                  | CAAE 01523118.0.2019.5553 |
